# Supplementary material for: Uncovering a ‘sensitive window’ of multisensory and motor neuroplasticity in the cerebrum and cerebellum of male and female starlings
Source: eLife. 2021 Jun 7;10:e66777. doi: 10.7554/eLife.66777 (PMC8219385; doi:10.7554/eLife.66777)
Supplement: Figure 3—figure supplement 1—source data 1. [file elife-66777-fig3-figsupp1-data1.xlsx]

## Sheet: Sheet1
subject_nr	time	sex	Brainsize	L/S	Nidopallium_L	TeO_L	TeO_R	HVC_RA_R	LaM_R	cerebellum_lobuleVII		tracts	tFA_L	AreaX_L
1	1	Male	1904.7	Large	0.516375	0.740847	0.726215	0.54516	0.519513	0.805984		0.833692	0.582101	0.499986
1	2	Male	1899.3	Large	0.525747	0.74413	0.715756	0.534549	0.572984	0.806524		0.803407	0.660321	0.521096
1	3	Male	1900.2	Large	0.512165	0.800336	0.849348	0.549392	0.570113	0.849742		0.840191	0.660204	0.479466
1	4	Male	1899	Large	0.490644	0.768537	0.762479	0.554972	0.534357	0.892583		0.86498	0.71521	0.4707
1	5	Male	1896.7	Large	0.497424	0.722697	0.676311	0.586003	0.535828	0.902223		0.829959	0.613877	0.524137
1	6	Male	1904.7	Large	0.489705	0.723823	0.781301	0.557221	0.55083	0.882729		0.836673	0.627212	0.472313
2	1	Male	1794.5	Small	0.493883	0.76295	0.701862	0.527922	0.564254	0.891338		0.836506	0.59329	0.428017
2	2	Male	1776.3	Small	0.506334	0.781372	0.68416	0.578374	0.479343	0.84986		0.839929	0.618377	0.51482
2	3	Male	1777.5	Small	0.477143	0.818582	0.763564	0.509152	0.586359	0.870596		0.850195	0.551901	0.457491
2	4	Male	1772.9	Small	0.486464	0.818022	0.787094	0.5265	0.490903	0.928288		0.859002	0.58482	0.500428
2	5	Male	1755.2	Small	0.482685	0.753244	0.680584	0.515227	0.551266	0.802519		0.819086	0.538206	0.508067
2	6	Male	1794.5	Small	0.493706	0.79698	0.784882	0.535841	0.533724	0.862497		0.831378	0.667363	0.469268
3	1	Male	1777.3	Small	0.507893	0.691979	0.813904	0.588138	0.583168	0.904852		0.808339	0.623921	0.468991
3	2	Male	1773.3	Small	0.491483	0.695196	0.666436	0.602606	0.550728	0.859174		0.838022	0.614463	0.462584
3	3	Male	1775.2	Small	0.472416	0.731427	0.779833	0.604676	0.49722	1.01221		0.865863	0.618873	0.442181
3	4	Male	1772.3	Small	0.494046	0.725966	0.765611	0.580799	0.504045	0.983387		0.841213	0.595597	0.382152
3	5	Male	1770.6	Small	0.489913	0.769902	0.765587	0.601723	0.523431	1.07815		0.838947	0.564013	0.503174
3	6	Male	1777.3	Small	0.488525	0.723696	0.641428	0.559204	0.459948	0.899655		0.857171	0.586254	0.525188
4	1	Male	1812	Small	0.491102	0.714489	0.725959	0.525582	0.493657	0.871422		0.838216	0.552001	0.551158
4	2	Male	1802.2	Small	0.467422	0.702299	0.694997	0.733817	0.446268	0.835901		0.855866	0.534162	0.51767
4	3	Male	1801.7	Small	0.489153	0.760598	0.751267	0.52239	0.488994	0.925991		0.871224	0.535894	0.488214
4	4	Male	1801.4	Small	0.492272	0.698758	0.687114	0.528174	0.499281	0.912034		0.869219	0.51448	0.486902
4	5	Male	1800.3	Small	0.480476	0.729826	0.767158	0.495844	0.497598	0.796719		0.861383	0.565246	0.502709
4	6	Male	1812	Small	0.477506	0.770285	0.739627	0.491135	0.519364	0.809877		0.868025	0.650678	0.520458
5	1	Male	1929.32	Large	0.476702	0.727668	0.804194	0.513266	0.52268	0.824831		0.867992	0.706488	0.480618
5	2	Male	1909.34	Large	0.489499	0.770137	0.734206	0.536266	0.532812	0.699301		0.839329	0.712343	0.568255
6	1	Male	1807.6	Small	0.500845	0.815412	0.860392	0.601846	0.525569	0.84075		0.846504	0.703361	0.537846
6	2	Male	1803.9	Small	0.490532	0.716435	0.835329	0.522996	0.531075	0.77611		0.8381	0.674511	0.453242
6	3	Male	1803.4	Small	0.496386	0.771843	0.950484	0.569406	0.511841	0.865905		0.810599	0.658226	0.521931
6	4	Male	1803.7	Small	0.481416	0.691825	0.716797	0.561855	0.550205	0.877136		0.829442	0.641159	0.523465
6	5	Male	1800.2	Small	0.492895	0.767416	0.767459	0.578705	0.506675	1.0058		0.805468	0.664862	0.461257
6	6	Male	1807.6	Small	0.515278	0.742608	0.774792	0.592257	0.542379	0.917369		0.82779	0.651655	0.563921
7	1	Male	1861.8	Large	0.498459	0.744298	0.713341	0.552792	0.487145	0.884591		0.840629	0.669646	0.542488
7	2	Male	1860.8	Large	0.507507	0.726029	0.701367	0.534512	0.496147	0.900004		0.835092	0.547878	0.498641
7	3	Male	1859.2	Large	0.497807	0.798735	0.750204	0.555541	0.491674	0.930357		0.825996	0.557758	0.493647
7	5	Male	1855.8	Large	0.493579	0.703257	0.664055	0.529553	0.534136	0.943701		0.827461	0.630637	0.49066
7	6	Male	1861.8	Large	0.492186	0.758571	0.785795	0.541186	0.474731	1.05236		0.832326	0.633107	0.437519
8	1	Male	1739.3	Small	0.491594	0.721301	0.837483	0.5618	0.523086	0.802724		0.847368	0.586755	0.560594
8	2	Male	1725.4	Small	0.516183	0.790191	0.784489	0.576895	0.4919	0.864966		0.834541	0.701821	0.582467
8	3	Male	1724.9	Small	0.511701	0.941167	1.33696	0.581812	0.483979	0.853079		0.809946	0.548054	0.489548
8	4	Male	1726.9	Small	0.495923	0.779279	1.05464	0.577347	0.492449	0.844848		0.822486	0.507433	0.485072
8	5	Male	1718.7	Small	0.472681	0.754445	0.833617	0.581688	0.50268	0.901504		0.867392	0.516751	0.4768
8	6	Male	1739.3	Small	0.490643	0.778473	0.76217	0.581243	0.490945	0.916327		0.846492	0.626818	0.546836
9	1	Male	1813.5	Large	0.489653	0.719901	0.802981	0.577048	0.540022	0.966977		0.847546	0.594518	0.475317
9	2	Male	1809.8	Large	0.516016	0.735001	0.72768	0.577081	0.526326	1.0126		0.854783	0.594951	0.526316
9	3	Male	1808.2	Large	0.52136	0.685478	0.723451	0.547828	0.530912	0.997194		0.831641	0.600758	0.470967
9	4	Male	1811.2	Large	0.52108	0.698767	0.6708	0.573733	0.52632	0.942111		0.8394	0.649575	0.559893
9	5	Male	1807.1	Large	0.499083	0.774081	0.778467	0.561733	0.544522	1.00688		0.858529	0.633263	0.542265
9	6	Male	1813.5	Large	0.494132	0.720363	0.769411	0.531082	0.525431	1.11499		0.844313	0.620012	0.52288
10	1	Male	1973.1	Large	0.497726	0.747599	0.726951	0.531157	0.460666	0.874036		0.861158	0.686717	0.566515
10	2	Male	1953.5	Large	0.521036	0.719634	0.784456	0.554424	0.486886	0.875954		0.82736	0.608583	0.557761
10	3	Male	1953.4	Large	0.514169	0.788415	0.901451	0.612272	0.440239	0.946892		0.826144	0.569438	0.49312
10	4	Male	1948.4	Large	0.486075	0.755781	0.76231	0.597259	0.46938	0.932659		0.854325	0.670221	0.502418
10	5	Male	1945.1	Large	0.501466	0.718794	0.826666	0.603492	0.485669	0.961465		0.814494	0.549903	0.510165
10	6	Male	1973.1	Large	0.500614	0.729891	0.814417	0.598394	0.490482	1.00968		0.842315	0.567517	0.536282
11	1	Male	1862.5	Large	0.492231	0.705823	0.771708	0.573752	0.497771	0.904633		0.856085	0.685608	0.443375
11	2	Male	1851.5	Large	0.494057	0.738023	0.739816	0.574894	0.457166	0.899462		0.854836	0.630017	0.453061
11	3	Male	1851.5	Large	0.510833	0.720853	0.726953	0.598728	0.475128	0.856319		0.84877	0.644634	0.42586
11	4	Male	1846.5	Large	0.492321	0.805738	0.78174	0.613761	0.463863	0.974491		0.852759	0.686389	0.532888
11	5	Male	1847.8	Large	0.492122	0.757156	0.750417	0.628795	0.508749	1.03949		0.862473	0.669927	0.445896
11	6	Male	1862.5	Large	0.477396	0.740309	0.766799	0.612994	0.476811	1.00296		0.876368	0.611693	0.455196
12	1	Male	1758	Small	0.483596	0.774947	0.792125	0.574549	0.44762	0.807515		0.855653	0.650245	0.523147
12	2	Male	1740.5	Small	0.509562	0.783962	0.790264	0.602644	0.457609	0.822503		0.825261	0.625853	0.508384
12	3	Male	1742.4	Small	0.508613	0.653684	0.604916	0.526361	0.583808	0.912842		0.764497	0.559014	0.522303
12	4	Male	1743	Small	0.478034	0.738915	0.729936	0.588009	0.456603	0.847575		0.86486	0.656662	0.488509
12	5	Male	1741.7	Small	0.49026	0.734133	0.682005	0.569919	0.498742	0.851278		0.861125	0.644509	0.474654
12	6	Male	1758	Small	0.507374	0.76788	0.720505	0.610139	0.464882	0.87534		0.816455	0.689397	0.450139
13	1	Male	1744.5	Small	0.493125	0.801388	0.728789	0.581163	0.487638	0.814405		0.816563	0.621519	0.514881
13	2	Male	1731.3	Small	0.504851	0.789121	0.805536	0.568194	0.475792	0.845883		0.837002	0.664099	0.452799
13	3	Male	1734	Small	0.518123	0.700063	0.764373	0.596996	0.510976	0.957468		0.792941	0.580543	0.549995
13	4	Male	1734.2	Small	0.496757	0.726912	0.74246	0.569636	0.508653	0.937579		0.822835	0.660776	0.635168
13	5	Male	1731.3	Small	0.48466	0.740067	0.809106	0.573424	0.51099	1.01491		0.831212	0.711823	0.54429
13	6	Male	1744.5	Small	0.498364	0.708014	0.747763	0.583443	0.560137	0.885016		0.827305	0.594881	0.496767
14	1	Female	1889.06	Large	0.431348	0.730848	0.735629	0.536848	0.391652	0.902032		0.929053	0.771917	0.508125
14	2	Female	1911.4	Large	0.43974	0.684181	0.725083	0.544325	0.493345	0.914537		0.902389	0.752671	0.511311
14	3	Female	1893.85	Large	0.448969	0.616801	0.671146	0.518851	0.406281	0.873991		0.88281	0.777663	0.613107
14	4	Female	1915.88	Large	0.433143	0.670801	0.663225	0.486699	0.428352	0.848744		0.92936	0.587101	0.55724
14	5	Female	1913.93	Large	0.433354	0.695628	0.643475	0.482419	0.409935	0.816357		0.945199	0.667079	0.521532
14	6	Female	1905.85	Large	0.475934	0.677899	0.674092	0.522081	0.513616	1.02828		0.838006	0.656963	0.538193
15	1	Female	1716.04	Small	0.434423	0.679954	0.733918	0.563451	0.498152	0.765016		0.909924	0.679154	0.509819
15	2	Female	1731.33	Small	0.431274	0.692243	0.682392	0.499594	0.500297	0.747396		0.906448	0.720472	0.521613
15	3	Female	1712.76	Small	0.428965	0.684793	0.71138	0.513287	0.48125	0.777874		0.894104	0.687023	0.527587
15	4	Female	1694.36	Small	0.437135	0.670713	0.703555	0.507438	0.41391	0.807041		0.894235	0.634711	0.513681
15	5	Female	1694.15	Small	0.431649	0.643432	0.658218	0.534998	0.377125	0.842956		0.862695	0.608354	0.603956
15	6	Female	1682.18	Small	0.446421	0.673899	0.732074	0.50996	0.490952	0.83467		0.90733	0.604621	0.623695
16	1	Female	1735.5	Small	0.44429	0.69175	0.664192	0.511773	0.44235	0.838202		0.889103	0.714394	0.512042
16	2	Female	1734.15	Small	0.440811	0.699494	0.704826	0.48677	0.442941	0.74044		0.910553	0.696847	0.601581
16	3	Female	1743.03	Small	0.415809	0.692948	0.68361	0.474936	0.427213	0.71816		0.948972	0.813434	0.584319
16	4	Female	1739.23	Small	0.421013	0.65794	0.647419	0.494048	0.461329	0.747633		0.922299	0.724202	0.566532
16	5	Female	1720.53	Small	0.386654	0.596513	0.68518	0.498171	0.464843	0.867295		0.951731	0.689013	0.536385
16	6	Female	1749.24	Small	0.456822	0.695201	0.692288	0.515305	0.486369	0.803949		0.906347	0.602513	0.600652
17	1	Female	1763.32	Small	0.448094	0.61996	0.627926	0.58332	0.482314	0.769583		0.916379	0.652309	0.561099
17	2	Female	1803.66	Small	0.453385	0.681734	0.65222	0.520383	0.38235	0.813669		0.880095	0.525657	0.548967
17	3	Female	1820.24	Small	0.457658	0.700285	0.663139	0.49635	0.457848	0.808843		0.918689	0.645307	0.630387
17	4	Female	1795.84	Small	0.440278	0.656521	0.625165	0.488613	0.442489	0.810193		0.907046	0.696655	0.548185
17	6	Female	1788.42	Small	0.459956	0.656905	0.64931	0.532219	0.493607	0.822879		0.88561	0.63559	0.599881
18	1	Female	1590.88	Small	0.458954	0.748074	0.782508	0.512368	0.461372	0.779767		0.916001	0.61184	0.539787
18	2	Female	1602.99	Small	0.46009	0.658344	0.651287	0.513705	0.409241	0.849682		0.879786	0.607898	0.638547
18	3	Female	1597.51	Small	0.465682	0.669275	0.702371	0.473507	0.442807	0.788645		0.887281	0.686982	0.563543
18	4	Female	1591.26	Small	0.426967	0.674048	0.630583	0.487859	0.441241	0.785442		0.917395	0.691735	0.578854
18	5	Female	1603.09	Small	0.450157	0.660939	0.647699	0.477871	0.410844	0.85532		0.89555	0.713577	0.552469
18	6	Female	1585.02	Small	0.470744	0.635025	0.689981	0.502545	0.532182	0.839242		0.872195	0.662871	0.663746
19	1	Female	1829.28	Large	0.446064	0.731951	0.679125	0.517567	0.42937	0.84568		0.924404	0.664974	0.539605
19	2	Female	1849.5	Large	0.433371	0.672497	0.650756	0.489649	0.447524	0.788451		0.883199	0.721021	0.48799
19	3	Female	1849.01	Large	0.438381	0.707399	0.63423	0.4878	0.474208	0.774943		0.917424	0.715021	0.548272
19	4	Female	1848.94	Large	0.431804	0.648192	0.638824	0.497733	0.457248	0.759916		0.89482	0.752991	0.461505
19	5	Female	1849.15	Large	0.408467	0.671088	0.610432	0.496716	0.515512	0.779951		0.936496	0.740396	0.50802
19	6	Female	1835.9	Large	0.469881	0.717501	0.703991	0.5074	0.500899	0.868383		0.913004	0.846263	0.546925
20	1	Female	1859.92	Large	0.449792	0.717985	0.700586	0.61468	0.489949	0.873187		0.899028	0.619852	0.502581
20	2	Female	1879.05	Large	0.449398	0.697835	0.753789	0.531583	0.404593	0.904434		0.896449	0.669374	0.494127
20	3	Female	1906.06	Large	0.46771	0.757832	0.741521	0.538899	0.498075	0.907141		0.896129	0.561127	0.486323
20	4	Female	1855.68	Large	0.436783	0.667398	0.651649	0.527719	0.465667	0.851403		0.915583	0.598889	0.485691
20	5	Female	1889.02	Large	0.448071	0.633497	0.653694	0.504062	0.432021	0.853583		0.886711	0.61032	0.471222
20	6	Female	1869	Large	0.472283	0.682657	0.672536	0.542294	0.433134	0.975179		0.877758	0.666786	0.49756
21	1	Female	1799.61	Large	0.411322	0.683442	0.692055	0.512466	0.52507	0.762116		0.931527	0.604544	0.46634
21	2	Female	1815.94	Large	0.408938	0.756771	0.736292	0.459985	0.430074	0.783883		0.947496	0.640333	0.535699
21	3	Female	1830.13	Large	0.425196	0.732536	0.719613	0.472022	0.449349	0.838857		0.935734	0.754539	0.552586
21	4	Female	1827.93	Large	0.414574	0.682988	0.655572	0.484696	0.408316	0.760771		0.941815	0.699008	0.542084
21	5	Female	1818.26	Large	0.402702	0.723078	0.630582	0.470974	0.372304	0.820792		0.927544	0.745528	0.540496
21	6	Female	1799.28	Large	0.447367	0.702201	0.722324	0.524754	0.438756	0.800357		0.918023	0.534175	0.46108
22	1	Female	1570.45	Small	0.458022	0.662863	0.644447	0.521414	0.539954	0.777025		0.89739	0.70246	0.537498
22	2	Female	1623.69	Small	0.423835	0.632132	0.69328	0.464371	0.425664	0.777266		0.897661	0.763432	0.601651
22	3	Female	1613.74	Small	0.454085	0.63947	0.675668	0.481076	0.457431	0.793481		0.901828	0.73792	0.53122
22	4	Female	1619.78	Small	0.419944	0.623845	0.667159	0.466741	0.421665	0.806839		0.902491	0.690935	0.563285
22	5	Female	1611.42	Small	0.412246	0.655722	0.685183	0.478742	0.446447	0.819015		0.934582	0.74854	0.56957
22	6	Female	1592.69	Small	0.471422	0.651491	0.632814	0.506524	0.497991	0.849643		0.879845	0.674735	0.575642
23	1	Female	1587.82	Small	0.447868	0.713214	0.704182	0.481292	0.478018	0.773684		0.899169	0.658132	0.566725
23	2	Female	1631.58	Small	0.440982	0.680797	0.681822	0.473413	0.468175	0.819254		0.90425	0.733991	0.571943
23	3	Female	1631.64	Small	0.436288	0.653907	0.704575	0.460916	0.478898	0.761634		0.927089	0.81708	0.592633
23	4	Female	1625.23	Small	0.417513	0.678293	0.694922	0.442843	0.499538	0.784747		0.927075	0.685291	0.587394
23	5	Female	1631.19	Small	0.424928	0.663568	0.701685	0.49577	0.450347	0.835304		0.938776	0.691505	0.560226
23	6	Female	1594.42	Small	0.447335	0.754935	0.688194	0.465912	0.511115	0.830442		0.894509	0.73406	0.561645
24	1	Female	1883.57	Large	0.433462	0.710573	0.824407	0.534475	0.489865	0.909006		0.920114	0.723562	0.542896
24	2	Female	1900.82	Large	0.420686	0.673896	0.683482	0.537326	0.445333	0.768537		0.916823	0.781926	0.508393
24	3	Female	1924.31	Large	0.459202	0.683361	0.701632	0.544333	0.470622	0.880843		0.897924	0.744429	0.464843
24	4	Female	1910.97	Large	0.420951	0.698423	0.706227	0.494823	0.423578	0.753031		0.919859	0.746446	0.504041
24	5	Female	1910.01	Large	0.428832	0.692535	0.688667	0.54561	0.477523	0.81357		0.91446	0.7757	0.591295
24	6	Female	1895.77	Large	0.458918	0.672993	0.815412	0.564092	0.491502	0.876412		0.841622	0.652756	0.546768
25	1	Female	1812.85	Large	0.451768	0.764336	0.830945	0.572108	0.478726	0.834491		0.869701	0.659962	0.583386
25	2	Female	1845.22	Large	0.432695	0.684203	0.654371	0.531009	0.500863	0.691669		0.878148	0.730924	0.577267
25	3	Female	1862.74	Large	0.42026	0.650625	0.813597	0.510163	0.478202	0.774395		0.873101	0.797448	0.495145
25	4	Female	1849.88	Large	0.426645	0.656901	0.660524	0.510094	0.459909	0.815347		0.896959	0.775841	0.526439
25	5	Female	1846.94	Large	0.435126	0.6697	0.690303	0.485984	0.4481	0.824422		0.905191	0.699025	0.548309
25	6	Female	1828.39	Large	0.459076	0.719151	0.684011	0.560243	0.413595	0.914546		0.877541	0.73055	0.563903
