# Supplementary material for: Uncovering a ‘sensitive window’ of multisensory and motor neuroplasticity in the cerebrum and cerebellum of male and female starlings
Source: eLife. 2021 Jun 7;10:e66777. doi: 10.7554/eLife.66777 (PMC8219385; doi:10.7554/eLife.66777)
Supplement: Figure 4—source data 1. [file elife-66777-fig4-data1.xlsx]

## Sheet: Sourcedata figure 4
subject_nr	time	sex	Brainsize	L/S	fd_M>F_Nidopallium_L	fd_M>F_HVC_RA_R	fd_M>F_RA_L	fd_M>F_HA_L	fd_M>F_LFS_R	fd_M>F_cerebellum_VIII		fd_F>M_tracts	fd_F>M_fieldL_R	fd_F>M_cerebellum		logfc_M>F_HA_L	logfc_M>F_HVC_L	logfc_M>F_cerebellum		logfc_F>M_Nidopallium_R	logfc_F>M_LFS_L	logfc_F>M_CMM_R
1	1	Male	1904.7	Large	0.49751	0.66255	0.45877	0.42733	0.35995	0.65857		0.51684	0.34936	0.52958		0.33514	0.32091	0.47373		0.11387	-0.071394	-0.084767
1	2	Male	1899.3	Large	0.46702	0.67568	0.47197	0.42897	0.36731	0.57258		0.51125	0.35864	0.49315		0.25887	0.24664	0.33786		0.19577	-0.090047	-0.11707
1	3	Male	1900.2	Large	0.49465	0.64705	0.4998	0.44796	0.37495	0.65405		0.52938	0.35893	0.5456		0.39401	0.29776	0.33189		0.18575	-0.12146	-0.063103
1	4	Male	1899	Large	0.48483	0.68025	0.45996	0.4259	0.37678	0.64129		0.56079	0.37913	0.5309		0.31393	0.2211	0.33428		0.17929	-0.077804	-0.0011663
1	5	Male	1896.7	Large	0.45512	0.6736	0.42202	0.38655	0.38366	0.59437		0.50693	0.35297	0.47589		0.21454	0.22852	0.25626		0.15401	0.0084095	-0.095981
1	6	Male	1904.7	Large	0.47909	0.60401	0.47237	0.40281	0.34601	0.77368		0.55556	0.36586	0.49647		0.23398	0.30822	0.46252		0.25384	-0.0024253	-0.066407
2	1	Male	1794.5	Small	0.48664	0.546	0.47362	0.43031	0.39788	0.68704		0.52617	0.35203	0.52617		0.29133	0.11816	0.34992		0.027143	-0.22267	-0.037087
2	2	Male	1776.3	Small	0.45832	0.56131	0.49381	0.41562	0.3572	0.65011		0.52596	0.3307	0.50118		0.18686	0.075223	0.29457		0.024517	-0.11318	-0.068626
2	3	Male	1777.5	Small	0.48023	0.59931	0.47224	0.43837	0.41253	0.61436		0.56162	0.36378	0.57055		0.28449	0.19092	0.27907		0.0087745	-0.21364	0.020062
2	4	Male	1772.9	Small	0.47008	0.61218	0.48775	0.40478	0.394	0.57871		0.58984	0.35589	0.56375		0.21773	0.11421	0.12684		0.050591	-0.16302	-0.0079654
2	5	Male	1755.2	Small	0.47675	0.67963	0.47692	0.43231	0.36795	0.55271		0.53875	0.36448	0.53324		0.2446	0.19869	0.08889		0.044804	-0.18653	-0.042056
2	6	Male	1794.5	Small	0.46089	0.60947	0.47297	0.42933	0.38917	0.64336		0.52909	0.36511	0.50721		0.22576	0.19294	0.26367		0.048307	-0.18181	-0.098038
3	1	Male	1777.3	Small	0.48628	0.57516	0.4738	0.45205	0.39476	0.66017		0.52031	0.34991	0.52708		0.34311	0.337	0.39718		0.035753	-0.08488	-0.208
3	2	Male	1773.3	Small	0.4608	0.64751	0.50195	0.44631	0.40564	0.70407		0.5253	0.33571	0.50106		0.34945	0.27769	0.34117		0.051599	-0.088157	-0.16421
3	3	Male	1775.2	Small	0.45744	0.63682	0.47834	0.41382	0.37788	0.66371		0.56682	0.36597	0.55214		0.20589	0.21044	0.29887		0.022277	-0.015006	0.020366
3	4	Male	1772.3	Small	0.46574	0.61771	0.48598	0.42981	0.40443	0.63502		0.56143	0.3542	0.51369		0.2867	0.29374	0.33309		0.082911	-0.036924	-0.097608
3	5	Male	1770.6	Small	0.45987	0.63882	0.48446	0.40355	0.40377	0.70118		0.53446	0.33131	0.52909		0.24466	0.25267	0.3378		0.045901	-0.001025	-0.19177
3	6	Male	1777.3	Small	0.46808	0.62247	0.46991	0.41043	0.36247	0.75454		0.5559	0.35616	0.54308		0.26116	0.21648	0.35274		0.10146	-0.0071558	-0.046722
4	1	Male	1812	Small	0.4688	0.68062	0.4563	0.42391	0.42021	0.69407		0.52654	0.36949	0.57023		0.20993	0.19944	0.35626		0.10145	-0.085141	-0.05942
4	2	Male	1802.2	Small	0.47121	0.68958	0.47014	0.42936	0.35751	0.69761		0.52241	0.36387	0.562		0.27137	0.21214	0.39076		0.10689	-0.14008	-0.10675
4	3	Male	1801.7	Small	0.51299	0.72712	0.47405	0.43922	0.3901	0.76748		0.55253	0.38751	0.54281		0.33076	0.17317	0.30812		0.010501	-0.17341	-0.046253
4	4	Male	1801.4	Small	0.45145	0.66897	0.44708	0.4056	0.33999	0.64908		0.57971	0.35563	0.55917		0.2176	0.12814	0.2301		0.14874	-0.018329	-0.058672
4	5	Male	1800.3	Small	0.46384	0.64547	0.44935	0.41881	0.33196	0.65536		0.55058	0.36207	0.55518		0.18697	0.19415	0.18717		0.15022	-0.065993	-0.087516
4	6	Male	1812	Small	0.47507	0.64044	0.47383	0.42038	0.35205	0.70873		0.58319	0.37173	0.55201		0.24568	0.18773	0.23406		0.086457	-0.065318	0.018083
5	1	Male	1929.32	Large	0.46499	0.62644	0.42594	0.44837	0.37051	0.60305		0.5328	0.34702	0.54619		0.3571	0.27672	0.1731		0.030874	-0.052696	0.010811
5	2	Male	1909.34	Large	0.45264	0.56731	0.41873	0.40722	0.36565	0.48879		0.54338	0.34845	0.52706		0.16034	0.15131	0.003772		0.073713	0.036721	0.026248
6	1	Male	1807.6	Small	0.46066	0.56508	0.48753	0.43039	0.35695	0.66406		0.52505	0.33046	0.54823		0.30457	0.22653	0.43127		0.0046026	-0.14012	-0.057822
6	2	Male	1803.9	Small	0.48566	0.6978	0.50133	0.45114	0.36107	0.65894		0.53154	0.35125	0.53985		0.39585	0.24256	0.40319		0.048043	-0.18864	-0.014288
6	3	Male	1803.4	Small	0.48423	0.65996	0.50186	0.43988	0.36009	0.56514		0.51429	0.34104	0.51872		0.37067	0.28976	0.34046		0.018617	-0.18939	0.0020326
6	4	Male	1803.7	Small	0.4871	0.6031	0.44725	0.43354	0.41452	0.63221		0.55476	0.37363	0.53242		0.26456	0.23358	0.34302		0.026069	-0.015586	-0.047909
6	5	Male	1800.2	Small	0.45265	0.68489	0.48336	0.41009	0.35073	0.60959		0.51707	0.3601	0.46863		0.27249	0.2335	0.34508		0.036758	0.039361	-0.052085
6	6	Male	1807.6	Small	0.47442	0.58969	0.46023	0.41101	0.36877	0.65268		0.56334	0.35733	0.51789		0.22697	0.14879	0.26919		0.1025	0.0012762	-0.057675
7	1	Male	1861.8	Large	0.47494	0.56818	0.42793	0.42841	0.35893	0.7223		0.51888	0.36174	0.57151		0.32565	0.15822	0.35698		-0.087247	0.011546	-0.12059
7	2	Male	1860.8	Large	0.47562	0.63635	0.44415	0.43961	0.33429	0.79243		0.52093	0.34904	0.57024		0.35597	0.229	0.44582		-0.02349	-0.041387	-0.1508
7	3	Male	1859.2	Large	0.45212	0.61104	0.4371	0.39938	0.36162	0.67094		0.57624	0.37665	0.56844		0.24704	0.11095	0.31459		-0.013875	0.084882	-0.065433
7	5	Male	1855.8	Large	0.43636	0.60592	0.39583	0.39126	0.34478	0.66664		0.536	0.34152	0.56419		0.25167	0.094718	0.32404		-0.024935	0.13907	-0.24449
7	6	Male	1861.8	Large	0.44675	0.56958	0.45081	0.40579	0.34372	0.80348		0.55372	0.37115	0.51163		0.22539	0.18632	0.42446		0.063564	0.10781	-0.034457
8	1	Male	1739.3	Small	0.48182	0.55848	0.46357	0.43131	0.35128	0.69392		0.53356	0.35014	0.50729		0.32631	0.17132	0.21652		0.046446	-0.14877	-0.018466
8	2	Male	1725.4	Small	0.47035	0.66146	0.48057	0.42429	0.37033	0.7868		0.51768	0.3391	0.50309		0.31871	0.14858	0.45071		0.037067	-0.1085	-0.038244
8	3	Male	1724.9	Small	0.4964	0.72266	0.50028	0.44233	0.39136	0.77713		0.50323	0.35953	0.50516		0.29232	0.20937	0.32726		0.0062406	-0.1475	-0.020494
8	4	Male	1726.9	Small	0.46124	0.64623	0.47699	0.4105	0.3888	0.62718		0.55351	0.36799	0.47408		0.20796	0.12747	0.17426		0.043613	-0.035162	-0.051931
8	5	Male	1718.7	Small	0.44833	0.60993	0.50048	0.41086	0.38549	0.7771		0.53056	0.35405	0.53994		0.1778	0.1077	0.29038		0.080919	0.0024593	-0.077682
8	6	Male	1739.3	Small	0.43778	0.58242	0.43248	0.38022	0.38477	0.72665		0.55645	0.36034	0.51424		0.14827	0.044631	0.27616		0.10046	0.015857	-0.032109
9	1	Male	1813.5	Large	0.47792	0.67587	0.45951	0.42163	0.3623	0.73972		0.49909	0.35602	0.52179		0.26767	0.21465	0.33152		0.031124	0.0064837	-0.10488
9	2	Male	1809.8	Large	0.50891	0.73632	0.46424	0.43928	0.38436	0.81774		0.51123	0.3642	0.4797		0.33267	0.23682	0.4522		0.12057	-0.094606	-0.12002
9	3	Male	1808.2	Large	0.50482	0.70225	0.4876	0.44384	0.36481	0.75761		0.51187	0.35992	0.47346		0.37576	0.27842	0.36958		0.11448	-0.076104	-0.088771
9	4	Male	1811.2	Large	0.48324	0.70899	0.46569	0.43414	0.39935	0.7933		0.5277	0.36301	0.47606		0.26655	0.18053	0.37779		0.092626	-0.014272	-0.11037
9	5	Male	1807.1	Large	0.4901	0.647	0.4582	0.41867	0.35247	0.81076		0.51446	0.36423	0.48773		0.27808	0.20939	0.34222		0.095385	-0.018096	-0.031102
9	6	Male	1813.5	Large	0.47763	0.67822	0.45055	0.40604	0.4	0.8035		0.55375	0.38721	0.54314		0.24994	0.30644	0.44376		0.17311	0.05867	-0.12841
10	1	Male	1973.1	Large	0.48273	0.64983	0.47755	0.41653	0.33828	0.6302		0.50775	0.35002	0.57077		0.33734	0.31082	0.30892		0.11905	-0.040599	0.02904
10	2	Male	1953.5	Large	0.47108	0.63424	0.43472	0.43978	0.36845	0.56606		0.55719	0.37946	0.53662		0.52421	0.2811	0.19698		0.15261	-0.14621	0.0063625
10	3	Male	1953.4	Large	0.48882	0.68262	0.47184	0.45136	0.4245	0.62427		0.52204	0.36984	0.53034		0.47491	0.35787	0.27671		0.16573	-0.14367	0.034771
10	4	Male	1948.4	Large	0.47033	0.65772	0.4608	0.41265	0.35566	0.62898		0.56815	0.3768	0.5341		0.35473	0.24735	0.30844		0.12221	-0.032626	0.12576
10	5	Male	1945.1	Large	0.42132	0.59406	0.44897	0.39158	0.36957	0.48617		0.55612	0.36474	0.4757		0.33441	0.22898	0.1439		0.14268	-0.023165	-0.05606
10	6	Male	1973.1	Large	0.44738	0.62376	0.4429	0.39934	0.34721	0.63318		0.5596	0.35976	0.46725		0.29363	0.26008	0.12039		0.14586	0.0064532	0.088886
11	1	Male	1862.5	Large	0.50178	0.76434	0.49034	0.44548	0.37854	0.69805		0.52365	0.35076	0.53459		0.35091	0.29295	0.37508		0.067779	-0.17526	-0.13504
11	2	Male	1851.5	Large	0.50998	0.72522	0.49173	0.46288	0.38794	0.68273		0.51007	0.35409	0.48342		0.41696	0.21976	0.4102		0.12272	-0.23959	-0.079569
11	3	Male	1851.5	Large	0.52411	0.76481	0.50723	0.45163	0.3633	0.64281		0.50156	0.33555	0.50911		0.40722	0.31209	0.42851		0.090781	-0.2393	-0.041964
11	4	Male	1846.5	Large	0.48529	0.70115	0.50067	0.42064	0.35991	0.6806		0.54665	0.36514	0.53968		0.34294	0.17261	0.31538		0.098394	-0.13463	-0.09404
11	5	Male	1847.8	Large	0.44489	0.74268	0.44574	0.41691	0.40577	0.64261		0.5416	0.31676	0.5243		0.23294	0.16918	0.21133		0.014303	-0.069477	-0.18402
11	6	Male	1862.5	Large	0.48349	0.67148	0.49347	0.42057	0.35777	0.64891		0.56324	0.34815	0.53058		0.26964	0.16947	0.23807		0.18491	-0.11685	0.024693
12	1	Male	1758	Small	0.4787	0.63416	0.46932	0.42206	0.33248	0.59306		0.51299	0.35536	0.51134		0.23628	0.15083	0.40998		-0.027553	-0.049596	0.028614
12	2	Male	1740.5	Small	0.48803	0.65462	0.48149	0.43676	0.3546	0.58906		0.54368	0.36213	0.51298		0.37354	0.24762	0.25704		0.0038769	-0.17046	-0.026691
12	3	Male	1742.4	Small	0.44831	0.59927	0.43082	0.41502	0.39191	0.61525		0.4976	0.31261	0.47836		0.36896	0.18235	0.42599		-0.046951	-0.21666	-0.16143
12	4	Male	1743	Small	0.48323	0.61262	0.46291	0.40189	0.32832	0.64133		0.55648	0.37726	0.5042		0.21782	0.16255	0.34341		-0.010234	-0.066296	0.052081
12	5	Male	1741.7	Small	0.48661	0.64566	0.46263	0.4299	0.34207	0.67614		0.5457	0.35435	0.51614		0.31367	0.20366	0.35805		-0.020998	-0.17693	-0.033807
12	6	Male	1758	Small	0.44746	0.56708	0.45262	0.41739	0.34518	0.57797		0.55757	0.37171	0.45167		0.2085	0.21866	0.20272		0.049115	-0.07331	-0.0074564
13	1	Male	1744.5	Small	0.46356	0.60729	0.46938	0.43213	0.40206	0.6046		0.52286	0.34853	0.52191		0.32816	0.065825	0.43156		0.068055	-0.13991	-0.069021
13	2	Male	1731.3	Small	0.5069	0.67994	0.46247	0.45973	0.42387	0.74004		0.53661	0.37176	0.48876		0.41978	0.14397	0.47113		0.022106	-0.11725	-0.040534
13	3	Male	1734	Small	0.49032	0.62593	0.47488	0.44974	0.42218	0.5669		0.49772	0.35098	0.44877		0.42668	0.026905	0.34274		-0.00053337	-0.23175	-0.026522
13	4	Male	1734.2	Small	0.44271	0.6054	0.44786	0.39892	0.36017	0.64862		0.54125	0.36207	0.49286		0.27388	0.017818	0.35698		0.072797	-0.04299	-0.13462
13	5	Male	1731.3	Small	0.42577	0.60031	0.42249	0.37506	0.35382	0.72234		0.53216	0.37173	0.50858		0.18697	-0.023143	0.31969		0.05809	-0.056268	-0.054194
13	6	Male	1744.5	Small	0.45423	0.58106	0.46209	0.43534	0.34914	0.67426		0.55768	0.38719	0.49289		0.35309	0.10712	0.38152		0.11939	-0.097048	-0.036785
14	1	Female	1889.06	Large	0.42741	0.50582	0.43514	0.37479	0.35541	0.58787		0.60957	0.36932	0.59975		0.033984	0.084153	0.15695		0.25138	0.24464	0.23805
14	2	Female	1911.4	Large	0.45477	0.59359	0.4428	0.39583	0.33924	0.5922		0.59098	0.38705	0.63184		0.058518	0.18613	0.20403		0.25095	0.21466	0.10668
14	3	Female	1893.85	Large	0.43788	0.54164	0.43488	0.39203	0.34941	0.58609		0.60527	0.39045	0.58544		0.03527	0.062918	0.10074		0.24283	0.25115	0.12375
14	4	Female	1915.88	Large	0.44833	0.61593	0.42384	0.3758	0.34301	0.54228		0.6336	0.39622	0.61396		0.0052866	0.12178	0.064367		0.34138	0.27523	0.27212
14	5	Female	1913.93	Large	0.45153	0.61817	0.40701	0.38312	0.30908	0.50837		0.59978	0.37046	0.58813		-0.0092211	0.17459	0.21639		0.37024	0.24812	0.25411
14	6	Female	1905.85	Large	0.43928	0.54792	0.418	0.37408	0.27272	0.64925		0.54937	0.38029	0.53193		0.05667	0.12356	0.27784		0.19999	0.24672	0.04856
15	1	Female	1716.04	Small	0.38385	0.53933	0.39738	0.37993	0.31326	0.50174		0.56532	0.33737	0.59057		0.058382	-0.027144	-0.016417		0.23451	0.20036	0.043331
15	2	Female	1731.33	Small	0.42577	0.51424	0.39553	0.38994	0.31204	0.57026		0.58358	0.37978	0.60184		0.10883	-0.00064081	-0.036557		0.15694	0.09883	0.12374
15	3	Female	1712.76	Small	0.42961	0.45885	0.40941	0.39912	0.32909	0.55812		0.58958	0.35835	0.60828		0.12644	-0.045778	0.034467		0.23136	0.07589	0.14147
15	4	Female	1694.36	Small	0.43211	0.51371	0.44203	0.37403	0.33725	0.48295		0.62344	0.39405	0.61446		0.079093	-0.029434	-0.060744		0.29053	0.18319	0.054508
15	5	Female	1694.15	Small	0.40453	0.47375	0.43308	0.36354	0.31676	0.3453		0.66665	0.39663	0.61559		0.094926	-0.01835	-0.053136		0.23362	0.15244	0.16682
15	6	Female	1682.18	Small	0.43723	0.45409	0.3985	0.38161	0.30125	0.58498		0.57491	0.38677	0.57509		0.10491	-0.029716	0.00016722		0.16929	0.11993	0.093899
16	1	Female	1735.5	Small	0.39004	0.51604	0.37962	0.37435	0.36115	0.58857		0.60467	0.40791	0.55605		0.10853	-0.13931	0.18867		0.1785	0.15905	0.048446
16	2	Female	1734.15	Small	0.42696	0.53231	0.44228	0.38217	0.31465	0.53088		0.62241	0.41802	0.61593		0.21044	-0.14935	0.099209		0.19347	0.024249	0.16107
16	3	Female	1743.03	Small	0.40224	0.55011	0.40531	0.37946	0.33421	0.55099		0.62603	0.39782	0.60058		0.10786	-0.081813	0.13254		0.19922	0.093917	0.13785
16	4	Female	1739.23	Small	0.41692	0.51708	0.41482	0.38228	0.31486	0.44627		0.64895	0.41864	0.58493		0.10824	-0.057747	0.10887		0.25822	0.094079	0.2661
16	5	Female	1720.53	Small	0.43891	0.47194	0.40572	0.39608	0.32105	0.33533		0.65371	0.42201	0.61162		0.17152	-0.093565	0.069059		0.22545	0.033312	0.31277
16	6	Female	1749.24	Small	0.41522	0.51362	0.40995	0.38199	0.34646	0.49274		0.61397	0.39163	0.55094		0.11276	-0.11897	0.17972		0.20235	0.096979	0.083018
17	1	Female	1763.32	Small	0.41753	0.62836	0.37531	0.36985	0.30433	0.509		0.54928	0.34689	0.48265		-0.037993	-0.023934	0.28709		0.23361	0.17848	-0.13496
17	2	Female	1803.66	Small	0.46199	0.71159	0.46686	0.40686	0.33717	0.58285		0.55919	0.36881	0.59863		0.12437	0.085674	0.29665		0.073794	0.11049	-0.1174
17	3	Female	1820.24	Small	0.43272	0.59946	0.39741	0.38772	0.31221	0.56286		0.58567	0.37833	0.57573		0.038689	-0.014598	0.27207		0.28747	0.11967	-0.036581
17	4	Female	1795.84	Small	0.43022	0.61562	0.43285	0.39113	0.30444	0.59421		0.59369	0.3757	0.58566		0.058345	0.050061	0.28775		0.32027	0.20237	-0.04056
17	6	Female	1788.42	Small	0.43301	0.66636	0.43354	0.40916	0.31945	0.57611		0.55107	0.38107	0.5715		0.081649	0.06602	0.31341		0.26105	0.11193	-0.083202
18	1	Female	1590.88	Small	0.43879	0.5486	0.43103	0.40348	0.32726	0.57491		0.54036	0.36247	0.60537		0.24407	0.091489	0.15066		0.19698	0.002888	-0.058875
18	2	Female	1602.99	Small	0.42692	0.56644	0.40372	0.38847	0.34786	0.53757		0.55697	0.38528	0.60041		0.19485	0.022656	0.26272		0.19781	0.069617	-0.091602
18	3	Female	1597.51	Small	0.42754	0.51209	0.42067	0.39361	0.32067	0.56221		0.56124	0.38267	0.57534		0.1998	-0.011147	0.078566		0.16816	-0.0033613	-0.11324
18	4	Female	1591.26	Small	0.41825	0.49891	0.37818	0.36176	0.32322	0.46768		0.56532	0.38159	0.55377		0.048809	-0.057061	0.169		0.15141	0.10699	-0.0035509
18	5	Female	1603.09	Small	0.44441	0.52843	0.44322	0.38119	0.34884	0.53225		0.60609	0.39757	0.56671		0.12586	0.053457	0.034887		0.30665	0.11732	0.036908
18	6	Female	1585.02	Small	0.42156	0.50606	0.37067	0.3806	0.3114	0.65251		0.57109	0.41753	0.5228		0.22306	-0.037479	0.23297		0.22757	0.030307	-0.026707
19	1	Female	1829.28	Large	0.39904	0.51517	0.39667	0.35964	0.33475	0.63222		0.5641	0.35355	0.55082		0.0008521	0.087967	0.16983		0.26017	0.1954	-0.019563
19	2	Female	1849.5	Large	0.4364	0.55377	0.41118	0.38549	0.3376	0.61329		0.58762	0.3932	0.57765		0.080608	0.16851	0.24161		0.30545	0.14562	-0.081283
19	3	Female	1849.01	Large	0.39051	0.50885	0.41862	0.35735	0.30179	0.52997		0.59947	0.40796	0.58641		-0.014242	0.03958	0.18195		0.2287	0.18133	0.12568
19	4	Female	1848.94	Large	0.41769	0.54126	0.44002	0.37382	0.33489	0.52741		0.58984	0.38172	0.5947		-0.012969	0.13453	0.2239		0.33523	0.17531	-0.037987
19	5	Female	1849.15	Large	0.42867	0.58591	0.39142	0.35786	0.34652	0.48637		0.5759	0.38773	0.56632		-0.037161	0.12482	0.21962		0.27152	0.15921	-0.017799
19	6	Female	1835.9	Large	0.40385	0.46704	0.41817	0.36421	0.33536	0.51977		0.57277	0.3693	0.56481		-0.017908	0.06469	0.15643		0.1369	0.14349	-0.0045767
20	1	Female	1859.92	Large	0.45681	0.64961	0.45356	0.37585	0.3373	0.63987		0.56753	0.40419	0.60058		0.066001	0.22053	0.30811		0.25473	0.15224	0.2284
20	2	Female	1879.05	Large	0.43708	0.54163	0.45028	0.37365	0.3238	0.61482		0.63501	0.42036	0.57079		0.091394	0.17032	0.23109		0.32902	0.20633	0.29775
20	3	Female	1906.06	Large	0.45229	0.60343	0.46715	0.40765	0.32766	0.66117		0.57214	0.39715	0.56809		0.17478	0.24911	0.34919		0.2108	0.10016	0.21258
20	4	Female	1855.68	Large	0.4452	0.55601	0.41228	0.35997	0.35929	0.47747		0.57509	0.40536	0.57848		-0.034101	0.15494	0.37268		0.27383	0.19224	0.1804
20	5	Female	1889.02	Large	0.43588	0.55531	0.4296	0.36999	0.34055	0.56041		0.61145	0.38551	0.57688		0.027725	0.1731	0.266		0.28737	0.2143	0.23255
20	6	Female	1869	Large	0.43946	0.55078	0.47922	0.38782	0.333	0.55468		0.63129	0.45106	0.58953		0.11293	0.19776	0.22125		0.25813	0.17339	0.32967
21	1	Female	1799.61	Large	0.41261	0.51117	0.38865	0.37248	0.34629	0.52566		0.59532	0.37697	0.58994		0.085271	-0.19552	0.064629		0.31381	0.18716	0.15807
21	2	Female	1815.94	Large	0.43979	0.5274	0.41166	0.3851	0.3444	0.56535		0.6063	0.40457	0.58799		0.17172	-0.10365	0.09953		0.35787	0.11849	0.2588
21	3	Female	1830.13	Large	0.4253	0.46427	0.42075	0.38001	0.35628	0.55768		0.65608	0.41917	0.59204		0.1049	-0.15675	0.017714		0.40559	0.13558	0.32078
21	4	Female	1827.93	Large	0.4242	0.49157	0.41014	0.37991	0.3339	0.52811		0.61771	0.41465	0.58267		0.065112	-0.10941	0.10488		0.41465	0.16251	0.28791
21	5	Female	1818.26	Large	0.40458	0.46295	0.40744	0.37648	0.35216	0.59251		0.63898	0.40156	0.58226		0.095875	-0.11605	0.11849		0.37124	0.20831	0.32447
21	6	Female	1799.28	Large	0.45131	0.55536	0.43166	0.43121	0.36122	0.56116		0.55509	0.37947	0.57301		0.25077	0.025887	0.18791		0.4092	0.072368	0.14479
22	1	Female	1570.45	Small	0.39518	0.59183	0.39498	0.39594	0.36485	0.60995		0.55831	0.3306	0.54055		0.085045	0.027727	0.29463		0.076101	0.029353	-0.069915
22	2	Female	1623.69	Small	0.43457	0.49616	0.45318	0.40668	0.34805	0.69551		0.55968	0.37859	0.6168		0.1568	0.043293	0.31966		0.17924	-0.068464	0.035954
22	3	Female	1613.74	Small	0.43386	0.54506	0.39785	0.38182	0.36683	0.58743		0.57996	0.39136	0.60211		0.047897	-0.034047	0.28641		0.17415	0.01021	-0.070237
22	4	Female	1619.78	Small	0.42584	0.56913	0.41523	0.3714	0.33539	0.55629		0.58077	0.38083	0.56716		-0.031545	0.055764	0.22831		0.20706	0.094033	-0.074285
22	5	Female	1611.42	Small	0.41341	0.5238	0.38722	0.37319	0.32301	0.49061		0.61413	0.40801	0.61336		-0.0029134	-0.061173	0.12747		0.1907	0.064781	0.12502
22	6	Female	1592.69	Small	0.42513	0.48474	0.41289	0.37486	0.36671	0.55804		0.58892	0.39862	0.54643		-0.024992	-0.062694	0.18405		0.17092	0.08032	-0.027246
23	1	Female	1587.82	Small	0.39801	0.53108	0.40722	0.36072	0.37097	0.54672		0.54136	0.34727	0.55952		-0.096854	-0.21694	-0.046774		0.22119	0.12839	-0.0099367
23	2	Female	1631.58	Small	0.41235	0.4866	0.42229	0.37235	0.33981	0.55466		0.60455	0.37697	0.59502		7.8968e-05	-0.23026	-0.023706		0.23062	0.090606	0.12311
23	3	Female	1631.64	Small	0.42329	0.46445	0.45965	0.35987	0.32024	0.48534		0.62007	0.4172	0.62823		-0.045586	-0.26437	-0.18845		0.21945	0.11849	0.20575
23	4	Female	1625.23	Small	0.41779	0.48457	0.42903	0.35452	0.32359	0.56882		0.62713	0.40071	0.59895		-0.10097	-0.26159	-0.0944		0.23605	0.13413	0.20758
23	5	Female	1631.19	Small	0.40296	0.43481	0.44546	0.3594	0.33886	0.53959		0.62006	0.38936	0.60614		-0.12222	-0.21817	-0.22544		0.21268	0.16607	0.0054205
23	6	Female	1594.42	Small	0.40504	0.43727	0.44037	0.36663	0.34138	0.52867		0.61281	0.39782	0.59457		-0.098594	-0.22893	-0.13518		0.20387	0.14114	0.13107
24	1	Female	1883.57	Large	0.42906	0.57472	0.42253	0.39832	0.35002	0.51688		0.53997	0.36165	0.59004		0.25378	0.17165	0.26371		0.20438	-0.0029502	0.22928
24	2	Female	1900.82	Large	0.40822	0.51536	0.4161	0.38746	0.36657	0.48289		0.60973	0.38704	0.60458		0.19218	0.054599	0.30777		0.3084	0.11038	0.29426
24	3	Female	1924.31	Large	0.42934	0.55573	0.4416	0.41108	0.36489	0.62098		0.56411	0.37357	0.5936		0.22365	0.1839	0.28904		0.25082	0.021416	0.1405
24	4	Female	1910.97	Large	0.38885	0.53435	0.44401	0.37334	0.32707	0.49432		0.63112	0.4158	0.58543		0.14402	0.027798	0.17637		0.33395	0.08119	0.35982
24	5	Female	1910.01	Large	0.39423	0.52858	0.41822	0.36013	0.34887	0.48021		0.6113	0.37711	0.58086		0.13957	0.021212	0.18276		0.31994	0.12056	0.25381
24	6	Female	1895.77	Large	0.41448	0.57459	0.43888	0.40313	0.32929	0.52465		0.55022	0.3802	0.54288		0.21621	0.16118	0.28054		0.26045	0.028192	0.057323
25	1	Female	1812.85	Large	0.43243	0.56932	0.43113	0.37896	0.34945	0.43305		0.54887	0.37545	0.53587		0.25527	0.12957	-0.024978		0.16649	0.040674	0.20135
25	2	Female	1845.22	Large	0.43978	0.62702	0.4392	0.38207	0.3296	0.49061		0.54704	0.37984	0.61746		0.18769	0.19889	0.15055		0.22401	0.067395	0.11231
25	3	Female	1862.74	Large	0.42468	0.62021	0.46427	0.40627	0.3522	0.56562		0.58108	0.38779	0.59557		0.19433	0.25472	0.14376		0.31906	0.082293	0.10044
25	4	Female	1849.88	Large	0.40346	0.53588	0.43503	0.36857	0.35407	0.55611		0.61983	0.38905	0.62872		0.12828	0.1287	0.087884		0.23634	0.16779	0.13398
25	5	Female	1846.94	Large	0.42677	0.56891	0.44735	0.37153	0.30631	0.60004		0.6177	0.40174	0.59807		0.14037	0.14764	0.12123		0.23714	0.10632	0.16673
25	6	Female	1828.39	Large	0.40761	0.55592	0.44974	0.38225	0.36107	0.52887		0.59734	0.40868	0.59744		0.12668	0.13858	0.1756		0.19927	0.10314	0.27564
