# Supplementary material for: Uncovering a ‘sensitive window’ of multisensory and motor neuroplasticity in the cerebrum and cerebellum of male and female starlings
Source: eLife. 2021 Jun 7;10:e66777. doi: 10.7554/eLife.66777 (PMC8219385; doi:10.7554/eLife.66777)
Supplement: Figure 5—figure supplement 1—source data 1. [file elife-66777-fig5-figsupp1-data1.xlsx]

## Sheet: Sourcedata figure 5
subject_nr	time	sex	Brainsize	L/S	HVC_surr_L	hippocampus_L	HVC_surr_R	AreaX_caud_R	LPS_L	LPS_LFS_R	tFA_R	TrO_R	RA_surr_L	cerebellum_IV	cerebellum_VI	cerebellum_VII		NCM_L	LaM_R	Ventricle_rost_L	Ventricle_rost_R	Ventricle_caud_138	Ventricle_caud_122	TrO
1	1	Male	1904.7	Large	0.166395	0.14106	0.177083	0.278713	0.309699	0.248551	0.255477	0.374777	0.308888	0.310386	0.30893	0.339938		0.159925	0.1788	0.182229	0.183179	0.161616	0.179643	0.468304
1	2	Male	1899.3	Large	0.161496	0.146425	0.164479	0.292655	0.33545	0.246482	0.260012	0.365674	0.320165	0.285257	0.300446	0.338741		0.199484	0.202512	0.174627	0.181451	0.149777	0.19545	0.516249
1	3	Male	1900.2	Large	0.155016	0.125941	0.161062	0.279138	0.327994	0.221053	0.275776	0.417222	0.306328	0.328794	0.321827	0.340043		0.155741	0.20333	0.167643	0.169735	0.121727	0.19592	0.283598
1	4	Male	1899	Large	0.172558	0.137577	0.171629	0.303812	0.310646	0.224639	0.304507	0.377305	0.300848	0.325924	0.334789	0.368772		0.138229	0.206848	0.150233	0.168197	0.127703	0.175687	0.271173
1	5	Male	1896.7	Large	0.160484	0.1419	0.167492	0.274261	0.298523	0.230014	0.336798	0.388849	0.322138	0.302313	0.374436	0.388741		0.170099	0.181835	0.172458	0.18019	0.150128	0.18776	0.387186
1	6	Male	1904.7	Large	0.163794	0.128978	0.16031	0.304681	0.345649	0.234107	0.31829	0.421693	0.324369	0.309982	0.367234	0.370965		0.185479	0.19851	0.192092	0.188191	0.14885	0.184828	0.283294
2	1	Male	1794.5	Small	0.125325	0.103974	0.122178	0.246296	0.278343	0.246502	0.204161	0.401377	0.295966	0.305043	0.3022	0.356576		0.175362	0.203433	0.152183	0.214721	0.146804	0.200981	0.633504
2	2	Male	1776.3	Small	0.134211	0.102805	0.136037	0.249336	0.311988	0.22903	0.25158	0.388069	0.334494	0.322947	0.316722	0.374016		0.225693	0.204195	0.151037	0.198778	0.157452	0.192953	0.589006
2	3	Male	1777.5	Small	0.145692	0.124238	0.139841	0.255936	0.314124	0.237972	0.267179	0.358119	0.317277	0.316613	0.28645	0.386913		0.154107	0.216703	0.162951	0.196844	0.151366	0.200135	0.539037
2	4	Male	1772.9	Small	0.147015	0.124964	0.138744	0.272051	0.290235	0.249119	0.267304	0.413873	0.303157	0.324349	0.290259	0.384459		0.172116	0.222906	0.186063	0.206576	0.163103	0.22056	0.497237
2	5	Male	1755.2	Small	0.16097	0.127288	0.147258	0.267906	0.316375	0.22654	0.273752	0.428409	0.307719	0.324976	0.309506	0.359607		0.18309	0.209868	0.153695	0.196782	0.172035	0.21173	0.570243
2	6	Male	1794.5	Small	0.136816	0.105616	0.134257	0.255412	0.293006	0.219631	0.323537	0.366782	0.311213	0.304542	0.285909	0.374861		0.181745	0.212857	0.163463	0.208772	0.181853	0.23114	0.419446
3	1	Male	1777.3	Small	0.134513	0.135401	0.141024	0.267046	0.30795	0.253909	0.243966	0.382828	0.315437	0.271376	0.33014	0.370145		0.193369	0.209972	0.192191	0.236109	0.169804	0.21345	0.490347
3	2	Male	1773.3	Small	0.139859	0.131554	0.137809	0.283236	0.285958	0.224294	0.306138	0.377221	0.298823	0.282371	0.31764	0.370099		0.173262	0.212035	0.175093	0.21136	0.166927	0.198818	0.483532
3	3	Male	1775.2	Small	0.161631	0.156237	0.151929	0.273501	0.290513	0.228738	0.352776	0.381348	0.315546	0.299223	0.283129	0.413447		0.156654	0.198102	0.173646	0.204912	0.185087	0.196136	0.263007
3	4	Male	1772.3	Small	0.138955	0.133926	0.144345	0.279873	0.316587	0.224307	0.370196	0.397024	0.306825	0.290872	0.3396	0.392406		0.195724	0.212708	0.199468	0.231023	0.195416	0.200185	0.251899
3	5	Male	1770.6	Small	0.143196	0.129746	0.142456	0.270746	0.282887	0.231417	0.32102	0.399271	0.317873	0.288568	0.34487	0.425887		0.185021	0.208405	0.199492	0.221327	0.189227	0.192812	0.355853
3	6	Male	1777.3	Small	0.143408	0.123028	0.13924	0.293936	0.311544	0.225694	0.267369	0.404532	0.287588	0.264184	0.263781	0.371926		0.146025	0.198714	0.162472	0.21404	0.158116	0.189961	0.264593
4	1	Male	1812	Small	0.131491	0.116474	0.135926	0.256672	0.275738	0.233524	0.27304	0.414554	0.30344	0.304191	0.292141	0.345274		0.188214	0.200244	0.210145	0.213728	0.150456	0.195812	0.53205
4	2	Male	1802.2	Small	0.127089	0.123938	0.143392	0.280672	0.283667	0.226787	0.196733	0.364611	0.296215	0.333442	0.318802	0.370835		0.173132	0.190865	0.170478	0.203033	0.138675	0.220382	0.469763
4	3	Male	1801.7	Small	0.136642	0.121449	0.151343	0.26733	0.272304	0.227095	0.215429	0.334609	0.30978	0.323812	0.312511	0.374621		0.155227	0.195255	0.181632	0.177903	0.147243	0.195332	0.4018
4	4	Male	1801.4	Small	0.132249	0.110057	0.138001	0.293537	0.251266	0.240226	0.229239	0.339005	0.306595	0.318349	0.321747	0.366354		0.166191	0.183286	0.184271	0.180236	0.153319	0.201723	0.287836
4	5	Male	1800.3	Small	0.134102	0.119531	0.147454	0.262424	0.29699	0.214181	0.262284	0.420217	0.306902	0.315156	0.26651	0.345732		0.163365	0.192732	0.196984	0.201627	0.141039	0.207334	0.451174
4	6	Male	1812	Small	0.134344	0.113083	0.14075	0.282669	0.272525	0.216572	0.208721	0.401239	0.301615	0.332587	0.293829	0.354065		0.154054	0.206646	0.184802	0.188247	0.127298	0.206155	0.302373
5	1	Male	1929.32	Large	0.127646	0.134545	0.140242	0.276327	0.309949	0.225802	0.310779	0.404002	0.304762	0.252654	0.222834	0.339317		0.144942	0.175783	0.157103	0.174739	0.119188	0.19463	0.456979
5	2	Male	1909.34	Large	0.145623	0.149698	0.161762	0.296671	0.331502	0.24091	0.313616	0.446317	0.295828	0.281156	0.239659	0.277434		0.152753	0.184681	0.141121	0.168367	0.130542	0.177112	0.45987
6	1	Male	1807.6	Small	0.13363	0.116143	0.13162	0.276052	0.282309	0.210159	0.258194	0.363002	0.310204	0.306619	0.313901	0.341273		0.172467	0.202697	0.192229	0.201679	0.14498	0.190336	0.52888
6	2	Male	1803.9	Small	0.156022	0.11944	0.156347	0.287284	0.315313	0.204736	0.263507	0.413039	0.305318	0.302983	0.335026	0.357461		0.136928	0.213246	0.170626	0.209291	0.15268	0.19425	0.533753
6	3	Male	1803.4	Small	0.148165	0.121252	0.146706	0.320115	0.294453	0.207761	0.277258	0.387912	0.303111	0.330928	0.33919	0.351661		0.159819	0.194152	0.189312	0.210961	0.163101	0.181603	0.488239
6	4	Male	1803.7	Small	0.142667	0.106962	0.128565	0.289475	0.293437	0.208181	0.285921	0.399371	0.2897	0.309876	0.305321	0.371077		0.17329	0.212781	0.19825	0.221487	0.157273	0.200369	0.446991
6	5	Male	1800.2	Small	0.157678	0.144284	0.147857	0.28928	0.278699	0.206793	0.281005	0.398477	0.314468	0.352929	0.333084	0.426871		0.172735	0.201736	0.210606	0.220615	0.162995	0.221568	0.488202
6	6	Male	1807.6	Small	0.125535	0.0973165	0.126036	0.273642	0.28538	0.234351	0.205664	0.386932	0.287381	0.260739	0.335005	0.34699		0.157182	0.200441	0.175992	0.214355	0.137462	0.223935	0.428542
7	1	Male	1861.8	Large	0.146752	0.121623	0.15805	0.270455	0.31086	0.22998	0.226184	0.384676	0.312109	0.272993	0.274133	0.367506		0.167683	0.190104	0.158721	0.16507	0.128931	0.199696	0.486174
7	2	Male	1860.8	Large	0.155603	0.133066	0.160272	0.28147	0.297303	0.235305	0.262207	0.414761	0.319616	0.285403	0.32326	0.39355		0.161471	0.180056	0.15641	0.172486	0.127074	0.203451	0.471306
7	3	Male	1859.2	Large	0.142973	0.124355	0.153927	0.289813	0.324224	0.240424	0.345956	0.40937	0.318015	0.30125	0.317368	0.393135		0.176706	0.186809	0.180019	0.180617	0.143342	0.199117	0.355576
7	5	Male	1855.8	Large	0.141451	0.119451	0.156703	0.280856	0.313311	0.255015	0.397842	0.421048	0.315064	0.328698	0.351009	0.415821		0.174768	0.186618	0.184402	0.184	0.139869	0.195116	0.425468
7	6	Male	1861.8	Large	0.14909	0.124174	0.157644	0.302661	0.336404	0.2272	0.432867	0.43031	0.31436	0.297468	0.374341	0.409164		0.154328	0.184957	0.180583	0.179749	0.133418	0.202405	0.367303
8	1	Male	1739.3	Small	0.133062	0.127097	0.153487	0.258818	0.276793	0.216278	0.270969	0.37176	0.291759	0.296221	0.306766	0.350621		0.170617	0.212089	0.144929	0.189284	0.151183	0.181524	0.476021
8	2	Male	1725.4	Small	0.154354	0.121471	0.160374	0.261439	0.30242	0.210864	0.229462	0.337255	0.295604	0.292213	0.299275	0.364839		0.188609	0.198303	0.174211	0.183895	0.168072	0.193906	0.447357
8	3	Male	1724.9	Small	0.171222	0.136909	0.158916	0.283377	0.304304	0.222971	0.278444	0.330339	0.302328	0.291275	0.298174	0.368624		0.192335	0.209919	0.184707	0.18346	0.193191	0.177191	0.43253
8	4	Male	1726.9	Small	0.163606	0.127501	0.154939	0.28085	0.297316	0.239495	0.359118	0.333964	0.298131	0.310584	0.295004	0.384392		0.157891	0.190173	0.190422	0.209122	0.173932	0.170144	0.454533
8	5	Male	1718.7	Small	0.16706	0.137251	0.163152	0.257112	0.291811	0.217712	0.257807	0.315697	0.330694	0.301892	0.291609	0.415125		0.157878	0.197467	0.186657	0.192401	0.178845	0.206644	0.385913
8	6	Male	1739.3	Small	0.130396	0.118294	0.134161	0.252725	0.293716	0.227195	0.248873	0.335704	0.287414	0.283509	0.290399	0.360061		0.171214	0.185014	0.185155	0.208329	0.14688	0.171949	0.36815
9	1	Male	1813.5	Large	0.166582	0.127941	0.164262	0.270344	0.315277	0.251993	0.226373	0.385146	0.327721	0.315101	0.313025	0.403596		0.176037	0.156071	0.173365	0.181042	0.143128	0.173895	0.4715
9	2	Male	1809.8	Large	0.17459	0.13392	0.173897	0.285571	0.319508	0.230487	0.210042	0.411443	0.332935	0.324129	0.333995	0.395716		0.200293	0.169251	0.162643	0.173557	0.155698	0.187946	0.393248
9	3	Male	1808.2	Large	0.176526	0.134166	0.167878	0.278965	0.305182	0.225976	0.245085	0.40566	0.330118	0.343536	0.37673	0.41886		0.187194	0.170633	0.179342	0.175415	0.157974	0.168763	0.249124
9	4	Male	1811.2	Large	0.171366	0.123835	0.164768	0.301623	0.326067	0.252848	0.269922	0.380438	0.322782	0.328793	0.358109	0.390155		0.18398	0.180179	0.178961	0.193131	0.150668	0.200345	0.229103
9	5	Male	1807.1	Large	0.176377	0.134793	0.164812	0.272058	0.300681	0.22518	0.281163	0.417241	0.329594	0.3238	0.34893	0.427948		0.17714	0.169679	0.181603	0.177052	0.153552	0.173784	0.412959
9	6	Male	1813.5	Large	0.177155	0.133756	0.169465	0.281289	0.337057	0.255656	0.26306	0.483467	0.329004	0.330039	0.371791	0.431914		0.16976	0.185525	0.200865	0.209856	0.154477	0.190395	0.262164
10	1	Male	1973.1	Large	0.173612	0.124089	0.165878	0.306613	0.316501	0.232653	0.25943	0.376923	0.301729	0.286813	0.317375	0.36283		0.144443	0.170283	0.142094	0.164084	0.12432	0.19156	0.450525
10	2	Male	1953.5	Large	0.192909	0.139436	0.163978	0.315961	0.338457	0.229898	0.28154	0.395489	0.317805	0.297126	0.330555	0.375255		0.159398	0.196633	0.162101	0.199313	0.135349	0.196091	0.332672
10	3	Male	1953.4	Large	0.180403	0.139743	0.169	0.278886	0.29768	0.227449	0.250172	0.362826	0.304437	0.289209	0.323035	0.376619		0.15443	0.186464	0.172026	0.173975	0.132669	0.198325	0.258108
10	4	Male	1948.4	Large	0.186036	0.137242	0.166415	0.312622	0.328497	0.221402	0.293196	0.435149	0.309142	0.305551	0.289988	0.394646		0.129486	0.178549	0.164053	0.177649	0.122141	0.204014	0.302375
10	5	Male	1945.1	Large	0.19749	0.12998	0.167701	0.31972	0.319802	0.261132	0.318987	0.431854	0.298121	0.314691	0.312131	0.396192		0.150787	0.189937	0.193108	0.186448	0.128702	0.188156	0.478113
10	6	Male	1973.1	Large	0.179856	0.133887	0.159983	0.307358	0.329326	0.239466	0.28819	0.408206	0.306991	0.299156	0.298641	0.385398		0.138996	0.168984	0.18002	0.190991	0.128465	0.197422	0.305571
11	1	Male	1862.5	Large	0.153613	0.139201	0.173724	0.317753	0.319967	0.255281	0.232458	0.331203	0.331767	0.338922	0.29536	0.363272		0.145391	0.164793	0.149316	0.170957	0.140622	0.172563	0.484023
11	2	Male	1851.5	Large	0.154538	0.15045	0.160845	0.277802	0.306119	0.216244	0.26821	0.369304	0.31579	0.341191	0.322462	0.385259		0.155344	0.153657	0.148118	0.162171	0.145343	0.183358	0.479882
11	3	Male	1851.5	Large	0.191068	0.155632	0.174803	0.26912	0.347302	0.216351	0.287353	0.368494	0.310757	0.300325	0.289091	0.356345		0.142197	0.168103	0.134772	0.158869	0.149233	0.174821	0.438512
11	4	Male	1846.5	Large	0.173683	0.155705	0.175103	0.287137	0.308865	0.247409	0.280096	0.398119	0.312524	0.35007	0.32514	0.385722		0.127471	0.155914	0.157458	0.168019	0.136357	0.191027	0.401242
11	5	Male	1847.8	Large	0.164179	0.15216	0.162986	0.284951	0.335841	0.248194	0.304794	0.41164	0.33345	0.358008	0.337182	0.411645		0.150605	0.163381	0.151533	0.168961	0.141813	0.187953	0.438031
11	6	Male	1862.5	Large	0.161329	0.151932	0.162291	0.3099	0.302791	0.241088	0.362189	0.440536	0.324705	0.334384	0.318021	0.371365		0.127088	0.164498	0.146938	0.164608	0.135789	0.183227	0.44404
12	1	Male	1758	Small	0.148062	0.121548	0.146902	0.277983	0.306196	0.224153	0.246402	0.358744	0.286288	0.262637	0.245699	0.339498		0.149982	0.17932	0.180612	0.197018	0.137493	0.219692	0.489414
12	2	Male	1740.5	Small	0.143969	0.107172	0.138681	0.269472	0.265301	0.233575	0.252528	0.358481	0.294145	0.277688	0.259678	0.34357		0.165983	0.206657	0.199942	0.218592	0.151666	0.201809	0.482259
12	3	Male	1742.4	Small	0.163779	0.131087	0.172824	0.295601	0.327468	0.277645	0.286597	0.350307	0.282071	0.300413	0.269371	0.369608		0.197165	0.25362	0.210074	0.246351	0.188149	0.227643	0.431395
12	4	Male	1743	Small	0.165802	0.109023	0.157291	0.288295	0.292908	0.222014	0.248579	0.347595	0.288605	0.283181	0.264339	0.373338		0.130857	0.193935	0.166088	0.200978	0.119433	0.198382	0.514898
12	5	Male	1741.7	Small	0.162983	0.114762	0.151211	0.281714	0.293565	0.227444	0.260267	0.384068	0.305699	0.30346	0.272654	0.386448		0.133661	0.191558	0.186745	0.192798	0.141469	0.197865	0.476596
12	6	Male	1758	Small	0.151558	0.11603	0.147451	0.27525	0.30291	0.221594	0.281639	0.360548	0.283112	0.322483	0.292864	0.355047		0.192976	0.210068	0.212121	0.231932	0.179346	0.205735	0.432773
13	1	Male	1744.5	Small	0.143742	0.107827	0.148247	0.291587	0.3287	0.240538	0.247218	0.360236	0.288811	0.274377	0.289267	0.334214		0.192099	0.211721	0.193484	0.222518	0.160875	0.209709	0.447163
13	2	Male	1731.3	Small	0.141384	0.11667	0.146058	0.286635	0.27334	0.209748	0.26584	0.361696	0.289875	0.304182	0.308439	0.339615		0.164247	0.18502	0.176293	0.199457	0.146809	0.203617	0.358139
13	3	Male	1734	Small	0.166001	0.1407	0.166175	0.309521	0.306117	0.230603	0.243956	0.333738	0.274351	0.291785	0.294056	0.380603		0.171365	0.1793	0.143605	0.194015	0.168034	0.204654	0.408847
13	4	Male	1734.2	Small	0.141547	0.101973	0.131485	0.301463	0.288415	0.227689	0.267639	0.380884	0.268425	0.287632	0.311192	0.335199		0.157361	0.188202	0.184405	0.19791	0.146173	0.225672	0.375043
13	5	Male	1731.3	Small	0.146754	0.121215	0.150688	0.29023	0.286754	0.225388	0.270871	0.383263	0.284797	0.323541	0.310701	0.386324		0.136221	0.178748	0.179112	0.21034	0.156898	0.207168	0.429754
13	6	Male	1744.5	Small	0.157536	0.104192	0.139318	0.280447	0.300627	0.24741	0.271587	0.381199	0.293289	0.307342	0.326228	0.374181		0.175742	0.205106	0.183312	0.222335	0.16738	0.206303	0.264819
14	1	Female	1889.06	Large	0.165919	0.133602	0.168094	0.312159	0.299508	0.221038	0.281971	0.468559	0.335989	0.312186	0.342086	0.388362		0.139968	0.177149	0.114269	0.162904	0.113241	0.205433	0.308891
14	2	Female	1911.4	Large	0.159305	0.11804	0.177967	0.314447	0.305165	0.233532	0.30271	0.467607	0.35351	0.316512	0.372542	0.395321		0.1451	0.170878	0.156629	0.168697	0.136266	0.20855	0.276106
14	3	Female	1893.85	Large	0.160413	0.128175	0.159161	0.318807	0.311082	0.245714	0.322291	0.399436	0.348442	0.332531	0.333116	0.383075		0.132946	0.175489	0.172055	0.188623	0.135813	0.205085	0.357609
14	4	Female	1915.88	Large	0.157303	0.131024	0.159229	0.33779	0.305394	0.242615	0.302693	0.440179	0.358712	0.349994	0.346484	0.393294		0.128026	0.18374	0.140537	0.176773	0.126356	0.217876	0.145605
14	5	Female	1913.93	Large	0.176608	0.139782	0.164426	0.331251	0.30621	0.246221	0.310204	0.463924	0.357442	0.34414	0.325911	0.379942		0.134041	0.183109	0.117034	0.172195	0.123344	0.196778	0.181691
14	6	Female	1905.85	Large	0.170563	0.136253	0.182936	0.3193	0.308709	0.273769	0.315139	0.419571	0.360929	0.322662	0.378838	0.429911		0.158629	0.194089	0.178965	0.185517	0.138498	0.228102	0.327934
15	1	Female	1716.04	Small	0.12912	0.118896	0.129904	0.281146	0.261072	0.212808	0.348631	0.423796	0.313535	0.302926	0.309009	0.300302		0.187946	0.200187	0.160745	0.199496	0.14201	0.212054	0.386772
15	2	Female	1731.33	Small	0.130468	0.104227	0.129688	0.296111	0.277021	0.20414	0.24493	0.431087	0.316045	0.300364	0.311076	0.303176		0.153756	0.199403	0.151146	0.180691	0.137433	0.186133	0.440166
15	3	Female	1712.76	Small	0.121623	0.109441	0.124552	0.297278	0.289147	0.198113	0.273699	0.463263	0.328357	0.317924	0.325047	0.321004		0.171828	0.192544	0.180562	0.187614	0.142721	0.197387	0.441976
15	4	Female	1694.36	Small	0.125265	0.102056	0.127845	0.308763	0.278674	0.237952	0.262114	0.439643	0.328618	0.305595	0.335037	0.334781		0.176542	0.200309	0.181639	0.195325	0.153555	0.198205	0.371138
15	5	Female	1694.15	Small	0.125879	0.103012	0.137672	0.295458	0.312432	0.213756	0.289852	0.437399	0.328637	0.333374	0.327287	0.371366		0.205807	0.177887	0.170836	0.19078	0.157468	0.210347	0.302567
15	6	Female	1682.18	Small	0.127311	0.108868	0.128061	0.284384	0.27371	0.227511	0.278719	0.428078	0.311802	0.293519	0.300374	0.306088		0.163293	0.183479	0.160297	0.182727	0.135216	0.195402	0.330455
16	1	Female	1735.5	Small	0.138228	0.130028	0.151325	0.255517	0.283995	0.232011	0.280028	0.410883	0.292108	0.295891	0.274935	0.344875		0.201437	0.177148	0.150242	0.189372	0.151306	0.201954	0.537614
16	2	Female	1734.15	Small	0.14108	0.114335	0.141275	0.259534	0.295889	0.210986	0.29273	0.409623	0.302518	0.296941	0.292319	0.347972		0.196748	0.180119	0.147097	0.17854	0.13469	0.200236	0.451743
16	3	Female	1743.03	Small	0.145732	0.125814	0.154076	0.293652	0.301678	0.206099	0.303369	0.449468	0.317523	0.330506	0.292255	0.35264		0.16687	0.181891	0.133963	0.181843	0.128687	0.207659	0.431705
16	4	Female	1739.23	Small	0.139965	0.127218	0.136932	0.274812	0.294841	0.231547	0.279299	0.448117	0.309732	0.298307	0.272978	0.359178		0.203165	0.187401	0.144398	0.194753	0.128489	0.21294	0.459526
16	5	Female	1720.53	Small	0.145558	0.121719	0.15494	0.284407	0.299657	0.197496	0.220561	0.414091	0.324488	0.306601	0.297074	0.390633		0.181089	0.189702	0.122954	0.183766	0.131074	0.219404	0.41816
16	6	Female	1749.24	Small	0.134915	0.121174	0.152311	0.265723	0.28765	0.220333	0.280891	0.394571	0.322991	0.306052	0.29954	0.355802		0.201576	0.1649	0.147581	0.193637	0.145172	0.223772	0.429761
17	1	Female	1763.32	Small	0.12284	0.109709	0.149057	0.295176	0.262434	0.240455	0.242136	0.354434	0.324761	0.238897	0.274545	0.334861		0.170187	0.219528	0.155106	0.189223	0.145352	0.222067	0.309131
17	2	Female	1803.66	Small	0.121464	0.110947	0.140286	0.291947	0.284586	0.227159	0.284092	0.41324	0.330216	0.298349	0.279616	0.366175		0.187349	0.219499	0.163653	0.186567	0.156614	0.210597	0.357277
17	3	Female	1820.24	Small	0.134534	0.10237	0.130835	0.299357	0.304548	0.223672	0.219073	0.373176	0.327209	0.280298	0.271456	0.352952		0.147618	0.202392	0.157283	0.179402	0.137883	0.21442	0.190555
17	4	Female	1795.84	Small	0.128505	0.104747	0.132238	0.290969	0.283958	0.231883	0.354618	0.398133	0.343173	0.290061	0.285434	0.39232		0.17199	0.224447	0.163493	0.189314	0.155341	0.22156	0.262197
17	6	Female	1788.42	Small	0.132014	0.106104	0.141661	0.297919	0.272482	0.226382	0.23789	0.38545	0.318521	0.293964	0.282623	0.351597		0.155124	0.209464	0.166835	0.17601	0.143023	0.209511	0.268465
18	1	Female	1590.88	Small	0.124143	0.117369	0.140159	0.246981	0.291657	0.203778	0.263251	0.385777	0.306712	0.270262	0.304742	0.337914		0.159991	0.177119	0.165145	0.17783	0.137252	0.203262	0.406814
18	2	Female	1602.99	Small	0.132625	0.108879	0.147139	0.277627	0.328417	0.238126	0.260027	0.402138	0.315734	0.316607	0.277385	0.371139		0.181964	0.174111	0.175217	0.211598	0.146144	0.215217	0.403751
18	3	Female	1597.51	Small	0.126605	0.0897078	0.139625	0.266427	0.293048	0.20979	0.266336	0.357233	0.310117	0.32986	0.341721	0.342611		0.159102	0.175616	0.174255	0.197083	0.118569	0.215978	0.406877
18	4	Female	1591.26	Small	0.120358	0.12149	0.142044	0.252974	0.294125	0.214059	0.234356	0.361645	0.321149	0.283139	0.308353	0.329233		0.163501	0.185523	0.17462	0.193466	0.139282	0.210746	0.380956
18	5	Female	1603.09	Small	0.125485	0.106113	0.138757	0.271789	0.2904	0.226331	0.231908	0.440691	0.316188	0.302095	0.304035	0.37642		0.17545	0.189048	0.191059	0.188927	0.140717	0.206136	0.355129
18	6	Female	1585.02	Small	0.121111	0.101796	0.13739	0.255126	0.285761	0.215463	0.279108	0.400902	0.312806	0.394298	0.311231	0.370883		0.192406	0.172773	0.246475	0.199367	0.169523	0.221477	0.399518
19	1	Female	1829.28	Large	0.147959	0.129055	0.167862	0.289523	0.313313	0.240083	0.300681	0.50065	0.339395	0.329582	0.307104	0.387596		0.15112	0.190752	0.154707	0.167047	0.132017	0.174446	0.227417
19	2	Female	1849.5	Large	0.143597	0.132836	0.155786	0.294772	0.318377	0.256328	0.33141	0.410974	0.332542	0.353496	0.331686	0.382471		0.145196	0.189617	0.167345	0.164012	0.141955	0.181844	0.220201
19	3	Female	1849.01	Large	0.151678	0.141185	0.162387	0.291832	0.319774	0.26869	0.2982	0.476613	0.342596	0.354204	0.300717	0.374243		0.134551	0.188915	0.130329	0.170712	0.121834	0.175429	0.170236
19	4	Female	1848.94	Large	0.150212	0.126342	0.153535	0.307995	0.347868	0.264565	0.318506	0.493885	0.349012	0.340027	0.314111	0.372167		0.143728	0.209806	0.173929	0.175267	0.133676	0.187229	0.285754
19	5	Female	1849.15	Large	0.151591	0.126469	0.162736	0.301603	0.315907	0.248953	0.336248	0.437891	0.352779	0.342189	0.31519	0.374959		0.144033	0.177694	0.11924	0.159406	0.118006	0.179841	0.285836
19	6	Female	1835.9	Large	0.148772	0.133687	0.164622	0.295525	0.313518	0.237403	0.31948	0.428819	0.326604	0.344424	0.30555	0.395437		0.119539	0.181941	0.144961	0.151749	0.12362	0.171355	0.219711
20	1	Female	1859.92	Large	0.136835	0.128424	0.161304	0.303637	0.287744	0.242529	0.254599	0.413692	0.334392	0.326455	0.333863	0.367348		0.161601	0.189391	0.127632	0.18953	0.152968	0.188943	0.451732
20	2	Female	1879.05	Large	0.13117	0.12575	0.157029	0.303903	0.292197	0.236465	0.292407	0.483886	0.323939	0.332203	0.345767	0.390814		0.165403	0.180259	0.143038	0.202669	0.139803	0.197488	0.453988
20	3	Female	1906.06	Large	0.14526	0.120597	0.150267	0.287429	0.298645	0.24639	0.299844	0.361188	0.34951	0.330714	0.374302	0.40027		0.163513	0.166379	0.15596	0.184827	0.173088	0.20158	0.346807
20	4	Female	1855.68	Large	0.14034	0.114155	0.15009	0.294834	0.288986	0.248988	0.295738	0.435988	0.339062	0.325383	0.36017	0.370385		0.161701	0.196886	0.134668	0.195513	0.153396	0.208181	0.345694
20	5	Female	1889.02	Large	0.137263	0.122814	0.146543	0.312493	0.289549	0.249071	0.326499	0.410862	0.329016	0.355143	0.399385	0.408279		0.168917	0.189957	0.147456	0.211353	0.150241	0.207902	0.39588
20	6	Female	1869	Large	0.150995	0.116673	0.153598	0.296124	0.298384	0.244394	0.3759	0.461204	0.320225	0.327487	0.374285	0.406783		0.176881	0.202594	0.1462	0.210532	0.155959	0.200324	0.364896
21	1	Female	1799.61	Large	0.128779	0.11195	0.148481	0.26742	0.311317	0.208549	0.307229	0.447827	0.315557	0.324358	0.34484	0.348095		0.149378	0.189557	0.117466	0.161934	0.129814	0.173434	0.552906
21	2	Female	1815.94	Large	0.138029	0.130672	0.141653	0.288332	0.309101	0.209955	0.350706	0.439854	0.331812	0.354785	0.324534	0.377933		0.157387	0.181405	0.114607	0.17035	0.126591	0.179763	0.4024
21	3	Female	1830.13	Large	0.136992	0.135966	0.130017	0.284975	0.32227	0.215479	0.28754	0.475634	0.336021	0.335529	0.362717	0.392058		0.161345	0.177703	0.140025	0.173309	0.136187	0.193383	0.343896
21	4	Female	1827.93	Large	0.121427	0.129533	0.13265	0.294831	0.309117	0.211431	0.349737	0.460512	0.33708	0.346557	0.340408	0.385766		0.176214	0.172862	0.124945	0.172757	0.13588	0.201377	0.265162
21	5	Female	1818.26	Large	0.12266	0.11176	0.13325	0.297993	0.301805	0.231827	0.394523	0.506371	0.346455	0.339831	0.3428	0.420901		0.177953	0.17584	0.128884	0.182068	0.150712	0.195109	0.279637
21	6	Female	1799.28	Large	0.151168	0.127062	0.138798	0.275286	0.329336	0.204927	0.343411	0.428072	0.34474	0.326459	0.318703	0.374177		0.183362	0.181763	0.142442	0.181831	0.159849	0.193479	0.377622
22	1	Female	1570.45	Small	0.139103	0.109429	0.146569	0.258761	0.286066	0.205849	0.295156	0.411243	0.291311	0.266732	0.257605	0.328512		0.18404	0.218673	0.181565	0.185861	0.156741	0.199444	0.483394
22	2	Female	1623.69	Small	0.135221	0.119986	0.14348	0.270555	0.282205	0.215823	0.37838	0.430521	0.302421	0.316215	0.271221	0.349962		0.160457	0.197164	0.192	0.175216	0.152838	0.223098	0.506809
22	3	Female	1613.74	Small	0.135203	0.119681	0.147996	0.278597	0.303748	0.220728	0.272404	0.377614	0.294077	0.282563	0.292785	0.330767		0.178476	0.191456	0.195399	0.194688	0.152285	0.21238	0.353509
22	4	Female	1619.78	Small	0.129317	0.0975095	0.139885	0.267754	0.303514	0.237873	0.304326	0.431203	0.29795	0.302115	0.28662	0.352684		0.173526	0.21536	0.15736	0.187622	0.150106	0.198945	0.486287
22	5	Female	1611.42	Small	0.140636	0.107344	0.138041	0.279252	0.278573	0.221382	0.289866	0.365706	0.300564	0.319237	0.283847	0.365575		0.159328	0.19759	0.155115	0.165447	0.134534	0.18613	0.427132
22	6	Female	1592.69	Small	0.150063	0.123901	0.147173	0.276258	0.294268	0.224721	0.254499	0.400873	0.291119	0.276389	0.318218	0.369444		0.195102	0.202981	0.181034	0.201481	0.162071	0.216574	0.447619
23	1	Female	1587.82	Small	0.129346	0.102101	0.143181	0.263081	0.266831	0.207304	0.26959	0.372272	0.276491	0.254439	0.284419	0.323395		0.172918	0.196875	0.158769	0.188557	0.145703	0.198921	0.373044
23	2	Female	1631.58	Small	0.121473	0.0941858	0.134063	0.274921	0.301176	0.217147	0.262316	0.353538	0.300611	0.325054	0.344022	0.356888		0.158534	0.217426	0.182374	0.206931	0.135642	0.204042	0.474291
23	3	Female	1631.64	Small	0.133546	0.101935	0.140551	0.261916	0.30203	0.197114	0.224585	0.418325	0.291421	0.292316	0.295395	0.314721		0.152492	0.188082	0.13317	0.168915	0.117433	0.199154	0.47133
23	4	Female	1625.23	Small	0.133781	0.0978422	0.134612	0.285747	0.299086	0.220851	0.291414	0.418584	0.301003	0.288733	0.313929	0.357762		0.158384	0.192492	0.148849	0.178601	0.12129	0.206685	0.352498
23	5	Female	1631.19	Small	0.114835	0.0961886	0.133092	0.26515	0.302616	0.223114	0.245089	0.403954	0.330743	0.324254	0.288125	0.390688		0.165552	0.201541	0.173342	0.185514	0.132268	0.209657	0.48838
23	6	Female	1594.42	Small	0.112978	0.111453	0.132302	0.274979	0.296689	0.220635	0.319977	0.405348	0.293425	0.320279	0.273266	0.362496		0.165866	0.201185	0.16366	0.176926	0.139063	0.230781	0.519884
24	1	Female	1883.57	Large	0.133884	0.136832	0.147285	0.279289	0.30907	0.21477	0.254974	0.4343	0.313305	0.295842	0.286938	0.376137		0.137459	0.166426	0.140524	0.174846	0.124326	0.192775	0.205148
24	2	Female	1900.82	Large	0.143235	0.13226	0.138963	0.308004	0.313876	0.230594	0.29613	0.472189	0.335315	0.315895	0.315362	0.32269		0.135006	0.159295	0.149527	0.177654	0.117502	0.202592	0.344031
24	3	Female	1924.31	Large	0.127886	0.141759	0.128492	0.301167	0.304698	0.226913	0.276377	0.420786	0.318632	0.312061	0.333617	0.363541		0.168241	0.191888	0.173572	0.196714	0.127743	0.213764	0.219837
24	4	Female	1910.97	Large	0.141273	0.123106	0.14677	0.316953	0.311961	0.23288	0.300393	0.455144	0.316545	0.330466	0.303027	0.349625		0.124573	0.168934	0.13066	0.180604	0.119129	0.192777	0.29428
24	5	Female	1910.01	Large	0.13811	0.134701	0.130326	0.324721	0.319985	0.244552	0.273425	0.397127	0.319516	0.338027	0.335093	0.371015		0.118204	0.166159	0.1739	0.183841	0.126257	0.208181	0.282632
24	6	Female	1895.77	Large	0.130585	0.138587	0.142885	0.303566	0.312053	0.241884	0.291479	0.440984	0.311905	0.327783	0.316459	0.357943		0.148302	0.17014	0.192716	0.189136	0.131851	0.193355	0.320726
25	1	Female	1812.85	Large	0.157425	0.134578	0.176991	0.311481	0.300554	0.25834	0.223632	0.403677	0.324216	0.335636	0.264377	0.347688		0.174542	0.196496	0.131959	0.1991	0.126272	0.186792	0.41148
25	2	Female	1845.22	Large	0.157956	0.141394	0.161448	0.301485	0.28335	0.253307	0.349714	0.507478	0.341606	0.321736	0.285206	0.34524		0.14783	0.21445	0.146325	0.180249	0.143814	0.185932	0.526746
25	3	Female	1862.74	Large	0.16077	0.117453	0.15201	0.310191	0.310962	0.250033	0.264377	0.455167	0.336578	0.32512	0.349332	0.384651		0.161384	0.223585	0.13493	0.179695	0.133454	0.172811	0.571926
25	4	Female	1849.88	Large	0.139116	0.10843	0.145374	0.309236	0.306048	0.279353	0.296901	0.456797	0.332129	0.33269	0.314733	0.371141		0.136939	0.218915	0.14655	0.194225	0.124159	0.176011	0.468769
25	5	Female	1846.94	Large	0.161272	0.112147	0.156567	0.324018	0.279916	0.258082	0.312193	0.472968	0.333567	0.342847	0.303971	0.38987		0.13038	0.222776	0.126437	0.200957	0.125128	0.183656	0.377045
25	6	Female	1828.39	Large	0.156062	0.122644	0.166351	0.294779	0.296218	0.255385	0.350663	0.500628	0.32711	0.322446	0.329317	0.391417		0.15543	0.20104	0.132951	0.183504	0.119418	0.176076	0.51484
