# Supplementary material for: Uncovering a ‘sensitive window’ of multisensory and motor neuroplasticity in the cerebrum and cerebellum of male and female starlings
Source: eLife. 2021 Jun 7;10:e66777. doi: 10.7554/eLife.66777 (PMC8219385; doi:10.7554/eLife.66777)
Supplement: Figure 6—source data 1. [file elife-66777-fig6-data1.xlsx]

## Sheet: Sourcedata figure 6
subject_nr	time	sex	Brainsize	L/S	fd_WB_L>S_LPS_R	fd_WB_L>S_TrO_L	fd_WB_L>S_TrO_R	fd_WB_L>S_cerebellum		fd_WB_S>L_AreaX_rost_L	fd_WB_S>L_LaM_R	fd_WB_S>L_NCM_R	fd_WB_S>L_NCM_R2		logfc_WB_L>S_HVC_L	logfc_WB_L>S_HVC_R	logfc_WB_L>S_hippocampus	logfc_WB_L>S_NCM_L	logfc_WB_L>S_AreaX_L	logfc_WB_L>S_AreaX_R	logfc_WB_L>S_TFM_L	logfc_WB_L>S_TFM_R	logfc_WB_L>S_LSt_L	logfc_WB_L>S_LPS_R	logfc_WB_L>S_HA_R	logfc_WB_L>S_cerebellum		logfc_WB_S>L_TrO_L
1	1	Male	1904.7	Large	0.47137	0.49514	0.50456	0.59936		0.29305	0.27725	0.25325	0.23031		0.31637	0.19195	0.026622	0.090864	-0.04878	-0.025232	0.0058576	0.018721	0.15987	0.1659	0.26812	0.034527		0.11357
1	2	Male	1899.3	Large	0.46926	0.40622	0.44542	0.46796		0.25701	0.35714	0.26571	0.36127		0.23704	0.16421	0.067224	0.078976	0.032532	0.044443	0.0020293	-0.0076021	0.15065	0.068366	0.20994	0.039914		0.17555
1	3	Male	1900.2	Large	0.46916	0.56241	0.50349	0.48859		0.3419	0.35463	0.3019	0.36354		0.19881	0.11596	0.19726	0.090892	-0.052395	0.00011023	-0.046528	0.014532	0.1061	0.084463	0.24104	0.028034		0.18008
1	4	Male	1899	Large	0.45685	0.54338	0.44168	0.49339		0.29237	0.33137	0.27032	0.38035		0.17074	0.10029	0.27416	0.11583	0.077908	-0.028378	-0.0033752	0.0022675	0.15744	0.12366	0.21259	0.041781		0.1206
1	5	Male	1896.7	Large	0.46249	0.4128	0.49371	0.42123		0.28833	0.31603	0.292	0.3243		0.13834	0.141	0.036035	0.10783	0.030163	0.11674	0.0061408	0.021206	0.21286	0.077801	0.26411	0.0018514		0.084768
1	6	Male	1904.7	Large	0.32091	0.5871	0.46295	0.47762		0.25649	0.35537	0.28222	0.29457		0.034622	0.11816	0.19535	0.094036	0.039965	0.036578	0.018942	-0.0010795	0.18195	0.088448	0.2211	-0.012019		0.045083
2	1	Male	1794.5	Small	0.45315	0.50377	0.48017	0.438		0.31478	0.32316	0.33724	0.35364		-0.20039	-0.0088508	0.073687	-0.002027	-0.26921	-0.11376	-0.047669	-0.030243	-0.1365	0.043235	0.054931	0.033771		0.2951
2	2	Male	1776.3	Small	0.43109	0.47372	0.49964	0.42661		0.37667	0.36737	0.30203	0.35479		-0.067848	0.03786	-0.028527	-0.027832	-0.1055	0.053496	-0.014529	-0.033582	-0.019199	-0.07379	0.090065	-0.034735		0.26778
2	3	Male	1777.5	Small	0.46996	0.55322	0.46372	0.44015		0.37945	0.35016	0.33917	0.38228		0.053416	0.051147	0.21429	0.0071607	-0.21926	-0.11631	-0.035581	-0.031083	-0.094999	-0.024397	0.070985	0.0064877		0.33947
2	4	Male	1772.9	Small	0.4171	0.512	0.45076	0.41174		0.29742	0.38277	0.35738	0.46003		-0.068626	-0.014647	0.21226	-0.0071961	-0.19484	-0.11596	-0.031509	-0.029617	-0.071523	-0.1086	0.040859	0.030747		0.31681
2	5	Male	1755.2	Small	0.40472	0.51779	0.31126	0.39949		0.34146	0.34997	0.27979	0.36683		-0.038941	0.087252	0.065027	0.0266	-0.17112	-0.063938	-0.029493	-0.0086585	-0.11771	0.059057	0.069118	-0.026719		0.36804
2	6	Male	1794.5	Small	0.5002	0.37469	0.39332	0.39472		0.40305	0.3723	0.32873	0.41011		-0.088583	0.034711	-0.049114	0.019362	-0.17717	-0.12296	-0.028342	-0.033211	-0.089144	0.051981	0.072399	-0.0043863		0.38429
3	1	Male	1777.3	Small	0.44359	0.46197	0.39563	0.41495		0.4233	0.38242	0.3339	0.35354		0.071041	0.076552	-0.032648	-0.020607	-0.11967	-0.1259	-0.046376	-0.033987	-0.044708	-0.02376	0.10102	-0.066599		0.3068
3	2	Male	1773.3	Small	0.50289	0.42403	0.42301	0.42315		0.29246	0.36368	0.34568	0.39072		0.10063	0.049292	0.090373	-0.0029513	-0.053078	-0.15538	-0.034563	-0.022491	-0.065675	0.12302	0.094937	-0.062406		0.22182
3	3	Male	1775.2	Small	0.3823	0.39933	0.43415	0.43532		0.35029	0.34995	0.30743	0.35337		0.11647	0.010482	0.2017	0.032274	-0.016845	-0.046117	-0.027582	-0.021475	-0.057702	0.0196	0.10372	-0.10672		0.25433
3	4	Male	1772.3	Small	0.35409	0.43771	0.40899	0.39948		0.30611	0.38958	0.34826	0.39159		-0.002012	0.040136	0.18303	0.0059431	-0.019336	-0.14163	-0.047296	-0.018276	-0.030116	-0.024318	0.097282	-0.10145		0.24022
3	5	Male	1770.6	Small	0.48583	0.3893	0.46209	0.3732		0.34495	0.38436	0.32451	0.41108		0.0018119	0.035898	0.062485	0.021409	-0.056636	0.012295	0.00012583	0.022325	-0.057595	0.028527	0.14432	-0.10442		0.23024
3	6	Male	1777.3	Small	0.35438	0.49144	0.40771	0.41054		0.3205	0.33725	0.25139	0.40553		0.11868	0.034975	0.17852	0.044845	-0.027823	-0.0056161	-0.039067	-0.041703	-0.035593	0.016423	0.084368	-0.07659		0.19733
4	1	Male	1812	Small	0.43022	0.46845	0.42702	0.50166		0.36906	0.34973	0.35055	0.34819		-0.023413	0.055845	-0.0012495	0.0064043	-0.072365	0.060156	-0.020204	0.0089022	0.049467	0.031051	0.071204	-0.0042364		0.26506
4	2	Male	1802.2	Small	0.4271	0.47316	0.44224	0.45391		0.35149	0.32574	0.32582	0.33065		0.033195	0.057341	-0.0061919	0.013811	-0.10418	-0.13018	-0.02663	-0.032879	-0.020724	-0.027054	0.10036	-0.024446		0.26793
4	3	Male	1801.7	Small	0.44859	0.52529	0.43813	0.47084		0.25199	0.36728	0.31529	0.3703		0.036893	0.04454	0.15563	0.0034622	-0.093589	-0.10762	-0.043081	-0.031009	0.046398	-0.06286	0.10725	0.012293		0.3749
4	4	Male	1801.4	Small	0.42643	0.42712	0.3937	0.4366		0.37414	0.32812	0.34103	0.37063		-0.098064	-0.0094503	0.16187	0.004599	-0.09114	-0.046457	-0.022661	-0.038339	0.056976	-0.044285	0.093692	0.04121		0.33893
4	5	Male	1800.3	Small	0.44381	0.42547	0.46822	0.45443		0.27281	0.33089	0.32688	0.39374		0.021175	0.083962	0.10918	0.025891	-0.03705	-0.078051	-0.034917	-0.022528	0.021518	-0.038033	0.071989	0.020749		0.27135
4	6	Male	1812	Small	0.47107	0.4991	0.40583	0.46373		0.35878	0.35059	0.34701	0.43072		0.021327	0.019661	0.11644	0.00011089	-0.13009	-0.092935	-0.041295	-0.072912	0.085219	-0.045644	0.063606	0.02346		0.28762
5	1	Male	1929.32	Large	0.53578	0.44263	0.46724	0.40201		0.36515	0.37631	0.34673	0.34402		0.21859	0.18079	0.091981	0.042547	-0.10771	-0.026143	0.032703	0.013568	0.10592	0.031014	0.11157	-0.034644		0.37526
5	2	Male	1909.34	Large	0.46066	0.4742	0.49889	0.32813		0.181	0.3286	0.34335	0.35506		0.11477	0.033555	0.1363	0.092617	0.032453	-0.0014072	0.030787	0.0030961	0.15649	0.091145	0.089219	-0.05665		0.39179
6	1	Male	1807.6	Small	0.48124	0.52217	0.48229	0.4451		0.33349	0.33751	0.32128	0.3177		0.009079	-0.018149	-0.077473	-0.02288	-0.19971	-0.15112	-0.046838	-0.055725	-0.062927	0.069599	0.0813	-0.069234		0.30807
6	2	Male	1803.9	Small	0.46101	0.46241	0.47822	0.48704		0.36373	0.37484	0.24029	0.33039		0.10911	0.068051	-0.02348	0.012804	-0.19281	-0.19112	-0.040811	-0.088774	-0.07518	0.14611	0.13636	-0.016638		0.37566
6	3	Male	1803.4	Small	0.40651	0.4795	0.38775	0.40631		0.39798	0.31349	0.31384	0.41499		0.0012421	-0.012792	0.097228	0.023703	-0.18477	-0.17562	-0.086426	-0.086322	-0.020915	0.28217	0.13261	-0.066526		0.37759
6	4	Male	1803.7	Small	0.43111	0.43443	0.51509	0.45202		0.37522	0.35411	0.3618	0.33588		-0.055019	-0.049524	0.17145	0.00089707	-0.046255	-0.10959	-0.058651	-0.060355	-0.020496	-0.013719	0.09315	-0.019147		0.30341
6	5	Male	1800.2	Small	0.36308	0.43042	0.38983	0.43145		0.35438	0.28685	0.30116	0.41591		-0.074065	0.033969	0.16665	0.0085998	-0.012429	0.021317	-0.058433	-0.019005	0.016153	0.097068	0.121	-0.0068484		0.29163
6	6	Male	1807.6	Small	0.4137	0.45789	0.4243	0.41764		0.38485	0.36396	0.34808	0.4182		-0.24049	-0.13652	0.10511	-0.018183	-0.099717	-0.10267	-0.091759	-0.091418	-0.086112	-0.045217	0.10509	0.060541		0.30432
7	1	Male	1861.8	Large	0.4338	0.49418	0.4254	0.44447		0.33709	0.32992	0.25376	0.34001		0.21096	0.08673	-0.025834	-0.0034503	-0.022709	0.046974	-0.0072188	-0.021559	0.048695	-0.056706	0.2031	-0.078835		0.2026
7	2	Male	1860.8	Large	0.44941	0.51251	0.49092	0.42917		0.28813	0.34079	0.31938	0.26532		0.19474	0.15427	-0.037943	0.032728	-0.068993	0.044374	-0.020459	0.007569	0.079513	-0.021726	0.18457	-0.099682		0.14289
7	3	Male	1859.2	Large	0.37829	0.51549	0.47334	0.39259		0.30403	0.34452	0.33108	0.39256		0.10442	0.012824	0.18371	0.0055276	0.046532	0.021396	-0.0032081	-0.028366	0.14454	-0.047937	0.19013	-0.078699		0.17363
7	5	Male	1855.8	Large	0.36596	0.50432	0.5088	0.41779		0.28818	0.35951	0.3588	0.35123		0.049146	0.036936	-0.0083998	-0.0024005	0.099299	0.1947	0.012516	0.010379	0.046374	-0.012987	0.20704	-0.09035		0.068646
7	6	Male	1861.8	Large	0.37903	0.50157	0.45979	0.47335		0.27046	0.32086	0.31425	0.38		0.062562	0.054263	0.13713	0.019772	0.032985	0.078491	-0.032017	-0.019934	0.093675	-0.062316	0.19072	-0.095943		0.25078
8	1	Male	1739.3	Small	0.41802	0.39935	0.4057	0.34425		0.29992	0.36797	0.29624	0.32942		0.068869	0.053613	0.033054	-0.067058	-0.24899	-0.22113	-0.070194	-0.049289	-0.077978	-0.11815	0.15242	-0.065885		0.41031
8	2	Male	1725.4	Small	0.43526	0.43799	0.39454	0.41717		0.28179	0.36347	0.34689	0.3821		0.086871	0.05672	-0.045423	-0.033214	-0.25684	-0.22139	-0.078203	-0.058002	-0.10826	-0.17941	0.13187	-0.07579		0.41348
8	3	Male	1724.9	Small	0.43425	0.40249	0.50239	0.43788		0.33932	0.35429	0.3105	0.38197		0.13731	0.062899	0.069689	-0.058046	-0.20636	-0.28839	-0.063926	-0.063311	-0.084668	-0.14658	0.11714	-0.11103		0.3961
8	4	Male	1726.9	Small	0.47284	0.42846	0.40432	0.36984		0.3539	0.40938	0.3198	0.34974		-0.03559	0.0033337	0.048362	0.0090392	-0.14962	-0.29264	-0.084857	-0.063293	-0.020737	-0.16729	0.11956	-0.10768		0.4162
8	5	Male	1718.7	Small	0.45461	0.46935	0.37219	0.45373		0.39812	0.39568	0.27455	0.37421		-0.025943	0.059978	-0.022058	0.00585	-0.15976	-0.10804	-0.029024	-0.011916	-0.037157	-0.12802	0.09072	-0.086035		0.28778
8	6	Male	1739.3	Small	0.39885	0.50637	0.33313	0.36132		0.33477	0.32044	0.33434	0.33864		-0.13452	-0.04485	0.023481	-0.025482	-0.1352	-0.171	-0.098744	-0.068336	-0.099788	-0.15148	0.097029	-0.048926		0.37307
9	1	Male	1813.5	Large	0.44424	0.49856	0.45961	0.47984		0.26128	0.32215	0.2442	0.33884		0.23265	0.11925	0.070972	0.064747	-0.073591	-0.08133	0.0050346	0.02577	0.038224	0.29248	0.23454	-0.040272		0.12633
9	2	Male	1809.8	Large	0.49111	0.51629	0.51056	0.54772		0.3114	0.33849	0.254	0.32923		0.2187	0.12847	0.060652	0.069288	-0.035681	-0.14539	-0.010656	-0.01175	0.0061375	0.16966	0.22284	-0.012038		0.19071
9	3	Male	1808.2	Large	0.54929	0.51921	0.52487	0.48755		0.26615	0.28511	0.29739	0.34803		0.22639	0.076818	0.19107	0.038639	-0.05416	-0.21584	-0.0014145	-0.0034764	-0.010407	0.20436	0.18108	-0.041515		0.17646
9	4	Male	1811.2	Large	0.38878	0.49293	0.48633	0.46935		0.28653	0.35371	0.36174	0.36309		0.0054972	-0.016868	0.14643	0.0684	0.027428	-0.099664	-0.0059299	0.0018711	-0.032164	0.11572	0.16347	-0.032106		0.073959
9	5	Male	1807.1	Large	0.5043	0.53453	0.46165	0.48386		0.32388	0.29681	0.28128	0.29018		0.22117	0.079195	0.14829	0.05015	0.031104	-0.05982	0.031118	0.065294	-0.014686	0.28726	0.19354	-0.059587		0.045306
9	6	Male	1813.5	Large	0.40057	0.60561	0.54545	0.46734		0.36394	0.3583	0.29174	0.36783		0.077777	0.036836	0.17968	0.056016	0.056775	0.004712	0.028312	-0.014125	0.0087028	0.096455	0.20516	-0.064898		0.13546
10	1	Male	1973.1	Large	0.50043	0.52714	0.44278	0.51114		0.33275	0.3207	0.24696	0.30698		0.29421	0.19697	0.098368	0.14957	-0.071344	0.0027605	-0.0033751	0.024673	0.09398	0.10195	0.21226	0.049316		0.094844
10	2	Male	1953.5	Large	0.48283	0.57472	0.52278	0.37584		0.27222	0.35638	0.31224	0.36345		0.12624	0.17121	0.2301	0.13699	-0.050948	-0.10299	-0.045469	-0.039623	0.14394	0.0064173	0.23563	0.033111		0.22903
10	3	Male	1953.4	Large	0.50518	0.60457	0.4746	0.44954		0.33258	0.33289	0.27727	0.39668		0.23714	0.19185	0.23536	0.11849	-0.022288	-0.050244	-0.0079333	-0.0047336	0.087747	0.089213	0.23431	0.020775		0.1885
10	4	Male	1948.4	Large	0.41119	0.49981	0.55552	0.47476		0.28611	0.34069	0.2998	0.30087		0.22283	0.17422	0.28437	0.16126	0.041325	0.025201	0.011612	-0.014966	0.11734	0.0909	0.21708	0.0095015		0.043958
10	5	Male	1945.1	Large	0.44839	0.48407	0.50163	0.40206		0.32916	0.34033	0.27581	0.36171		0.024754	0.13013	0.13072	0.15972	0.070371	0.054464	0.028943	0.0045377	0.168	0.13868	0.33229	0.031217		0.10502
10	6	Male	1973.1	Large	0.48108	0.56831	0.51113	0.40957		0.3891	0.31064	0.2797	0.28898		0.081803	0.14359	0.21538	0.12004	0.039315	0.089014	-0.0054385	-0.033141	0.15552	0.027593	0.22683	-0.00044519		0.14975
11	1	Male	1862.5	Large	0.41087	0.4497	0.40958	0.45841		0.31107	0.34485	0.36049	0.37254		0.24424	0.1636	0.14361	0.084477	-0.075132	-0.08323	0.062042	0.050036	-0.014518	0.09706	0.19671	0.12529		0.33337
11	2	Male	1851.5	Large	0.46635	0.49096	0.48794	0.46719		0.30879	0.25808	0.2951	0.31017		0.24815	0.10273	0.14602	0.060264	-0.023626	-0.072508	0.039371	0.028917	0.0037888	0.10939	0.20604	0.041794		0.3652
11	3	Male	1851.5	Large	0.42336	0.41628	0.44489	0.5467		0.31826	0.3113	0.25491	0.32524		0.22064	0.14332	0.13457	0.049264	-0.086983	-0.099429	0.078937	0.044436	-0.02229	0.18933	0.16685	0.062188		0.40478
11	4	Male	1846.5	Large	0.4106	0.55015	0.38529	0.48168		0.31708	0.30344	0.32378	0.39112		0.080478	0.060796	0.16938	0.096714	-0.11023	-0.082093	0.028731	0.04686	0.023121	0.11896	0.16073	0.088476		0.34405
11	5	Male	1847.8	Large	0.4797	0.47507	0.37182	0.41632		0.28752	0.34222	0.34772	0.39832		-0.0098547	0.077592	0.069135	0.069006	-0.019013	0.064869	0.058206	0.073166	0.0069153	0.034859	0.11732	0.083118		0.29727
11	6	Male	1862.5	Large	0.52593	0.48612	0.46567	0.49636		0.31643	0.30368	0.29411	0.37656		0.05781	0.036654	0.088346	0.076294	0.010448	0.035741	0.043342	0.030968	-0.0018077	0.078935	0.146	0.070571		0.37589
12	1	Male	1758	Small	0.39832	0.48222	0.4369	0.42057		0.42347	0.36222	0.28992	0.33873		0.033193	0.088809	-0.19789	-0.022523	-0.059404	-0.21764	0.020158	-0.037246	0.035768	-0.011662	0.071883	-0.0010424		0.37192
12	2	Male	1740.5	Small	0.41307	0.50535	0.49534	0.38687		0.3355	0.37246	0.32979	0.39522		-0.016828	0.039206	-0.056565	-0.04651	-0.17222	-0.29492	-0.002621	-0.054914	-0.066257	-0.13037	0.082918	0.036579		0.38699
12	3	Male	1742.4	Small	0.36339	0.48833	0.33379	0.33197		0.3671	0.37061	0.41322	0.41861		0.047548	0.0042992	-0.052667	-0.093771	-0.27493	-0.29142	-0.042293	-0.056107	-0.013733	-0.12585	0.073374	0.024875		0.40706
12	4	Male	1743	Small	0.34485	0.43619	0.39367	0.38492		0.30965	0.36209	0.28887	0.34842		0.0084144	0.035274	0.066868	0.0034502	-0.053438	-0.11121	0.012203	-0.012501	-0.0005626	-0.079552	0.052543	0.037478		0.44607
12	5	Male	1741.7	Small	0.40323	0.35013	0.38734	0.43074		0.32919	0.36511	0.2593	0.29956		0.053371	0.054217	-0.11666	-0.014752	-0.12201	-0.24242	0.026386	-0.0090932	-0.045535	-0.054446	0.07379	-0.032117		0.3628
12	6	Male	1758	Small	0.40264	0.48789	0.41568	0.35894		0.35231	0.33207	0.34186	0.42332		-0.061689	-0.003921	0.091145	-0.05013	-0.075328	-0.10764	-0.060078	-0.071561	0.027116	-0.14609	0.018642	-0.033497		0.34839
13	1	Male	1744.5	Small	0.45727	0.44835	0.40702	0.41556		0.25363	0.39273	0.34461	0.41963		0.0539	0.015395	-0.098599	-0.053741	-0.12094	-0.080317	-0.054856	-0.020005	-0.075492	0.097367	0.017577	0.0024974		0.25695
13	2	Male	1731.3	Small	0.42247	0.42912	0.40109	0.4108		0.30055	0.36684	0.36315	0.40433		0.15113	-0.010875	0.083836	-0.025978	-0.053748	-0.17909	-0.034733	-0.074198	-0.1184	-0.021875	0.010213	0.027058		0.30783
13	3	Male	1734	Small	0.4631	0.40998	0.43185	0.37946		0.35659	0.35371	0.37303	0.32606		-0.039938	-0.079741	0.096431	-0.036911	-0.10721	-0.15783	-0.080924	-0.049265	-0.13938	0.057466	0.022187	0.03268		0.32587
13	4	Male	1734.2	Small	0.46309	0.27875	0.39431	0.39626		0.30091	0.35479	0.34437	0.40341		-0.16508	-0.07336	0.046782	-0.055198	0.043689	0.084754	-0.047003	-0.032408	-0.16461	0.031838	0.035091	0.048655		0.31852
13	5	Male	1731.3	Small	0.43439	0.4208	0.39945	0.38454		0.37144	0.3012	0.34202	0.36477		-0.12804	-0.068562	-0.023626	-0.014392	-0.072379	0.081742	-0.02207	-0.00068271	-0.16583	0.065908	0.092587	0.053155		0.22156
13	6	Male	1744.5	Small	0.42605	0.54269	0.43274	0.43018		0.29332	0.34404	0.33912	0.35735		0.094779	0.043153	0.078751	-0.057403	-0.083664	-0.097122	-0.048332	-0.061858	-0.10274	-0.07837	0.016286	0.0010438		0.28907
14	1	Female	1889.06	Large	0.43334	0.55151	0.54193	0.50181		0.32802	0.32589	0.22707	0.31161		0.11851	0.12825	0.26417	0.11775	0.095356	0.12994	0.074293	0.082176	0.068361	0.14189	0.14068	0.10937		0.17091
14	2	Female	1911.4	Large	0.40011	0.52898	0.4823	0.50597		0.35327	0.32694	0.26181	0.38998		0.16801	0.14131	0.15847	0.13705	0.037336	0.046111	0.073973	0.07303	0.075184	0.058151	0.121	0.11087		0.19176
14	3	Female	1893.85	Large	0.54379	0.48768	0.46183	0.463		0.23828	0.32524	0.28704	0.3789		-0.04021	0.11012	0.20773	0.12572	0.063248	0.068857	0.0586	0.055223	0.078116	0.11387	0.1223	0.088989		0.11011
14	4	Female	1915.88	Large	0.4915	0.63453	0.41255	0.55459		0.32969	0.27124	0.25049	0.31353		0.095508	0.17807	0.37626	0.16212	0.076004	0.02401	0.0532	0.068035	0.0047948	0.19301	0.13154	0.11502		-0.2997
14	5	Female	1913.93	Large	0.51608	0.69924	0.46984	0.55536		0.28261	0.28787	0.22932	0.30741		0.12331	0.22112	0.29257	0.16762	0.11617	0.084937	0.089924	0.091638	0.021558	0.081665	0.14733	0.098334		-0.28502
14	6	Female	1905.85	Large	0.47473	0.52984	0.58147	0.52441		0.31255	0.30509	0.24475	0.3455		-0.064874	0.1269	0.08859	0.14429	0.10503	0.24012	0.064948	0.066954	0.041117	0.11376	0.074044	0.088418		0.12106
15	1	Female	1716.04	Small	0.45343	0.34361	0.46949	0.4712		0.35105	0.31779	0.31114	0.34221		-0.016188	-0.022334	-0.031401	-0.027819	0.034061	-0.025496	0.028638	0.0059892	-0.051886	-0.094368	0.10092	-0.036638		0.31109
15	2	Female	1731.33	Small	0.46474	0.47209	0.41926	0.46567		0.37592	0.33406	0.29282	0.38373		0.063612	-0.044428	-0.029522	-0.060555	-0.054166	-0.17994	-0.0026104	-0.03534	-0.11068	-0.10075	0.03654	0.012444		0.33655
15	3	Female	1712.76	Small	0.45179	0.3945	0.41228	0.44122		0.29406	0.36411	0.29003	0.32156		-0.020229	-0.061416	-0.11193	-0.068124	-0.062221	-0.21686	-0.030512	-0.050412	-0.083749	-0.094666	0.065638	-0.037426		0.3418
15	4	Female	1694.36	Small	0.50574	0.48293	0.4484	0.47418		0.29236	0.32914	0.31457	0.34983		0.0037389	-0.0453	0.054007	-0.029629	0.045528	-0.032919	0.014329	-0.0098432	-0.085146	-0.029697	0.064665	0.018303		0.23322
15	5	Female	1694.15	Small	0.48854	0.4593	0.40532	0.3905		0.31731	0.40236	0.32141	0.2923		-0.066992	-0.09532	-0.0048788	-0.047351	0.011218	-0.18515	-0.023098	-0.069148	-0.093859	0.08929	0.10428	-0.013908		0.25704
15	6	Female	1682.18	Small	0.36141	0.48055	0.42946	0.41936		0.35319	0.31529	0.29177	0.38868		0.010141	-0.034236	-0.0030166	-0.037905	-0.0087451	-0.0039189	0.010301	-0.026284	-0.079535	-0.084703	0.042571	-0.015352		0.30137
16	1	Female	1735.5	Small	0.40623	0.47353	0.38367	0.4047		0.34289	0.33046	0.38502	0.39181		-0.038526	-0.04057	-0.046182	-0.02079	-0.010807	0.024676	-0.060594	-0.036631	-0.040894	0.041706	0.12813	-0.084659		0.30734
16	2	Female	1734.15	Small	0.43563	0.37897	0.3756	0.40029		0.34718	0.35467	0.34143	0.30498		-0.019643	-0.056718	0.13808	-0.028912	-0.12726	-0.033011	-0.065901	-0.05375	0.062602	0.031046	0.080408	-0.090839		0.33898
16	3	Female	1743.03	Small	0.48462	0.5089	0.34297	0.42271		0.40405	0.33495	0.35558	0.41202		-0.030258	-0.01579	0.12362	0.0051791	-0.038629	-0.027939	-0.021131	-0.038173	0.002551	0.067717	0.090241	-0.061694		0.33583
16	4	Female	1739.23	Small	0.41817	0.4903	0.39956	0.43618		0.276	0.37542	0.33366	0.39299		-0.10873	-0.053278	0.15545	-0.013427	-0.11717	-0.16941	-0.041101	-0.027833	-0.019073	0.14074	0.065819	-0.095302		0.19259
16	5	Female	1720.53	Small	0.56174	0.35936	0.43191	0.35081		0.35315	0.33842	0.39124	0.38203		-0.078464	-0.07889	0.19906	-0.0087525	-0.16713	-0.17891	-0.035144	-0.04316	0.0021453	0.12876	0.029852	-0.031035		0.36708
16	6	Female	1749.24	Small	0.27496	0.46312	0.44279	0.40077		0.34294	0.34364	0.34939	0.40757		-0.022906	-0.044543	0.062255	-0.01962	-0.058959	-0.059764	-0.039921	-0.025082	-0.02374	-0.017699	0.074095	-0.11231		0.27799
17	1	Female	1763.32	Small	0.45933	0.41524	0.35375	0.44078		0.28702	0.37357	0.28508	0.34493		-0.088123	0.024202	0.007109	0.00019315	0.12207	0.17266	0.037603	-0.022088	0.1619	-0.089224	0.12324	0.034973		0.30206
17	2	Female	1803.66	Small	0.41679	0.4256	0.36769	0.51136		0.2097	0.37416	0.30774	0.40902		0.06099	0.013588	-0.029946	-0.028513	0.0039946	0.021634	0.0034842	-0.03492	0.098957	-0.0068895	0.20563	-0.040725		0.24796
17	3	Female	1820.24	Small	0.42307	0.46222	0.37163	0.44851		0.26223	0.3648	0.25834	0.44201		-0.010402	0.034696	0.075633	0.039031	0.055754	0.095127	-0.0018198	-0.014958	0.1266	0.0049389	0.091971	0.046985		0.16966
17	4	Female	1795.84	Small	0.42614	0.23575	0.24978	0.53009		0.27804	0.34323	0.30777	0.40242		-0.0067056	0.030934	0.1358	-0.0040827	0.12174	0.11211	0.036262	-0.023817	0.14968	-0.07562	0.15578	0.040915		0.17921
17	6	Female	1788.42	Small	0.43816	0.40666	0.34604	0.46416		0.29122	0.35543	0.29685	0.32086		-0.0067158	0.031616	0.047487	-0.025461	0.0070873	0.053512	-0.02208	-0.032064	0.096093	-0.013555	0.18158	0.012772		0.20954
18	1	Female	1590.88	Small	0.41114	0.3985	0.40217	0.52015		0.30826	0.3415	0.28985	0.39843		-0.021467	-0.0013241	0.035203	-0.073607	-0.18319	-0.1264	-0.060498	-0.10569	-0.058104	-0.08343	0.11875	-0.16683		0.38978
18	2	Female	1602.99	Small	0.35689	0.43191	0.41454	0.51111		0.34137	0.32527	0.34737	0.42267		-0.12432	-0.047982	0.060566	-0.055434	-0.096662	-0.078599	-0.084931	-0.082716	-0.016053	-0.11013	0.1253	-0.14239		0.41934
18	3	Female	1597.51	Small	0.3851	0.35827	0.41935	0.37048		0.29872	0.32779	0.2734	0.34911		-0.099465	-0.076702	-0.084593	-0.07409	-0.21137	-0.11155	-0.1009	-0.13077	-0.058744	-0.0092523	0.092177	-0.13348		0.49914
18	4	Female	1591.26	Small	0.40263	0.3748	0.39386	0.39639		0.3324	0.33811	0.28412	0.34708		-0.1393	-0.076469	0.052974	-0.014972	-0.072289	0.039422	-0.080833	-0.098538	-0.081447	-0.071225	0.097884	-0.11741		0.31502
18	5	Female	1603.09	Small	0.49615	0.44482	0.34973	0.42211		0.29457	0.31978	0.24411	0.36447		-0.036131	-0.0599	0.13036	-0.037988	-0.14074	-0.20826	-0.080383	-0.13882	-0.044878	-0.133	0.12681	-0.10554		0.21586
18	6	Female	1585.02	Small	0.26077	0.38306	0.27128	0.3902		0.5272	0.372	0.28525	0.33203		-0.20246	-0.13197	0.032243	-0.048871	-0.17609	-0.20892	-0.12581	-0.13984	-0.037232	-0.047324	0.09729	-0.11061		0.36265
19	1	Female	1829.28	Large	0.50264	0.56341	0.57725	0.4407		0.2571	0.3076	0.22422	0.29566		0.047265	0.15201	0.099413	0.10679	0.148	0.19186	0.016314	0.019384	0.11947	0.10554	0.18283	-0.00056446		0.12722
19	2	Female	1849.5	Large	0.52006	0.52474	0.36789	0.48591		0.26704	0.36941	0.25326	0.34929		0.087696	0.15727	0.18883	0.091469	0.085462	0.099	0.02885	0.027889	0.11134	0.072177	0.17152	-0.0061899		0.0089726
19	3	Female	1849.01	Large	0.52305	0.49546	0.43999	0.4739		0.33352	0.30513	0.23336	0.33259		0.024789	0.13562	0.25056	0.073649	0.14146	0.099426	0.033954	0.048723	0.095077	0.12489	0.15695	0.036485		-0.28987
19	4	Female	1848.94	Large	0.48237	0.57149	0.53935	0.55345		0.33146	0.36064	0.26848	0.33734		0.063684	0.15806	0.15766	0.091071	0.073334	0.094253	0.084753	0.017424	0.1054	0.078661	0.17686	0.018214		0.13673
19	5	Female	1849.15	Large	0.48246	0.54836	0.44271	0.40085		0.30092	0.34518	0.22337	0.3202		0.097066	0.18624	0.15664	0.11474	0.12161	0.14736	0.090646	0.058309	0.053085	0.11542	0.15529	0.019154		0.1061
19	6	Female	1835.9	Large	0.51643	0.47783	0.54561	0.43422		0.24249	0.3325	0.21929	0.38423		0.041497	0.1132	0.10786	0.10893	0.10604	0.1886	0.04657	0.028968	0.112	0.094436	0.11158	0.045344		0.15284
20	1	Female	1859.92	Large	0.4947	0.48416	0.41439	0.45107		0.28225	0.29517	0.27017	0.32168		0.1353	0.12544	0.098271	0.08866	0.081661	0.14334	0.067759	0.078702	0.15267	0.063907	0.22073	-0.019331		0.17055
20	2	Female	1879.05	Large	0.58845	0.52465	0.41634	0.43286		0.29089	0.32226	0.32469	0.3486		-0.020607	0.057432	0.23928	0.078537	0.037634	0.1452	0.04939	0.038512	0.11476	0.04933	0.1976	0.085343		0.23408
20	3	Female	1906.06	Large	0.46178	0.46468	0.36824	0.53051		0.29706	0.33388	0.27623	0.35202		0.15531	0.14188	0.14383	0.088946	0.078496	0.13627	0.094337	0.088829	0.1006	0.15528	0.19731	-0.010492		0.18926
20	4	Female	1855.68	Large	0.52018	0.50332	0.43574	0.44989		0.1625	0.32009	0.29269	0.33816		-0.0014525	0.10718	0.19213	0.082627	0.095165	0.18516	0.086937	0.077543	0.036099	0.016926	0.16519	0.05087		0.010703
20	5	Female	1889.02	Large	0.44724	0.56326	0.3721	0.46313		0.25256	0.3182	0.26668	0.29429		0.0076918	0.088865	0.2	0.07619	0.12256	0.14606	0.088462	0.062389	0.091831	0.019381	0.17664	0.071499		0.12186
20	6	Female	1869	Large	0.50348	0.44085	0.59296	0.46996		0.34823	0.3371	0.28937	0.31979		0.086422	0.081241	0.2192	0.0673	0.062893	0.10309	0.069589	0.037437	0.095852	0.078579	0.19533	0.053902		0.28921
21	1	Female	1799.61	Large	0.43511	0.44628	0.48315	0.54835		0.27286	0.32656	0.28373	0.38873		0.09299	-0.0058756	-0.039865	0.048927	0.036611	0.042681	0.0010862	-0.0044828	0.024711	0.046477	0.20218	0.080147		0.45371
21	2	Female	1815.94	Large	0.49363	0.48457	0.38582	0.58183		0.29556	0.33144	0.29583	0.35521		0.087097	0.00055755	0.11596	0.072147	0.037952	-0.087653	0.010766	0.022319	0.010094	0.20127	0.23112	0.019618		0.21248
21	3	Female	1830.13	Large	0.51932	0.47768	0.47096	0.54067		0.29085	0.33746	0.27667	0.39444		0.053378	-0.010732	0.11178	0.060942	-0.055088	-0.1846	-0.035141	-0.0070029	0.051668	0.25491	0.12517	0.072204		0.16037
21	4	Female	1827.93	Large	0.48095	0.50916	0.4689	0.55651		0.26503	0.33727	0.27978	0.2905		0.038049	0.032336	0.1488	0.055419	0.03786	-0.074283	0.007066	0.020494	0.022913	0.12474	0.16725	0.027969		0.041157
21	5	Female	1818.26	Large	0.48388	0.2681	0.50083	0.60416		0.37955	0.32794	0.2686	0.38084		0.017331	0.0056003	0.027281	0.044437	-0.050693	-0.16364	0.0042443	0.017734	0.095023	0.15766	0.13377	0.047589		0.16896
21	6	Female	1799.28	Large	0.44919	0.39441	0.40556	0.56202		0.30104	0.33052	0.28596	0.40082		0.039946	0.095086	0.055694	0.04017	-0.034439	-0.16073	0.03183	0.03114	0.013839	0.16276	0.15524	0.0082201		0.19887
22	1	Female	1570.45	Small	0.40837	0.38227	0.42486	0.43458		0.33492	0.36114	0.32862	0.4241		0.060961	0.035958	0.0046934	-0.087079	-0.14054	-0.19702	-0.017883	-0.023513	0.0084106	-0.029994	0.032692	-0.058677		0.41335
22	2	Female	1623.69	Small	0.41198	0.44443	0.46282	0.48463		0.28273	0.35134	0.32714	0.37621		0.050982	0.07476	0.053977	-0.070504	-0.21989	-0.1892	-0.041657	-0.041756	-0.11402	0.13393	0.069963	-0.14358		0.38848
22	3	Female	1613.74	Small	0.49347	0.31681	0.39351	0.42311		0.38587	0.35659	0.28975	0.33809		-0.031268	-0.0024818	0.022726	-0.056057	-0.18406	-0.13292	-0.045463	-0.038884	-0.037238	0.0049448	0.026459	-0.059614		0.41242
22	4	Female	1619.78	Small	0.44101	0.38093	0.41434	0.43125		0.34146	0.34131	0.29972	0.37649		-0.04068	0.028875	0.062964	-0.049978	-0.12432	-0.10198	-0.024498	-0.01869	-0.060595	0.021463	0.035472	-0.057502		0.39132
22	5	Female	1611.42	Small	0.36337	0.49825	0.30303	0.43573		0.344	0.36272	0.30062	0.4367		0.10162	6.2004e-05	0.045612	-0.044183	-0.21111	-0.20072	-0.062318	-0.050373	-0.05226	0.065876	0.022858	-0.023454		0.39692
22	6	Female	1592.69	Small	0.45887	0.45421	0.32776	0.37002		0.33602	0.33593	0.31111	0.39553		-0.01981	-0.031903	0.022375	-0.063534	-0.13422	-0.097542	-0.052267	-0.042493	-0.036141	-0.02756	0.021479	-0.057182		0.28411
23	1	Female	1587.82	Small	0.44483	0.38359	0.39165	0.43217		0.35572	0.33796	0.31058	0.41041		-0.013609	-0.15816	-0.135	-0.047179	-0.11705	-0.075492	-0.0099376	-0.082825	-0.080548	-0.17692	0.041228	-0.16163		0.2174
23	2	Female	1631.58	Small	0.45443	0.39433	0.37491	0.42859		0.30984	0.36161	0.33202	0.35774		-0.045806	-0.18247	0.01134	-0.038403	-0.18016	-0.21986	-0.055859	-0.076207	-0.060751	-0.17979	0.066754	-0.066987		0.38193
23	3	Female	1631.64	Small	0.43289	0.55561	0.41538	0.3526		0.35992	0.35345	0.30692	0.42748		-0.046621	-0.18599	0.036085	-0.034954	-0.20507	-0.24688	-0.088396	-0.099373	-0.079697	-0.075401	0.077443	-0.046918		0.37299
23	4	Female	1625.23	Small	0.41912	0.59157	0.41931	0.45624		0.37338	0.36495	0.28354	0.41745		0.048661	-0.1776	0.080164	-0.046562	-0.21461	-0.22072	-0.072007	-0.083869	-0.034579	-0.099744	0.081252	-0.062493		0.33084
23	5	Female	1631.19	Small	0.40856	0.52721	0.38389	0.39817		0.33665	0.35854	0.33823	0.39775		0.013847	-0.1904	-0.041408	-0.066264	-0.13131	-0.10315	-0.026152	-0.082636	-0.092393	-0.31703	0.083955	-0.079838		0.3341
23	6	Female	1594.42	Small	0.40235	0.48409	0.38943	0.38271		0.30574	0.33959	0.26616	0.43883		0.044055	-0.19075	-0.00043346	-0.070564	-0.19543	-0.16353	-0.081815	-0.10037	-0.070253	-0.16491	0.068148	-0.093181		0.36943
24	1	Female	1883.57	Large	0.40673	0.47516	0.50516	0.55468		0.34829	0.35505	0.25903	0.37904		0.1737	0.12999	0.079388	0.094843	0.078332	0.039024	0.108	0.076183	0.11422	0.13543	0.26416	0.075122		0.37016
24	2	Female	1900.82	Large	0.42658	0.52909	0.39432	0.48155		0.31567	0.32317	0.28229	0.34619		0.12958	0.070671	0.10789	0.088332	0.16429	0.081371	0.089302	0.052385	0.14333	0.078033	0.21998	0.12865		0.13392
24	3	Female	1924.31	Large	0.49223	0.64391	0.46648	0.54685		0.28701	0.3233	0.30735	0.33855		0.0093431	0.11597	0.15839	0.087369	0.12205	0.10712	0.081698	0.062224	0.064639	0.11035	0.22358	0.071353		0.0046585
24	4	Female	1910.97	Large	0.50282	0.5348	0.40019	0.51301		0.24176	0.31286	0.19427	0.27808		0.18392	0.078238	0.057148	0.1282	0.11399	0.065399	0.078099	0.061196	0.1665	0.16906	0.21203	0.080536		0.088458
24	5	Female	1910.01	Large	0.49592	0.60324	0.37768	0.43713		0.29678	0.33902	0.29521	0.39253		0.081138	0.0092877	0.082706	0.1228	0.11207	0.13591	0.075877	0.049179	0.15592	0.15896	0.24646	0.12352		0.20316
24	6	Female	1895.77	Large	0.49802	0.44897	0.46459	0.4469		0.33955	0.30239	0.2643	0.32254		0.062927	0.057263	0.096875	0.10911	0.091182	0.12673	0.081352	0.039356	0.12399	0.052548	0.2174	0.023418		0.24974
25	1	Female	1812.85	Large	0.43791	0.556	0.42641	0.43052		0.36252	0.28504	0.26623	0.36134		0.1619	0.12767	0.088406	0.040785	-0.021346	-0.071324	-0.039949	0.021993	0.015155	0.21463	0.18958	0.14988		-0.014614
25	2	Female	1845.22	Large	0.55632	0.48671	0.54134	0.48052		0.32293	0.34929	0.26355	0.29189		0.12363	0.19537	0.08049	0.079794	0.010536	-0.033081	0.015263	0.033901	0.040818	0.17013	0.20163	0.059607		0.1064
25	3	Female	1862.74	Large	0.48566	0.46534	0.45784	0.47701		0.30641	0.32313	0.23438	0.40666		0.14637	0.22457	0.1254	0.066264	-0.020425	-0.038506	0.016862	0.0064519	0.040157	0.041394	0.17964	0.08674		0.30079
25	4	Female	1849.88	Large	0.45377	0.58041	0.51326	0.4521		0.30164	0.34359	0.27191	0.35615		0.059115	0.13793	0.15263	0.081906	0.0086828	0.0089399	0.024828	0.017946	0.056182	0.0051108	0.14779	0.11553		0.36641
25	5	Female	1846.94	Large	0.49085	0.60722	0.50824	0.49577		0.27922	0.3356	0.22529	0.30252		0.10827	0.18586	0.22093	0.10846	0.028371	0.055018	0.032895	0.046612	0.031875	0.070018	0.13553	0.12509		0.29704
25	6	Female	1828.39	Large	0.44222	0.58002	0.53628	0.45433		0.28952	0.35079	0.25314	0.41037		0.083951	0.17637	0.20575	0.10295	-0.056231	0.00090918	-0.0083906	0.018449	0.052719	0.14939	0.12196	0.13126		0.3334
