# Supplementary material for: Uncovering a ‘sensitive window’ of multisensory and motor neuroplasticity in the cerebrum and cerebellum of male and female starlings
Source: eLife. 2021 Jun 7;10:e66777. doi: 10.7554/eLife.66777 (PMC8219385; doi:10.7554/eLife.66777)
Supplement: Figure 8—source data 1. [file elife-66777-fig8-data1.xlsx]

## Sheet: Sheet1
subject_nr	time	sex	Brainsize	L/S	INT_s2vFA_HVC_L	INT_s2vFA_HVC_R	INT_s2vFA_NCM_L	INT_s2vFA_RA_L	TIME_s2vFA_AreaX_Caud_L	TIME_s2vFA_AreaX_Caud_R	TIME_s2vFA_AreaX_Rost_L	TIME_s2vFA_AreaX_Rost_R	TIME_s2vFA_AreaX_Rost_med_L	TIME_s2vFA_AreaX_Caud_med_R	TIME_s2vFA_FA_L	TIME_s2vFA_FPL_L	TIME_s2vFA_GP_L	TIME_s2vFA_GP_R	TIME_s2vFA_GP_sup_R	TIME_s2vFA_HVC_sur_R	TIME_s2vFA_LAM_L	TIME_s2vFA_LMAN_L	TIME_s2vFA_LaMed_L	TIME_s2vFA_RA_L	TIME_s2vFA_RA_R	TIME_s2vFA_TSM_R	TIME_s2vFA_opt_L	TIME_s2vFA_opt_R	TIME_s2vFA_tFA_R	TIME_s2vFA_tOM_L	TIME_s2vFA_tOM_R	TIME_s2vFA_cerebellum	INT_s2vMD_HVC_L	INT_s2vMD_HVC_R	INT_s2vMD_NCM_L	INT_s2vMD_RA_L	TIME_s2vMD_AreaX_Caud_L	TIME_s2vMD_AreaX_Caud_R	TIME_s2vMD_AreaX_Rost_L	TIME_s2vMD_AreaX_Rost_R	TIME_s2vMD_AreaX_Rost_med_L	TIME_s2vMD_AreaX_Caud_med_R	TIME_s2vMD_FA_L	TIME_s2vMD_FPL_L	TIME_s2vMD_GP_L	TIME_s2vMD_GP_R	TIME_s2vMD_GP_sup_R	TIME_s2vMD_HVC_sur_R	TIME_s2vMD_LAM_L
1	1	Male	1904.7	Large	0.178604	0.176106	0.153227	0.257991	0.193031	0.185096	0.207063	0.231214	0.218429	0.251947	0.356343	0.489325	0.318058	0.28714	0.251823	0.137958	0.194409	0.222492	0.254697	0.234991	0.212048	0.428589	0.41499	0.317287	0.247688	0.443724	0.447246	0.322963	0.815426	0.849305	0.804477	0.784151	0.615659	0.632613	0.639246	0.659943	0.645922	0.635307	0.778086	0.561376	0.680452	0.688948	0.727092	0.798793	0.679731
1	2	Male	1899.3	Large	0.179732	0.183128	0.171657	0.257321	0.217517	0.204979	0.183233	0.213194	0.209231	0.219318	0.337313	0.485906	0.318944	0.262252	0.238239	0.170042	0.246763	0.241152	0.288816	0.235712	0.218558	0.386234	0.400771	0.322772	0.284907	0.437597	0.419491	0.322427	0.798419	0.837723	0.767908	0.747406	0.623504	0.62271	0.631515	0.667728	0.62836	0.629356	0.827559	0.547722	0.682495	0.698907	0.697455	0.777746	0.709723
1	3	Male	1900.2	Large	0.162974	0.155565	0.184295	0.234921	0.208351	0.195091	0.191468	0.228053	0.221673	0.2287	0.348604	0.509107	0.3028	0.273275	0.23068	0.141915	0.218124	0.208509	0.291167	0.224531	0.220099	0.397794	0.382802	0.270969	0.307986	0.462814	0.456794	0.321386	0.825159	0.845584	0.801377	0.790436	0.624122	0.638328	0.662231	0.676944	0.668628	0.636297	0.900358	0.585978	0.705065	0.719593	0.73988	0.801095	0.733296
1	4	Male	1899	Large	0.167679	0.163994	0.154877	0.204242	0.198242	0.203849	0.192139	0.211976	0.236612	0.241127	0.410552	0.517626	0.302166	0.282313	0.195968	0.145018	0.214421	0.235113	0.332564	0.232162	0.209028	0.433793	0.416316	0.396003	0.298014	0.487302	0.460415	0.338007	0.840924	0.871197	0.802394	0.821429	0.647523	0.667286	0.651416	0.66836	0.640259	0.650274	0.756435	0.587686	0.755413	0.746705	0.757261	0.796889	0.724223
1	5	Male	1896.7	Large	0.172479	0.176711	0.144988	0.231295	0.195412	0.183039	0.178232	0.206815	0.200371	0.188118	0.379386	0.494043	0.292516	0.233962	0.212787	0.139577	0.207252	0.22359	0.286978	0.25263	0.258217	0.449902	0.484409	0.377256	0.320766	0.452196	0.408552	0.352129	0.854306	0.873814	0.820876	0.817907	0.673659	0.67801	0.676623	0.700754	0.685077	0.690646	0.651305	0.585724	0.712321	0.72327	0.731236	0.831674	0.748807
1	6	Male	1904.7	Large	0.168624	0.166669	0.139383	0.22868	0.235962	0.21163	0.225485	0.235238	0.256926	0.242562	0.431435	0.510982	0.325784	0.296367	0.240462	0.163854	0.239689	0.242362	0.308499	0.248892	0.233584	0.43111	0.448591	0.444715	0.353352	0.480448	0.446864	0.341859	0.857837	0.873783	0.824886	0.823544	0.655518	0.659689	0.649247	0.67578	0.664002	0.649834	0.760099	0.61472	0.765668	0.757393	0.765448	0.810572	0.746306
2	1	Male	1794.5	Small	0.133386	0.131184	0.125116	0.226859	0.1967	0.19402	0.17115	0.208897	0.165506	0.20112	0.315888	0.444544	0.329009	0.288772	0.288222	0.125908	0.255231	0.250221	0.291393	0.226891	0.225068	0.414126	0.360776	0.256635	0.239791	0.45329	0.467202	0.341046	0.817214	0.849922	0.803925	0.812176	0.628437	0.635903	0.627516	0.662498	0.655446	0.632246	1.07605	0.573755	0.742986	0.744988	0.7663	0.801632	0.725941
2	2	Male	1776.3	Small	0.131304	0.141662	0.143903	0.27949	0.209009	0.183763	0.195912	0.196743	0.184661	0.190901	0.374976	0.456309	0.32381	0.251206	0.276285	0.135683	0.276752	0.257629	0.311571	0.269941	0.24275	0.405096	0.408889	0.301483	0.271143	0.469822	0.418662	0.3744	0.751928	0.78879	0.753964	0.721834	0.633445	0.645504	0.647914	0.675451	0.655665	0.624141	0.732354	0.573684	0.688196	0.719116	0.711972	0.771511	0.700646
2	3	Male	1777.5	Small	0.133283	0.139284	0.112423	0.248184	0.200141	0.191695	0.201963	0.203403	0.203759	0.227165	0.397166	0.435288	0.319795	0.273689	0.272259	0.162937	0.279679	0.224365	0.309149	0.267699	0.236759	0.392033	0.444348	0.336335	0.292313	0.481125	0.462642	0.362882	0.82082	0.847483	0.813548	0.820296	0.634354	0.659075	0.668368	0.702012	0.678967	0.641158	0.771585	0.586493	0.744214	0.757535	0.770025	0.799385	0.73256
2	4	Male	1772.9	Small	0.155147	0.151782	0.137044	0.24085	0.218509	0.202885	0.2013	0.232989	0.234622	0.236711	0.407846	0.487467	0.316362	0.273867	0.279473	0.158334	0.265803	0.235308	0.330628	0.261536	0.224506	0.432763	0.423055	0.335028	0.296725	0.485206	0.470064	0.363944	0.815324	0.837683	0.796628	0.799556	0.649591	0.651931	0.643362	0.684273	0.648405	0.640552	0.815734	0.602379	0.760325	0.756272	0.752108	0.784801	0.730664
2	5	Male	1755.2	Small	0.158426	0.153296	0.130435	0.259337	0.217225	0.182982	0.177177	0.20928	0.214504	0.19938	0.409798	0.432678	0.322745	0.28514	0.28237	0.159793	0.288134	0.263682	0.332592	0.268385	0.233051	0.436751	0.466695	0.342713	0.337841	0.477765	0.433728	0.366208	0.854825	0.876639	0.840197	0.82334	0.663283	0.665354	0.661921	0.707652	0.658955	0.656316	0.806897	0.567437	0.752635	0.737559	0.764869	0.818892	0.745613
2	6	Male	1794.5	Small	0.148496	0.134343	0.140122	0.246394	0.205057	0.213214	0.223346	0.236435	0.190873	0.217969	0.393307	0.474545	0.325449	0.304519	0.308351	0.158639	0.257685	0.243617	0.306813	0.25801	0.250591	0.411246	0.431148	0.382506	0.354988	0.456454	0.429808	0.354172	0.841968	0.870972	0.823298	0.808491	0.63297	0.639487	0.635426	0.698164	0.651131	0.636181	0.78762	0.5593	0.739188	0.735596	0.733247	0.79745	0.744999
3	1	Male	1777.3	Small	0.155561	0.167286	0.148394	0.25156	0.20587	0.199124	0.198897	0.229842	0.208696	0.231731	0.359085	0.482635	0.32186	0.29454	0.257009	0.14817	0.239859	0.256658	0.301859	0.240916	0.240139	0.417359	0.345224	0.302097	0.302435	0.464631	0.436275	0.335128	0.808844	0.836722	0.791105	0.80485	0.62547	0.648266	0.634402	0.670997	0.657247	0.616885	0.873319	0.563122	0.716977	0.728774	0.714421	0.795109	0.693622
3	2	Male	1773.3	Small	0.147553	0.174689	0.140832	0.252711	0.221874	0.204131	0.200761	0.224932	0.229127	0.213935	0.396629	0.467051	0.310682	0.273412	0.261354	0.135768	0.218836	0.243914	0.289891	0.246389	0.234423	0.424582	0.401229	0.289678	0.328392	0.486521	0.469768	0.336264	0.822087	0.844047	0.807737	0.839942	0.640301	0.649515	0.637683	0.684766	0.645098	0.642963	0.813082	0.576187	0.737925	0.759388	0.751495	0.813285	0.733223
3	3	Male	1775.2	Small	0.160283	0.166904	0.153989	0.219951	0.221416	0.213948	0.223284	0.229819	0.237175	0.20593	0.442874	0.479552	0.318965	0.273531	0.271577	0.136428	0.219644	0.23937	0.294999	0.270143	0.226244	0.405849	0.459932	0.378229	0.393958	0.498394	0.474589	0.3649	0.868293	0.875335	0.836823	0.845221	0.694353	0.706991	0.679128	0.70731	0.662622	0.688454	0.749291	0.6182	0.789288	0.786814	0.790108	0.830724	0.757056
3	4	Male	1772.3	Small	0.159551	0.176204	0.157701	0.22764	0.186177	0.206036	0.214204	0.231175	0.19023	0.206928	0.412136	0.482607	0.319137	0.268534	0.252592	0.138601	0.266907	0.275566	0.281253	0.263511	0.229753	0.444321	0.45059	0.356897	0.432015	0.50408	0.474553	0.346947	0.881822	0.885984	0.862677	0.840244	0.676377	0.678371	0.667282	0.700806	0.684695	0.654718	0.765314	0.617182	0.768947	0.780686	0.795158	0.845132	0.777869
3	5	Male	1770.6	Small	0.159533	0.175568	0.142397	0.226074	0.216826	0.190028	0.199903	0.23276	0.175758	0.218114	0.446224	0.476619	0.331766	0.273524	0.279887	0.152595	0.235604	0.244295	0.272776	0.258542	0.241791	0.450378	0.455753	0.356183	0.349355	0.468314	0.447831	0.358339	0.906998	0.915047	0.910801	0.889889	0.681592	0.69125	0.676239	0.705235	0.686735	0.659621	0.797358	0.60994	0.79191	0.813702	0.806909	0.86329	0.798498
3	6	Male	1777.3	Small	0.139538	0.145497	0.140234	0.256316	0.221838	0.23811	0.193813	0.238864	0.181722	0.249742	0.386323	0.518619	0.336069	0.276034	0.257804	0.130416	0.214478	0.24792	0.273866	0.243742	0.223658	0.420246	0.38708	0.288101	0.343556	0.475422	0.471962	0.337983	0.797156	0.823968	0.785753	0.818155	0.644194	0.666553	0.635563	0.67125	0.642114	0.64323	0.892619	0.608041	0.755251	0.728185	0.740609	0.779697	0.741618
4	1	Male	1812	Small	0.14037	0.13901	0.142356	0.215464	0.195199	0.182477	0.17355	0.201537	0.202347	0.209903	0.375388	0.465889	0.284555	0.243542	0.212297	0.132235	0.222752	0.250895	0.239044	0.225644	0.197781	0.411497	0.375898	0.360949	0.272577	0.448158	0.418017	0.333069	0.866376	0.883564	0.847436	0.829796	0.646338	0.672735	0.668512	0.704286	0.656159	0.672738	0.811309	0.586458	0.772013	0.745295	0.767263	0.828186	0.73652
4	2	Male	1802.2	Small	0.129752	0.150762	0.145047	0.277435	0.211995	0.21267	0.186608	0.20161	0.188355	0.201773	0.324102	0.501073	0.288762	0.224596	0.295381	0.126892	0.18985	0.243017	0.266861	0.219573	0.218846	0.419468	0.351309	0.314156	0.237519	0.450021	0.443657	0.355225	0.807166	0.81542	0.77945	0.713764	0.652191	0.630988	0.649591	0.715372	0.65148	0.638347	0.929104	0.586347	0.717118	0.713021	0.592641	0.782523	0.715224
4	3	Male	1801.7	Small	0.142182	0.165687	0.150759	0.200214	0.194311	0.200417	0.192247	0.219054	0.209327	0.221834	0.370564	0.45879	0.279185	0.244881	0.219552	0.126054	0.225623	0.241879	0.259702	0.227764	0.188568	0.457083	0.373334	0.320223	0.246598	0.458382	0.419435	0.355666	0.843261	0.866412	0.812463	0.831746	0.651421	0.670658	0.681549	0.691572	0.680115	0.654453	0.863371	0.599259	0.74221	0.756497	0.760967	0.824269	0.722837
4	4	Male	1801.4	Small	0.144457	0.160662	0.143532	0.215956	0.236533	0.219908	0.217059	0.228826	0.235215	0.243777	0.359925	0.495809	0.31853	0.260677	0.257115	0.130787	0.249634	0.256735	0.281616	0.242183	0.197951	0.428893	0.373455	0.322864	0.292037	0.476151	0.462778	0.362998	0.846011	0.869262	0.817395	0.82667	0.645215	0.665667	0.664323	0.697378	0.643778	0.661447	0.95425	0.634549	0.782125	0.766415	0.769154	0.821244	0.741849
4	5	Male	1800.3	Small	0.122942	0.143497	0.133044	0.2027	0.217733	0.202088	0.21877	0.215961	0.197568	0.236339	0.388677	0.510641	0.296212	0.270857	0.270043	0.134099	0.213617	0.253526	0.322258	0.20984	0.203499	0.422493	0.383082	0.346385	0.305437	0.471386	0.441098	0.353035	0.869931	0.883652	0.852776	0.862384	0.653117	0.657721	0.674322	0.69875	0.643527	0.632092	0.822181	0.585002	0.763008	0.726679	0.757833	0.846504	0.756248
4	6	Male	1812	Small	0.127006	0.143415	0.141011	0.223388	0.219894	0.212733	0.178339	0.227495	0.231132	0.231224	0.377102	0.491238	0.315304	0.291858	0.262878	0.139408	0.195673	0.243868	0.257131	0.228763	0.21616	0.445087	0.389647	0.340577	0.234138	0.46913	0.440986	0.340796	0.833862	0.851388	0.806396	0.8188	0.641767	0.652518	0.669084	0.677942	0.640036	0.627637	0.853782	0.617103	0.775673	0.764311	0.756976	0.811094	0.738488
5	1	Male	1929.32	Large	0.107681	0.123295	0.0959814	0.200052	0.204888	0.173546	0.172752	0.187063	0.191111	0.202001	0.367434	0.475179	0.309653	0.226173	0.232141	0.120408	0.197847	0.229164	0.277131	0.242964	0.207424	0.444102	0.404554	0.375266	0.351122	0.455948	0.416042	0.321337	0.815343	0.829247	0.788277	0.785944	0.638212	0.638555	0.654226	0.672857	0.660333	0.638563	0.773113	0.581769	0.714407	0.705748	0.69903	0.785789	0.70004
5	2	Male	1909.34	Large	0.129497	0.146603	0.1209	0.190753	0.218082	0.205189	0.204695	0.214613	0.205752	0.214359	0.374071	0.456096	0.30033	0.250201	0.24805	0.134095	0.204596	0.249066	0.299012	0.252152	0.201348	0.433082	0.42956	0.34397	0.344108	0.471719	0.461551	0.293378	0.79316	0.808287	0.777443	0.764846	0.663033	0.635962	0.630618	0.657686	0.637678	0.638177	0.810964	0.601377	0.756829	0.720802	0.722177	0.741933	0.745598
6	1	Male	1807.6	Small	0.140897	0.139192	0.124977	0.260659	0.196424	0.180939	0.175498	0.184309	0.201663	0.179295	0.372312	0.460046	0.310342	0.260078	0.249763	0.148014	0.198369	0.220833	0.256695	0.249967	0.215672	0.423655	0.369253	0.332527	0.234312	0.472107	0.464802	0.331333	0.806839	0.832637	0.784123	0.774506	0.62997	0.645772	0.65088	0.678068	0.652562	0.636388	0.797071	0.560546	0.683504	0.696802	0.703302	0.798509	0.691079
6	2	Male	1803.9	Small	0.160054	0.153486	0.121787	0.239595	0.221668	0.209597	0.17831	0.201701	0.194971	0.190163	0.367191	0.45978	0.302373	0.267844	0.255637	0.153275	0.228557	0.261466	0.27264	0.25998	0.21176	0.420432	0.398508	0.286704	0.244529	0.476093	0.450233	0.336362	0.79805	0.819822	0.776234	0.803946	0.633678	0.616281	0.652521	0.665625	0.646462	0.628155	0.799277	0.560332	0.69366	0.691347	0.721286	0.781752	0.669335
6	3	Male	1803.4	Small	0.173721	0.170204	0.15044	0.233001	0.256732	0.205411	0.19114	0.222749	0.253402	0.237955	0.400323	0.523741	0.311491	0.255856	0.22807	0.180614	0.235032	0.246084	0.293765	0.269482	0.209638	0.465296	0.422579	0.364913	0.254741	0.500213	0.476561	0.336383	0.839962	0.872891	0.799776	0.821425	0.632258	0.634553	0.626486	0.674473	0.646193	0.63317	0.74019	0.51839	0.703663	0.718575	0.742502	0.809287	0.711374
6	4	Male	1803.7	Small	0.135385	0.140147	0.12851	0.214077	0.198684	0.21605	0.216811	0.23209	0.225935	0.194586	0.408396	0.508783	0.324579	0.289817	0.23164	0.151034	0.26506	0.244202	0.272667	0.273087	0.247013	0.441204	0.415266	0.371514	0.287994	0.512819	0.49971	0.339256	0.856896	0.897565	0.836236	0.839407	0.651918	0.662855	0.671009	0.688165	0.65358	0.651858	0.789119	0.600958	0.74305	0.774597	0.777449	0.831308	0.727875
6	5	Male	1800.2	Small	0.182544	0.173646	0.134665	0.239336	0.207248	0.218084	0.197112	0.235782	0.18882	0.179755	0.429314	0.510785	0.351497	0.27665	0.270301	0.180986	0.270544	0.287633	0.243439	0.288105	0.264937	0.437539	0.455535	0.382381	0.290874	0.498244	0.481032	0.366834	0.862711	0.900948	0.838466	0.816251	0.634026	0.633629	0.58657	0.631802	0.619472	0.603398	0.741196	0.547063	0.727713	0.726636	0.761898	0.83532	0.741274
6	6	Male	1807.6	Small	0.152332	0.138146	0.122741	0.218273	0.212059	0.216125	0.23385	0.256838	0.233528	0.258065	0.341725	0.488993	0.363056	0.311403	0.273963	0.161457	0.238299	0.252283	0.275188	0.274183	0.235277	0.460745	0.339148	0.283229	0.230997	0.486339	0.487961	0.312662	0.8272	0.847202	0.81025	0.831937	0.661865	0.66081	0.650967	0.672095	0.656207	0.63924	1.14155	0.655527	0.750049	0.759026	0.778627	0.828899	0.74678
7	1	Male	1861.8	Large	0.136659	0.153146	0.157183	0.242904	0.209543	0.183055	0.180824	0.203893	0.213362	0.22477	0.32938	0.461351	0.283659	0.234965	0.244727	0.103184	0.180806	0.229641	0.282318	0.231254	0.220089	0.417789	0.349252	0.280811	0.246702	0.440479	0.421326	0.328117	0.833303	0.847332	0.821086	0.801655	0.639047	0.669138	0.661379	0.69463	0.656461	0.660661	0.798287	0.587801	0.706629	0.741482	0.734803	0.808258	0.71255
7	2	Male	1860.8	Large	0.141641	0.164864	0.154447	0.261889	0.227834	0.206016	0.201056	0.219494	0.247302	0.228297	0.356643	0.474697	0.32201	0.255888	0.268987	0.121674	0.181901	0.239294	0.276917	0.239444	0.202234	0.403243	0.36854	0.266033	0.252343	0.462438	0.444165	0.346049	0.789195	0.806187	0.767428	0.779603	0.618708	0.626473	0.643068	0.668182	0.632665	0.624823	0.819325	0.576692	0.70731	0.702033	0.715095	0.771092	0.697629
7	3	Male	1859.2	Large	0.145818	0.16997	0.148005	0.21879	0.233266	0.216848	0.22059	0.246159	0.245628	0.278945	0.409985	0.471069	0.310998	0.250775	0.255306	0.130535	0.19786	0.274132	0.288418	0.237895	0.2053	0.36154	0.414912	0.318868	0.308293	0.486518	0.484943	0.343075	0.845831	0.865362	0.818344	0.827276	0.681115	0.669764	0.651385	0.680527	0.652854	0.671515	0.794562	0.616257	0.765511	0.750954	0.771297	0.820558	0.754928
7	5	Male	1855.8	Large	0.147052	0.169721	0.137608	0.214945	0.263271	0.226435	0.202782	0.242973	0.182819	0.249055	0.398943	0.473339	0.332349	0.271286	0.27243	0.122708	0.204855	0.314554	0.334506	0.217943	0.220211	0.443893	0.381611	0.322294	0.359305	0.473103	0.480569	0.362377	0.862947	0.896133	0.851228	0.831246	0.63463	0.660108	0.673781	0.700557	0.663098	0.664534	0.834834	0.624943	0.733731	0.747653	0.75624	0.822125	0.7629
7	6	Male	1861.8	Large	0.151014	0.162916	0.145617	0.232155	0.236813	0.2109	0.219282	0.245352	0.211166	0.247443	0.385686	0.517081	0.322719	0.272083	0.28076	0.127678	0.195171	0.27033	0.315359	0.237077	0.205925	0.430919	0.40183	0.295012	0.449582	0.458726	0.4289	0.349605	0.83064	0.865236	0.813697	0.859497	0.65941	0.694522	0.676739	0.694288	0.683209	0.675732	0.844032	0.618835	0.77901	0.772369	0.777874	0.812792	0.742889
8	1	Male	1739.3	Small	0.134207	0.147292	0.118537	0.250343	0.194412	0.170027	0.196333	0.200868	0.199169	0.185624	0.344277	0.433808	0.29291	0.236137	0.253139	0.118742	0.197592	0.239219	0.256581	0.24041	0.218012	0.412578	0.387721	0.288963	0.274279	0.457033	0.425202	0.337243	0.781485	0.797743	0.768392	0.782969	0.628854	0.625481	0.629968	0.66248	0.643772	0.618186	0.878664	0.544987	0.713074	0.704244	0.717749	0.764542	0.696362
8	2	Male	1725.4	Small	0.157556	0.151416	0.148816	0.270729	0.206915	0.180905	0.186767	0.20321	0.212798	0.223263	0.33537	0.449884	0.293915	0.274619	0.267154	0.166883	0.211887	0.269272	0.288863	0.25334	0.233679	0.396613	0.376934	0.265753	0.251712	0.456837	0.442629	0.335594	0.773529	0.803723	0.736061	0.750921	0.624772	0.624538	0.640243	0.663883	0.641592	0.619642	0.884783	0.545305	0.679571	0.687562	0.69245	0.756991	0.660664
8	3	Male	1724.9	Small	0.167678	0.152392	0.150505	0.261682	0.211029	0.188165	0.19532	0.223479	0.253856	0.214194	0.380603	0.438026	0.323855	0.2468	0.242028	0.168537	0.231006	0.262106	0.326235	0.263449	0.226861	0.394011	0.38142	0.281826	0.261936	0.469334	0.459566	0.352023	0.814043	0.846049	0.796136	0.78559	0.645885	0.656238	0.65579	0.715205	0.658896	0.648794	0.814734	0.571794	0.690832	0.722294	0.717883	0.784035	0.713069
8	4	Male	1726.9	Small	0.162001	0.152389	0.146162	0.220962	0.203378	0.224313	0.226892	0.22433	0.229446	0.2422	0.382501	0.444267	0.306519	0.27549	0.279403	0.162317	0.240982	0.312195	0.321406	0.264902	0.209801	0.40821	0.44729	0.412887	0.339118	0.484159	0.484522	0.358003	0.829489	0.857506	0.79641	0.820343	0.634517	0.632575	0.618935	0.674625	0.650092	0.648547	0.783089	0.552397	0.735119	0.732281	0.756547	0.795983	0.729412
8	5	Male	1718.7	Small	0.164361	0.164164	0.129339	0.217432	0.189347	0.186685	0.19487	0.214401	0.202345	0.177169	0.384039	0.471002	0.31999	0.277791	0.247703	0.138097	0.223274	0.2691	0.29573	0.276866	0.259953	0.443494	0.513662	0.457952	0.270877	0.48082	0.456022	0.383716	0.848267	0.884961	0.831075	0.839748	0.668914	0.661073	0.68899	0.706129	0.66152	0.695051	0.781765	0.589774	0.756166	0.756144	0.788413	0.821257	0.7601
8	6	Male	1739.3	Small	0.121028	0.1289	0.111512	0.215168	0.197326	0.173094	0.193933	0.206109	0.193998	0.176398	0.336702	0.471534	0.332508	0.261361	0.26062	0.138892	0.224971	0.25469	0.29534	0.239322	0.227452	0.421878	0.380278	0.258247	0.256465	0.480085	0.446258	0.331638	0.84399	0.866676	0.823856	0.829782	0.676537	0.685682	0.666062	0.689681	0.651252	0.683682	1.01808	0.627184	0.782329	0.772109	0.776751	0.80324	0.759743
9	1	Male	1813.5	Large	0.163941	0.169856	0.152727	0.233108	0.185192	0.161112	0.140697	0.185111	0.177194	0.178092	0.345577	0.435586	0.301547	0.261368	0.233199	0.139333	0.177839	0.221402	0.264199	0.21823	0.213181	0.40091	0.363761	0.326422	0.269664	0.434732	0.412661	0.352078	0.843807	0.8558	0.795406	0.792894	0.651614	0.653073	0.663239	0.689463	0.65186	0.641901	0.82428	0.585597	0.713941	0.715282	0.729332	0.824058	0.717086
9	2	Male	1809.8	Large	0.180197	0.185961	0.181249	0.256223	0.194228	0.19374	0.171963	0.194691	0.220121	0.199506	0.314421	0.448646	0.320996	0.268169	0.238918	0.159638	0.165662	0.197761	0.26614	0.238802	0.211568	0.44116	0.361592	0.249513	0.224363	0.434617	0.438266	0.361513	0.789925	0.824645	0.770382	0.774083	0.630391	0.643767	0.644098	0.692622	0.646114	0.626333	0.792561	0.542402	0.672965	0.698976	0.693763	0.78711	0.693253
9	3	Male	1808.2	Large	0.190614	0.169465	0.173395	0.234611	0.222529	0.200023	0.197624	0.205853	0.22361	0.208685	0.334816	0.476805	0.323347	0.248335	0.237138	0.159405	0.187874	0.21731	0.301047	0.244671	0.209748	0.434344	0.352929	0.277464	0.260393	0.436513	0.430543	0.363962	0.827756	0.858743	0.792517	0.820012	0.636818	0.65151	0.651797	0.684203	0.649894	0.63782	0.869022	0.563105	0.733762	0.751633	0.738229	0.810298	0.708003
9	4	Male	1811.2	Large	0.179173	0.15943	0.168869	0.219566	0.218336	0.211478	0.18996	0.22624	0.242022	0.221126	0.348039	0.475699	0.338013	0.276156	0.244973	0.141629	0.205668	0.248306	0.297961	0.254418	0.228153	0.44613	0.347257	0.261878	0.289964	0.466894	0.443834	0.353587	0.838006	0.870362	0.807978	0.80803	0.633435	0.660713	0.65461	0.678204	0.628457	0.632209	0.915554	0.599055	0.735844	0.734404	0.759715	0.821662	0.751981
9	5	Male	1807.1	Large	0.168798	0.157528	0.146055	0.231901	0.208855	0.207295	0.186976	0.196559	0.176177	0.190914	0.370824	0.462902	0.309347	0.257979	0.235898	0.137286	0.175767	0.233707	0.305071	0.249659	0.208264	0.44688	0.421818	0.347712	0.293833	0.448657	0.401527	0.380192	0.846115	0.866512	0.827217	0.832441	0.661472	0.654547	0.636877	0.685712	0.641375	0.646158	0.825821	0.569969	0.77024	0.763664	0.782643	0.844401	0.753848
9	6	Male	1813.5	Large	0.170461	0.163955	0.165477	0.229132	0.227011	0.200635	0.179974	0.215444	0.191522	0.231119	0.366779	0.500978	0.314877	0.300463	0.242324	0.151217	0.197545	0.241972	0.280318	0.256636	0.215646	0.448623	0.411692	0.330257	0.280678	0.466741	0.470138	0.375713	0.834739	0.851052	0.821635	0.830176	0.674639	0.663732	0.646785	0.68176	0.648556	0.650639	0.871709	0.621643	0.777901	0.757768	0.771985	0.808365	0.759199
10	1	Male	1973.1	Large	0.158227	0.165167	0.108509	0.234161	0.211972	0.180541	0.175836	0.205378	0.216606	0.17835	0.335398	0.481715	0.276644	0.261912	0.265641	0.131358	0.203342	0.240203	0.256037	0.237577	0.211838	0.464969	0.352478	0.268621	0.236986	0.439988	0.439979	0.322076	0.7964	0.834202	0.769677	0.794004	0.644301	0.665322	0.658002	0.681204	0.66137	0.654955	0.92966	0.566354	0.723259	0.721251	0.731708	0.804522	0.706721
10	2	Male	1953.5	Large	0.198654	0.176076	0.138362	0.227967	0.231806	0.22607	0.178742	0.232609	0.259944	0.230358	0.340478	0.447147	0.310299	0.294332	0.288133	0.177258	0.253019	0.237199	0.284879	0.258098	0.217712	0.430653	0.374288	0.280629	0.292954	0.470206	0.471351	0.339551	0.821407	0.836661	0.784062	0.799485	0.613397	0.636276	0.642266	0.668579	0.644522	0.599565	0.923862	0.600826	0.718355	0.727393	0.736946	0.779557	0.719263
10	3	Male	1953.4	Large	0.178703	0.178773	0.144882	0.222029	0.207277	0.198813	0.195883	0.229656	0.269044	0.218007	0.3584	0.442772	0.303365	0.257697	0.259037	0.167345	0.237008	0.245932	0.252229	0.251275	0.218917	0.426795	0.378523	0.265446	0.27659	0.472832	0.447738	0.336908	0.841833	0.879015	0.809149	0.828485	0.634186	0.667447	0.66349	0.688669	0.653748	0.648534	0.853535	0.552272	0.734376	0.746517	0.756004	0.809784	0.726687
10	4	Male	1948.4	Large	0.175712	0.15794	0.118394	0.238127	0.218921	0.216068	0.211409	0.233336	0.242943	0.233335	0.389215	0.494195	0.323263	0.271001	0.260647	0.165083	0.222391	0.25287	0.281119	0.272855	0.230341	0.459862	0.39467	0.271412	0.313688	0.499074	0.486914	0.34707	0.797999	0.820675	0.770448	0.806697	0.662078	0.659675	0.643793	0.677202	0.644998	0.650295	0.890098	0.616885	0.764384	0.771281	0.761206	0.78162	0.72498
10	5	Male	1945.1	Large	0.181065	0.17213	0.128843	0.209755	0.24601	0.213682	0.201036	0.235346	0.225069	0.232772	0.39487	0.489835	0.338931	0.302189	0.304256	0.151821	0.235236	0.27489	0.292608	0.261033	0.214124	0.443295	0.394886	0.351917	0.352786	0.468235	0.465584	0.351972	0.852664	0.88189	0.825031	0.855495	0.682479	0.671757	0.647721	0.678268	0.651063	0.658524	0.864899	0.643543	0.786535	0.765571	0.773896	0.818287	0.759427
10	6	Male	1973.1	Large	0.174266	0.171113	0.109534	0.21733	0.224543	0.219904	0.201721	0.2369	0.257458	0.219259	0.359606	0.477721	0.315599	0.269537	0.271739	0.168883	0.207237	0.267933	0.273085	0.262057	0.234766	0.440504	0.369234	0.299388	0.330275	0.487779	0.461348	0.34265	0.831412	0.854076	0.808386	0.823431	0.679491	0.676836	0.652746	0.684086	0.64618	0.661847	1.00384	0.648436	0.793222	0.764402	0.757988	0.807467	0.762326
11	1	Male	1862.5	Large	0.162753	0.176797	0.152492	0.198362	0.209496	0.189655	0.190458	0.215829	0.190307	0.190423	0.330538	0.492208	0.29322	0.262728	0.236322	0.158813	0.215302	0.25451	0.283079	0.220528	0.197097	0.407269	0.326796	0.237088	0.260947	0.439511	0.441601	0.355524	0.785901	0.787071	0.763017	0.768891	0.614529	0.624768	0.637386	0.654586	0.652771	0.607074	0.875278	0.537381	0.69708	0.685227	0.715595	0.754035	0.693593
11	2	Male	1851.5	Large	0.159464	0.158963	0.156832	0.22726	0.192176	0.171147	0.182055	0.197705	0.197956	0.203783	0.330104	0.423769	0.287202	0.209641	0.202585	0.146449	0.235399	0.241053	0.28801	0.237705	0.185366	0.407332	0.316419	0.219179	0.242168	0.447151	0.411509	0.361592	0.780837	0.824635	0.751125	0.75663	0.623048	0.629831	0.638557	0.672843	0.663478	0.612118	0.793929	0.574081	0.678182	0.703695	0.697094	0.791719	0.689812
11	3	Male	1851.5	Large	0.198794	0.175318	0.161599	0.213778	0.212846	0.176617	0.183211	0.200322	0.200217	0.167437	0.35195	0.425481	0.28391	0.252261	0.186627	0.137318	0.225602	0.244827	0.308901	0.222631	0.208225	0.367439	0.370922	0.273222	0.277159	0.440905	0.423989	0.326997	0.820167	0.827887	0.802317	0.782457	0.641749	0.651125	0.663361	0.698431	0.677692	0.64848	0.801711	0.602815	0.702471	0.69879	0.709929	0.795853	0.709291
11	4	Male	1846.5	Large	0.164958	0.185524	0.154991	0.199874	0.210454	0.203396	0.217144	0.231884	0.212088	0.231382	0.399091	0.475742	0.324701	0.26131	0.235158	0.148339	0.256746	0.29485	0.32019	0.241741	0.215621	0.435157	0.401991	0.294797	0.296606	0.470805	0.46792	0.360376	0.808447	0.842822	0.792445	0.815442	0.638088	0.64087	0.651354	0.656467	0.637732	0.634141	0.806388	0.556037	0.72808	0.756485	0.765721	0.799218	0.716625
11	5	Male	1847.8	Large	0.153436	0.195649	0.153331	0.200241	0.20829	0.193578	0.205834	0.224379	0.217412	0.209444	0.396594	0.439014	0.32797	0.258424	0.251811	0.14754	0.23835	0.293247	0.291066	0.238652	0.238269	0.433835	0.398583	0.296892	0.328722	0.475745	0.45321	0.383705	0.828557	0.85372	0.815201	0.815099	0.643312	0.641968	0.651207	0.673394	0.645381	0.615693	0.798592	0.616361	0.74092	0.7276	0.749664	0.798003	0.742838
11	6	Male	1862.5	Large	0.151174	0.163361	0.146761	0.184862	0.209022	0.196823	0.189759	0.218163	0.209398	0.209413	0.396962	0.498839	0.322495	0.250897	0.237316	0.126576	0.229118	0.265656	0.303635	0.222839	0.22226	0.444824	0.386201	0.325368	0.343454	0.470149	0.443173	0.364173	0.824481	0.825116	0.809782	0.818873	0.668568	0.671009	0.66112	0.688316	0.653199	0.65934	0.846755	0.62083	0.774493	0.760927	0.781494	0.785901	0.763743
12	1	Male	1758	Small	0.128379	0.134094	0.138399	0.238763	0.194765	0.181195	0.171044	0.195207	0.199424	0.218389	0.333085	0.427051	0.279774	0.259108	0.265201	0.12492	0.171176	0.233946	0.260567	0.232311	0.193813	0.42629	0.372984	0.303855	0.261557	0.455876	0.428308	0.334004	0.845487	0.874858	0.793028	0.798593	0.644291	0.663476	0.664861	0.69033	0.655129	0.657124	0.884577	0.614594	0.716522	0.730383	0.72298	0.805638	0.706338
12	2	Male	1740.5	Small	0.132374	0.132129	0.137992	0.239891	0.21636	0.195092	0.17599	0.209343	0.207334	0.202621	0.314405	0.45094	0.306693	0.259116	0.269473	0.124269	0.197455	0.240438	0.240742	0.237207	0.197626	0.43146	0.356012	0.280255	0.235866	0.482731	0.436918	0.3326	0.859819	0.873663	0.821277	0.800071	0.651391	0.654902	0.658297	0.684342	0.68364	0.640812	1.01017	0.612917	0.711943	0.716383	0.749214	0.808572	0.731957
12	3	Male	1742.4	Small	0.17233	0.17373	0.162679	0.19795	0.237889	0.234814	0.22236	0.272005	0.252863	0.241482	0.354318	0.473904	0.286343	0.284928	0.252517	0.131757	0.256772	0.238902	0.273376	0.241604	0.180477	0.396396	0.365466	0.311967	0.256775	0.465938	0.430778	0.341023	0.92853	0.946933	0.87056	0.837834	0.647449	0.640218	0.619265	0.63715	0.62531	0.644904	0.955557	0.591189	0.718886	0.731655	0.735548	0.880166	0.741192
12	4	Male	1743	Small	0.129328	0.125085	0.137498	0.209982	0.219382	0.211876	0.184832	0.219847	0.185338	0.245063	0.340716	0.471846	0.297788	0.271878	0.23992	0.123177	0.211949	0.266483	0.267772	0.240017	0.208271	0.433089	0.376652	0.327851	0.305968	0.489488	0.454254	0.350061	0.820452	0.850748	0.802807	0.811024	0.663443	0.66278	0.618359	0.662398	0.653956	0.655806	1.00886	0.633052	0.754262	0.758272	0.751181	0.807733	0.725509
12	5	Male	1741.7	Small	0.122584	0.13071	0.118157	0.218212	0.229043	0.198192	0.168469	0.19973	0.160338	0.197221	0.380926	0.501654	0.311967	0.26232	0.240297	0.133657	0.191541	0.237293	0.2744	0.243629	0.20626	0.435098	0.414482	0.378471	0.285426	0.477811	0.432331	0.355751	0.840194	0.869563	0.819042	0.831172	0.665992	0.660545	0.652881	0.682337	0.648505	0.663866	0.849335	0.605465	0.743822	0.736225	0.736152	0.811533	0.721113
12	6	Male	1758	Small	0.13342	0.138367	0.135108	0.2286	0.232972	0.205786	0.230604	0.238701	0.223419	0.22142	0.348139	0.501376	0.336007	0.308359	0.274887	0.142303	0.209161	0.22942	0.263411	0.276219	0.22064	0.41916	0.397855	0.313213	0.307913	0.476151	0.458081	0.329542	0.854257	0.889444	0.83862	0.85231	0.675974	0.673273	0.663966	0.707543	0.670188	0.663776	0.988677	0.6392	0.776262	0.753458	0.785509	0.855606	0.758777
13	1	Male	1744.5	Small	0.15319	0.15639	0.175307	0.217934	0.198709	0.201381	0.20801	0.220576	0.219171	0.210723	0.383944	0.467464	0.293075	0.237567	0.232822	0.135757	0.201526	0.241481	0.239152	0.215618	0.232798	0.42518	0.388518	0.297206	0.310107	0.447752	0.412603	0.317854	0.854655	0.865267	0.817013	0.841543	0.669667	0.680183	0.680854	0.70301	0.688058	0.666337	0.826073	0.585381	0.750457	0.754274	0.761392	0.81695	0.746741
13	2	Male	1731.3	Small	0.151336	0.15583	0.135417	0.224769	0.223768	0.187209	0.184329	0.216061	0.190015	0.219952	0.369199	0.469216	0.334986	0.254925	0.253782	0.129749	0.203856	0.260279	0.271272	0.230221	0.201853	0.392641	0.35371	0.263118	0.346019	0.465477	0.440404	0.323623	0.843027	0.861186	0.805528	0.821548	0.658768	0.669222	0.675546	0.707206	0.691164	0.644656	0.878936	0.58949	0.728468	0.740471	0.750778	0.800265	0.715024
13	3	Male	1734	Small	0.184915	0.193799	0.18466	0.210125	0.238304	0.224054	0.219374	0.218876	0.234633	0.237524	0.332337	0.470184	0.315677	0.274938	0.232909	0.141693	0.186727	0.230333	0.278665	0.249689	0.232473	0.418538	0.345352	0.223371	0.292608	0.466451	0.436803	0.30923	0.866362	0.902966	0.852087	0.82352	0.650561	0.690326	0.679028	0.715051	0.677256	0.663285	0.952492	0.563102	0.739119	0.76264	0.774835	0.831386	0.752712
13	4	Male	1734.2	Small	0.166348	0.144079	0.154053	0.206862	0.236596	0.229275	0.19538	0.230894	0.240344	0.230009	0.354825	0.511678	0.31828	0.237041	0.266406	0.162775	0.187727	0.287119	0.286344	0.230049	0.213692	0.441284	0.380962	0.262876	0.310356	0.491469	0.478172	0.311072	0.906296	0.939132	0.879577	0.882547	0.708134	0.7174	0.684187	0.725972	0.670378	0.683269	1.01876	0.65023	0.81539	0.801463	0.812212	0.870377	0.792617
13	5	Male	1731.3	Small	0.178496	0.148327	0.146753	0.171828	0.207427	0.197718	0.198216	0.222664	0.199778	0.193121	0.365452	0.468147	0.29903	0.253091	0.243842	0.157584	0.206644	0.259832	0.297671	0.22272	0.213966	0.428193	0.372068	0.320904	0.299506	0.466799	0.415184	0.336136	0.90775	0.920225	0.875866	0.857482	0.702347	0.697021	0.676615	0.711523	0.685569	0.69828	0.951887	0.68929	0.789891	0.780213	0.776165	0.84004	0.788508
13	6	Male	1744.5	Small	0.157342	0.147979	0.150431	0.223881	0.240134	0.216684	0.22441	0.233252	0.258822	0.226537	0.366378	0.516771	0.341388	0.287406	0.249869	0.171296	0.207266	0.256851	0.275105	0.239197	0.237235	0.411786	0.377732	0.262827	0.335562	0.465501	0.442731	0.334514	0.830191	0.854956	0.823151	0.847682	0.672886	0.661913	0.661014	0.684945	0.662904	0.661786	0.864821	0.61739	0.768687	0.756119	0.784742	0.797536	0.755895
14	1	Female	1889.06	Large	0.142431	0.160237	0.105051	0.21074	0.194072	0.192039	0.16468	0.207389	0.209947	0.186538	0.394437	0.543805	0.306237	0.249863	0.212425	0.121636	0.199048	0.232648	0.261816	0.218811	0.201029	0.505595	0.405991	0.359606	0.32069	0.481246	0.457196	0.366213	0.823451	0.838352	0.807164	0.821636	0.721702	0.715705	0.692042	0.709347	0.705263	0.705128	0.869411	0.693282	0.787851	0.763781	0.762298	0.803971	0.759495
14	2	Female	1911.4	Large	0.150001	0.177136	0.110706	0.214711	0.209101	0.205548	0.192279	0.224197	0.233424	0.221708	0.379728	0.533554	0.321502	0.264944	0.257859	0.144802	0.222455	0.231312	0.286982	0.237472	0.21242	0.451055	0.385505	0.333833	0.364408	0.489359	0.461445	0.377814	0.824454	0.845205	0.804622	0.811701	0.666848	0.66252	0.674225	0.696494	0.66735	0.656703	0.831843	0.632532	0.744639	0.751948	0.742177	0.805108	0.72388
14	3	Female	1893.85	Large	0.150181	0.166468	0.107893	0.206674	0.231515	0.229335	0.19724	0.227131	0.211583	0.232864	0.375426	0.542588	0.323224	0.266793	0.23577	0.158406	0.234523	0.248177	0.288375	0.243911	0.209943	0.454813	0.400064	0.33371	0.337474	0.506282	0.479201	0.368073	0.836204	0.848747	0.816715	0.824436	0.671042	0.67612	0.661928	0.686653	0.643969	0.668056	0.888557	0.624592	0.748549	0.760694	0.76311	0.823793	0.750627
14	4	Female	1915.88	Large	0.149758	0.143578	0.110391	0.241939	0.21695	0.226585	0.168217	0.224323	0.213849	0.227807	0.397817	0.541998	0.325807	0.278891	0.223284	0.148771	0.223267	0.252702	0.303048	0.257492	0.221816	0.487922	0.423496	0.365798	0.340322	0.510703	0.499096	0.389287	0.817471	0.838173	0.804368	0.79637	0.712019	0.7141	0.675991	0.714536	0.69498	0.715621	0.823802	0.711906	0.776593	0.778434	0.770865	0.823801	0.744041
14	5	Female	1913.93	Large	0.153552	0.141573	0.112247	0.223776	0.214938	0.202297	0.190901	0.215297	0.211812	0.20887	0.405406	0.54427	0.312076	0.248949	0.241188	0.11338	0.202316	0.24336	0.304033	0.242007	0.209364	0.490084	0.435591	0.350257	0.374172	0.502419	0.483456	0.405221	0.79682	0.816098	0.790811	0.801802	0.689986	0.704494	0.688513	0.711413	0.667199	0.692577	0.878657	0.697812	0.779697	0.754057	0.7528	0.789574	0.729676
14	6	Female	1905.85	Large	0.176343	0.205083	0.149638	0.211036	0.245284	0.218222	0.24682	0.25105	0.259665	0.262378	0.381219	0.532751	0.357767	0.299777	0.260475	0.184572	0.188671	0.256093	0.311704	0.271155	0.239996	0.504529	0.392431	0.326983	0.288099	0.476829	0.445501	0.381792	0.899524	0.929654	0.884874	0.867977	0.699991	0.728295	0.688425	0.719788	0.689765	0.712629	0.856801	0.636005	0.788676	0.815921	0.818316	0.881752	0.794383
15	1	Female	1716.04	Small	0.127612	0.122869	0.12809	0.217562	0.168433	0.195074	0.15425	0.197279	0.137293	0.185736	0.37718	0.474087	0.270774	0.240623	0.226196	0.130626	0.213817	0.231422	0.246784	0.212111	0.200594	0.450186	0.39119	0.383621	0.328975	0.474257	0.453409	0.336259	0.841062	0.867847	0.81198	0.802307	0.749582	0.700052	0.722982	0.730974	0.710751	0.71075	0.862102	0.734045	0.78868	0.735657	0.755517	0.824536	0.764459
15	2	Female	1731.33	Small	0.112493	0.124093	0.11941	0.202957	0.204482	0.196254	0.174558	0.203551	0.212436	0.164827	0.374895	0.4773	0.295066	0.252048	0.230872	0.124049	0.198655	0.232511	0.292402	0.211479	0.198402	0.470057	0.397701	0.347418	0.278333	0.491459	0.475935	0.333531	0.800963	0.850482	0.781597	0.767286	0.666903	0.657075	0.675041	0.692693	0.686093	0.67359	0.936392	0.674666	0.721826	0.732663	0.726187	0.804496	0.680631
15	3	Female	1712.76	Small	0.127637	0.126216	0.146438	0.225514	0.197208	0.202578	0.197343	0.205183	0.201349	0.197595	0.387159	0.502553	0.311792	0.271259	0.200921	0.14757	0.211151	0.235379	0.292488	0.229428	0.20974	0.458356	0.388429	0.390495	0.281293	0.512778	0.498494	0.336629	0.834617	0.849668	0.816778	0.7857	0.662956	0.65372	0.661657	0.689365	0.659577	0.642585	0.813942	0.634642	0.730855	0.717444	0.721683	0.788484	0.72173
15	4	Female	1694.36	Small	0.129427	0.134433	0.13647	0.234366	0.202965	0.217619	0.196136	0.215889	0.168462	0.184993	0.393422	0.538428	0.311276	0.257581	0.223505	0.16156	0.212055	0.250611	0.275509	0.230438	0.199394	0.49571	0.445612	0.404947	0.299338	0.511259	0.507808	0.360807	0.854895	0.883333	0.829712	0.814295	0.711828	0.719615	0.697351	0.724362	0.725471	0.693395	0.858639	0.732333	0.788343	0.764517	0.767391	0.825373	0.741073
15	5	Female	1694.15	Small	0.126937	0.138171	0.133557	0.22279	0.239736	0.243768	0.206731	0.207627	0.236176	0.17769	0.417619	0.524687	0.286787	0.248823	0.241314	0.135869	0.197918	0.242881	0.366282	0.218249	0.212511	0.504312	0.481897	0.470689	0.332572	0.51116	0.494726	0.386348	0.89292	0.92708	0.886341	0.837696	0.752093	0.753224	0.734543	0.754857	0.744618	0.711628	0.805635	0.751544	0.807645	0.791977	0.822621	0.835219	0.813715
15	6	Female	1682.18	Small	0.133388	0.117629	0.141007	0.21651	0.190551	0.195445	0.216344	0.213072	0.224202	0.181816	0.374547	0.514511	0.305323	0.271295	0.248859	0.14232	0.200292	0.236495	0.294148	0.230005	0.19554	0.487068	0.417721	0.396004	0.331671	0.498266	0.476499	0.350421	0.864079	0.877258	0.828509	0.835277	0.690263	0.694138	0.690595	0.70581	0.679264	0.692376	0.911182	0.700366	0.792114	0.774506	0.773308	0.848185	0.743882
16	1	Female	1735.5	Small	0.141572	0.170152	0.134638	0.192992	0.167912	0.16784	0.14688	0.166253	0.167477	0.12765	0.396671	0.459602	0.279966	0.215234	0.232204	0.122347	0.190898	0.205627	0.250164	0.199926	0.211941	0.443179	0.39816	0.327733	0.34156	0.458174	0.42604	0.372586	0.844312	0.863168	0.801793	0.768564	0.714602	0.71406	0.705193	0.718196	0.685021	0.709637	0.797966	0.705393	0.768244	0.768937	0.758165	0.829719	0.755188
16	2	Female	1734.15	Small	0.128299	0.14246	0.123451	0.206826	0.184064	0.173968	0.181342	0.16955	0.186017	0.189991	0.35823	0.501425	0.315364	0.2776	0.25338	0.106574	0.193032	0.17839	0.260122	0.204032	0.19839	0.452471	0.39363	0.355397	0.316661	0.483665	0.444964	0.362629	0.826814	0.839397	0.799083	0.802527	0.681623	0.671538	0.676045	0.702187	0.670185	0.684458	0.767605	0.648151	0.766136	0.753811	0.768617	0.790129	0.706349
16	3	Female	1743.03	Small	0.12427	0.146141	0.102322	0.192479	0.190602	0.187856	0.172894	0.198163	0.20765	0.182975	0.394594	0.499495	0.295933	0.29303	0.232288	0.118611	0.202862	0.208957	0.28493	0.19692	0.202327	0.470382	0.426897	0.354657	0.354719	0.491689	0.464447	0.375511	0.808309	0.81989	0.792303	0.797662	0.687666	0.687089	0.666686	0.697634	0.679016	0.676674	0.798281	0.69714	0.761347	0.727918	0.749341	0.773933	0.739897
16	4	Female	1739.23	Small	0.109865	0.145481	0.11254	0.214342	0.197336	0.194444	0.173233	0.183612	0.208652	0.190966	0.418756	0.525198	0.303067	0.277352	0.25427	0.124454	0.225491	0.220056	0.27605	0.215007	0.230674	0.480165	0.442657	0.383176	0.319549	0.503063	0.474809	0.385692	0.806267	0.835445	0.77573	0.778027	0.672945	0.693129	0.688332	0.703471	0.678566	0.690333	0.774969	0.675642	0.756776	0.758921	0.752465	0.780118	0.729417
16	5	Female	1720.53	Small	0.117892	0.135993	0.100301	0.173335	0.175247	0.184474	0.168685	0.18113	0.181158	0.14057	0.399492	0.514324	0.300631	0.277024	0.238849	0.103482	0.196458	0.231092	0.28577	0.199929	0.228291	0.494598	0.437588	0.336514	0.298228	0.501508	0.467257	0.479105	0.808461	0.824267	0.776506	0.783361	0.696266	0.684322	0.692133	0.699421	0.679318	0.693209	0.812345	0.684213	0.767323	0.740895	0.732969	0.777902	0.746778
16	6	Female	1749.24	Small	0.150409	0.170194	0.124463	0.222217	0.2105	0.176271	0.171087	0.202664	0.202802	0.214232	0.375887	0.513406	0.327575	0.287812	0.256592	0.122067	0.200438	0.207141	0.281243	0.219352	0.226873	0.447901	0.391366	0.30688	0.300153	0.484088	0.442884	0.369782	0.847852	0.869594	0.818231	0.836374	0.700866	0.700901	0.689826	0.704318	0.712203	0.693137	0.900746	0.674097	0.762652	0.771479	0.7783	0.834562	0.753779
17	1	Female	1763.32	Small	0.140088	0.141631	0.124565	0.221257	0.17293	0.183775	0.182742	0.213965	0.186965	0.185395	0.358292	0.514413	0.318016	0.259953	0.272209	0.130042	0.226065	0.252433	0.258276	0.250673	0.248819	0.451286	0.383385	0.299163	0.258124	0.46909	0.42667	0.367643	0.870999	0.885382	0.849827	0.821324	0.699358	0.69544	0.69268	0.711106	0.695896	0.677732	0.896946	0.68556	0.759819	0.738206	0.73948	0.824355	0.766086
17	2	Female	1803.66	Small	0.141016	0.156529	0.128778	0.246902	0.199159	0.18844	0.186983	0.206422	0.207428	0.230279	0.41311	0.498336	0.328255	0.269416	0.267344	0.170838	0.204217	0.230458	0.270224	0.255046	0.223056	0.421523	0.447488	0.37674	0.319071	0.477995	0.436321	0.356615	0.869426	0.886725	0.833289	0.83776	0.685085	0.692645	0.702423	0.724101	0.692145	0.693331	0.739234	0.639083	0.756851	0.770835	0.774164	0.815865	0.758397
17	3	Female	1820.24	Small	0.129592	0.13006	0.111388	0.225434	0.210949	0.211251	0.189191	0.222785	0.210322	0.223329	0.385661	0.524231	0.326443	0.280447	0.261686	0.16207	0.233341	0.241818	0.287962	0.251519	0.209911	0.438851	0.404354	0.362768	0.270742	0.487605	0.453376	0.359248	0.871483	0.887613	0.827954	0.844148	0.681679	0.70793	0.666321	0.712099	0.649875	0.687575	0.895773	0.649887	0.791599	0.784365	0.786825	0.833454	0.767447
17	4	Female	1795.84	Small	0.136485	0.143545	0.122351	0.253152	0.212215	0.211656	0.211243	0.224612	0.223697	0.23574	0.439852	0.562278	0.333532	0.292648	0.273769	0.192372	0.231227	0.267042	0.267962	0.261012	0.222556	0.478508	0.468848	0.396524	0.357545	0.508424	0.5009	0.377066	0.850657	0.861908	0.828531	0.828407	0.697642	0.691128	0.679151	0.71746	0.697467	0.698387	0.755879	0.684831	0.789159	0.780136	0.784694	0.806104	0.766268
17	6	Female	1788.42	Small	0.155386	0.169591	0.127155	0.245037	0.224581	0.211174	0.195456	0.222574	0.220762	0.23967	0.330375	0.479514	0.344188	0.264742	0.280198	0.196203	0.210493	0.265088	0.239011	0.250014	0.219666	0.451744	0.384086	0.306909	0.284583	0.482126	0.459901	0.341912	0.868742	0.909659	0.861861	0.831374	0.669443	0.668781	0.691031	0.726873	0.703958	0.666622	0.99737	0.650025	0.754152	0.755625	0.783179	0.825121	0.747597
18	1	Female	1590.88	Small	0.1258	0.14273	0.122496	0.21253	0.179528	0.181661	0.164792	0.177422	0.172552	0.168264	0.400409	0.46552	0.288388	0.251447	0.222659	0.121904	0.209557	0.227584	0.259971	0.209103	0.191757	0.426965	0.361214	0.330413	0.27137	0.443336	0.42711	0.349273	0.7946	0.809223	0.775503	0.779656	0.662837	0.6726	0.670843	0.679734	0.667274	0.679443	0.88258	0.644258	0.741576	0.716762	0.716394	0.780196	0.701491
18	2	Female	1602.99	Small	0.113603	0.152787	0.133411	0.237293	0.187871	0.193241	0.175068	0.227074	0.18841	0.182709	0.366549	0.444215	0.305687	0.28385	0.25984	0.152172	0.228943	0.279816	0.282281	0.201078	0.227656	0.430032	0.391412	0.343762	0.344596	0.485707	0.418281	0.362602	0.849854	0.872177	0.824396	0.813072	0.660444	0.682243	0.620741	0.662011	0.616418	0.64918	0.882569	0.611557	0.753308	0.734554	0.764425	0.809978	0.749118
18	3	Female	1597.51	Small	0.105128	0.135537	0.128412	0.242839	0.202545	0.208534	0.167108	0.204618	0.164207	0.189397	0.353756	0.468587	0.317525	0.280253	0.230712	0.118702	0.215942	0.232887	0.260564	0.209451	0.205434	0.43447	0.383133	0.324079	0.311861	0.46011	0.432184	0.346768	0.82266	0.856915	0.81199	0.822116	0.637286	0.64119	0.637395	0.667353	0.647686	0.643928	0.949916	0.643508	0.739253	0.736246	0.759585	0.793448	0.73496
18	4	Female	1591.26	Small	0.0920608	0.140775	0.113648	0.19883	0.180283	0.187515	0.142779	0.196794	0.17457	0.194446	0.389571	0.474267	0.312009	0.251696	0.249196	0.133426	0.208575	0.244276	0.281626	0.216338	0.222554	0.418375	0.398912	0.346381	0.269692	0.462308	0.426062	0.379412	0.790425	0.820461	0.780323	0.791356	0.716036	0.723878	0.662303	0.712388	0.662205	0.675648	0.879671	0.740685	0.769226	0.776655	0.784597	0.801212	0.733721
18	5	Female	1603.09	Small	0.101323	0.134576	0.12187	0.228798	0.215327	0.218854	0.179485	0.222692	0.206415	0.194052	0.396915	0.520904	0.342045	0.285938	0.279415	0.14214	0.239214	0.256668	0.29816	0.218021	0.230287	0.45578	0.383448	0.339424	0.333865	0.463205	0.462002	0.383325	0.790114	0.830739	0.770602	0.812042	0.676639	0.68412	0.671716	0.696212	0.657016	0.670169	0.919406	0.700183	0.767365	0.754221	0.759489	0.800017	0.710189
18	6	Female	1585.02	Small	0.121182	0.140181	0.137193	0.244918	0.256171	0.219012	0.234415	0.247204	0.236923	0.174731	0.376471	0.511259	0.335936	0.29433	0.272651	0.153803	0.217584	0.241519	0.303843	0.253515	0.246203	0.42022	0.392908	0.307762	0.349281	0.469488	0.513997	0.380848	0.82916	0.839806	0.817296	0.792173	0.648438	0.651084	0.620844	0.646185	0.630148	0.649925	0.90656	0.650011	0.75108	0.743807	0.760521	0.807093	0.743231
19	1	Female	1829.28	Large	0.1563	0.154973	0.147891	0.235579	0.185585	0.184421	0.158161	0.21064	0.182973	0.199979	0.377787	0.499202	0.300492	0.24362	0.246618	0.129153	0.211032	0.244046	0.307904	0.231914	0.221569	0.4219	0.411404	0.332532	0.380828	0.453195	0.438459	0.370795	0.84332	0.858049	0.807489	0.808734	0.709913	0.702463	0.696174	0.719257	0.684764	0.691785	0.871179	0.683201	0.764329	0.740754	0.741866	0.794557	0.744302
19	2	Female	1849.5	Large	0.135812	0.153274	0.127096	0.232682	0.204084	0.214052	0.168717	0.222906	0.2095	0.220073	0.384431	0.490584	0.30667	0.299848	0.253545	0.14953	0.210315	0.265449	0.313218	0.222048	0.211124	0.431673	0.420648	0.361939	0.337611	0.478025	0.4649	0.36554	0.83255	0.846804	0.819716	0.809378	0.662149	0.680563	0.670334	0.693202	0.652173	0.676122	0.874851	0.666219	0.742079	0.754479	0.773894	0.799154	0.733326
19	3	Female	1849.01	Large	0.141223	0.143583	0.135467	0.221655	0.215776	0.222934	0.193426	0.220153	0.220546	0.220192	0.414659	0.511939	0.314639	0.270802	0.220061	0.134813	0.22982	0.261492	0.335966	0.236953	0.224876	0.459692	0.417735	0.34992	0.349325	0.484433	0.480617	0.372603	0.831117	0.862449	0.825189	0.825358	0.689077	0.696065	0.670366	0.732697	0.641225	0.673723	0.828483	0.66773	0.775982	0.768371	0.767537	0.825861	0.741335
19	4	Female	1848.94	Large	0.135522	0.146603	0.143746	0.233472	0.210396	0.229389	0.180924	0.235757	0.175635	0.240264	0.389394	0.501482	0.316656	0.289442	0.255428	0.147961	0.222475	0.28166	0.343948	0.23189	0.222906	0.449597	0.406039	0.330582	0.373873	0.482578	0.46617	0.383321	0.843791	0.845866	0.822981	0.812863	0.693079	0.696388	0.677615	0.712299	0.679682	0.688264	0.902176	0.736397	0.774816	0.760729	0.766975	0.811811	0.748103
19	5	Female	1849.15	Large	0.133334	0.133608	0.126285	0.235898	0.18025	0.2341	0.171698	0.219331	0.174976	0.186084	0.413705	0.518486	0.296658	0.267201	0.252046	0.116041	0.203275	0.277082	0.314956	0.225879	0.248339	0.482281	0.435095	0.37227	0.376327	0.473505	0.474166	0.472395	0.801964	0.815451	0.803851	0.798147	0.713429	0.712855	0.70185	0.728248	0.69785	0.6993	0.86071	0.735384	0.779439	0.773942	0.758746	0.779281	0.730101
19	6	Female	1835.9	Large	0.146959	0.158261	0.136749	0.236611	0.226098	0.202101	0.169351	0.212701	0.207127	0.237576	0.36351	0.534544	0.332547	0.278813	0.257154	0.141095	0.167217	0.278775	0.301723	0.234589	0.220244	0.45293	0.390139	0.352945	0.363547	0.461127	0.447147	0.377557	0.87307	0.869051	0.861228	0.850902	0.704465	0.722637	0.681228	0.718731	0.680644	0.708139	0.970554	0.690767	0.80303	0.790005	0.790934	0.830001	0.771331
20	1	Female	1859.92	Large	0.147588	0.173201	0.147658	0.231987	0.189493	0.172868	0.149481	0.205718	0.184372	0.212163	0.431498	0.50031	0.296477	0.263527	0.260806	0.1348	0.186789	0.241855	0.240074	0.218525	0.203214	0.452909	0.396547	0.377032	0.260673	0.463494	0.413924	0.359728	0.811283	0.851614	0.787306	0.786783	0.693513	0.691653	0.676104	0.693935	0.689471	0.682359	0.717882	0.674006	0.731938	0.733326	0.750622	0.793542	0.727733
20	2	Female	1879.05	Large	0.15039	0.179729	0.149394	0.21147	0.190682	0.198223	0.163595	0.202721	0.193469	0.219606	0.376105	0.516682	0.326708	0.288766	0.268008	0.149415	0.181165	0.227962	0.254012	0.252516	0.20211	0.486881	0.390219	0.338557	0.355117	0.492074	0.483085	0.366357	0.828925	0.839258	0.817372	0.803982	0.693967	0.681587	0.693809	0.698641	0.685702	0.686764	0.874482	0.713594	0.775943	0.758615	0.759663	0.791277	0.749355
20	3	Female	1906.06	Large	0.159896	0.17083	0.129351	0.218607	0.200192	0.191313	0.183951	0.195186	0.200496	0.19451	0.395854	0.496646	0.332184	0.276849	0.255544	0.136599	0.192756	0.248606	0.278174	0.250704	0.212598	0.474275	0.423811	0.391995	0.288621	0.485799	0.458702	0.385716	0.847556	0.865616	0.819654	0.822875	0.664627	0.675069	0.667104	0.704081	0.656793	0.690358	0.751312	0.626974	0.744082	0.763399	0.763671	0.803551	0.741978
20	4	Female	1855.68	Large	0.129851	0.161126	0.146913	0.233283	0.187817	0.193636	0.167659	0.211977	0.186844	0.215775	0.415511	0.519741	0.319934	0.27972	0.263554	0.139774	0.216705	0.264044	0.25223	0.253181	0.217073	0.464067	0.418364	0.336989	0.31606	0.481515	0.485718	0.427368	0.843167	0.863926	0.824918	0.778068	0.689257	0.704721	0.696272	0.713299	0.694481	0.713828	0.768558	0.6982	0.749587	0.768441	0.768411	0.814874	0.756843
20	5	Female	1889.02	Large	0.143552	0.158264	0.130782	0.220699	0.192446	0.205142	0.170092	0.207585	0.183228	0.191135	0.407976	0.523772	0.329151	0.294783	0.267806	0.155117	0.215334	0.271894	0.24796	0.242607	0.227371	0.492351	0.405455	0.346675	0.363967	0.492481	0.493013	0.391033	0.845401	0.870557	0.834479	0.821263	0.701453	0.695206	0.682683	0.709554	0.688387	0.703122	0.856414	0.718337	0.780329	0.770451	0.764814	0.831181	0.763479
20	6	Female	1869	Large	0.164742	0.182598	0.152694	0.247317	0.193227	0.190782	0.169172	0.216934	0.212749	0.198338	0.387729	0.532866	0.324402	0.277371	0.281181	0.167733	0.212514	0.235033	0.271052	0.253921	0.226547	0.478435	0.405964	0.335605	0.314498	0.489657	0.476639	0.375217	0.853413	0.860977	0.829697	0.824019	0.710035	0.700045	0.691728	0.708674	0.69546	0.71026	0.836765	0.710952	0.794902	0.778348	0.78124	0.812356	0.769845
21	1	Female	1799.61	Large	0.122406	0.139291	0.113779	0.205732	0.152427	0.151753	0.145984	0.167463	0.137757	0.147606	0.363451	0.451114	0.280688	0.230865	0.242825	0.0979512	0.201217	0.224664	0.294946	0.197465	0.196058	0.439043	0.383687	0.35798	0.316243	0.471042	0.444738	0.358981	0.885698	0.938729	0.825876	0.823309	0.725139	0.712607	0.705779	0.738666	0.722595	0.702928	0.813123	0.699583	0.769577	0.764965	0.761947	0.87641	0.774073
21	2	Female	1815.94	Large	0.118262	0.121929	0.113832	0.180079	0.191448	0.198174	0.170976	0.179014	0.19791	0.162933	0.430512	0.476303	0.291182	0.261116	0.206128	0.0979917	0.215029	0.217729	0.297986	0.212231	0.196479	0.438565	0.450144	0.451498	0.391615	0.504955	0.486471	0.379292	0.83167	0.830913	0.809311	0.83107	0.696225	0.70025	0.672787	0.699526	0.662164	0.671795	0.769424	0.648071	0.786656	0.780289	0.780445	0.796268	0.750943
21	3	Female	1830.13	Large	0.125138	0.128619	0.113722	0.211804	0.181879	0.1908	0.162885	0.204209	0.183748	0.164919	0.417537	0.505459	0.300213	0.258565	0.239279	0.10599	0.248424	0.227608	0.289774	0.210521	0.221767	0.444308	0.432852	0.409104	0.31115	0.507657	0.473291	0.374173	0.820795	0.843765	0.79711	0.811066	0.682367	0.682007	0.654077	0.692472	0.682679	0.699447	0.770459	0.661467	0.767894	0.756825	0.755769	0.798696	0.741837
21	4	Female	1827.93	Large	0.109032	0.115004	0.113614	0.220314	0.198089	0.206594	0.198234	0.19709	0.197755	0.163497	0.403218	0.501604	0.304554	0.276971	0.222267	0.10815	0.216279	0.234684	0.315491	0.22049	0.220653	0.483671	0.458463	0.417859	0.350118	0.515524	0.476005	0.384736	0.839431	0.863554	0.819689	0.804506	0.715531	0.716002	0.691548	0.729505	0.68779	0.717898	0.764374	0.710448	0.788321	0.784309	0.766931	0.81485	0.753418
21	5	Female	1818.26	Large	0.111757	0.125146	0.106883	0.238438	0.184906	0.202952	0.188461	0.194442	0.170896	0.186376	0.418524	0.507436	0.299057	0.260378	0.238304	0.112171	0.226968	0.251286	0.290842	0.224779	0.251437	0.469405	0.466843	0.45094	0.37984	0.508456	0.496036	0.404597	0.835044	0.855991	0.814918	0.824941	0.706449	0.693805	0.683281	0.712804	0.707081	0.704587	0.77974	0.708566	0.798112	0.78775	0.80071	0.810396	0.7644
21	6	Female	1799.28	Large	0.157935	0.151896	0.137878	0.233958	0.211447	0.194204	0.197357	0.19882	0.185769	0.190198	0.400218	0.487681	0.327481	0.276947	0.234307	0.109319	0.228258	0.22718	0.290029	0.240624	0.210802	0.456511	0.406791	0.402234	0.381227	0.480898	0.470115	0.370938	0.861487	0.870815	0.824436	0.819718	0.673891	0.687827	0.672477	0.711744	0.690341	0.668059	0.79384	0.630113	0.764432	0.756701	0.775301	0.822767	0.727742
22	1	Female	1570.45	Small	0.143784	0.153445	0.124917	0.248635	0.161805	0.174223	0.163423	0.204148	0.206531	0.175483	0.363144	0.461982	0.276386	0.259433	0.232906	0.117243	0.208705	0.233195	0.29109	0.209602	0.187617	0.432989	0.369389	0.30196	0.331561	0.458286	0.436295	0.330281	0.786143	0.80539	0.763854	0.755998	0.673794	0.68235	0.684531	0.69664	0.69898	0.657734	0.797839	0.635063	0.72502	0.715008	0.702957	0.783978	0.728292
22	2	Female	1623.69	Small	0.124257	0.11995	0.107337	0.224956	0.194084	0.202011	0.178803	0.213586	0.189196	0.212094	0.37763	0.482175	0.320872	0.245756	0.234303	0.119461	0.20236	0.238006	0.304671	0.222244	0.199808	0.455688	0.431437	0.37976	0.319232	0.494429	0.457191	0.355102	0.808095	0.807268	0.782217	0.807962	0.677558	0.649324	0.658342	0.659796	0.667104	0.649512	0.739717	0.635344	0.759673	0.735521	0.75934	0.786351	0.730342
22	3	Female	1613.74	Small	0.137358	0.142551	0.109526	0.23478	0.212282	0.216623	0.199734	0.214174	0.186365	0.221316	0.364983	0.474948	0.332608	0.290924	0.245869	0.128599	0.230255	0.253404	0.2923	0.206393	0.194992	0.441754	0.393839	0.350255	0.301258	0.485285	0.465478	0.347924	0.830947	0.857714	0.808476	0.815611	0.665456	0.673682	0.663711	0.690788	0.687979	0.666998	0.847605	0.661992	0.769114	0.750234	0.771768	0.815901	0.738064
22	4	Female	1619.78	Small	0.117643	0.147877	0.108338	0.239869	0.204044	0.190807	0.182239	0.216104	0.185786	0.210513	0.395191	0.48073	0.305771	0.27931	0.253997	0.117826	0.228564	0.245127	0.316535	0.224634	0.180656	0.467673	0.424386	0.337646	0.341863	0.508499	0.457169	0.366917	0.797208	0.809493	0.782665	0.788701	0.681087	0.694017	0.676908	0.707356	0.69621	0.694567	0.791229	0.714764	0.762137	0.750868	0.755979	0.776535	0.713358
22	5	Female	1611.42	Small	0.105875	0.125476	0.0920952	0.234863	0.177432	0.185698	0.145406	0.18838	0.172581	0.170655	0.415771	0.473446	0.304331	0.266108	0.23042	0.102119	0.230882	0.229121	0.288474	0.206782	0.219967	0.459467	0.42169	0.358742	0.31521	0.496159	0.48206	0.378193	0.799259	0.808462	0.783046	0.812342	0.698329	0.687792	0.67074	0.699535	0.700207	0.695603	0.825089	0.705799	0.77957	0.756277	0.761966	0.775522	0.734371
22	6	Female	1592.69	Small	0.141578	0.163411	0.134657	0.237511	0.205632	0.213737	0.201179	0.224449	0.197456	0.213095	0.375374	0.471443	0.329731	0.303975	0.276482	0.140629	0.231484	0.254336	0.29893	0.218573	0.215256	0.447349	0.380126	0.318175	0.310374	0.485165	0.475306	0.360352	0.83939	0.857292	0.829096	0.816477	0.687699	0.70343	0.674003	0.701888	0.704888	0.692235	0.866618	0.68718	0.793789	0.775095	0.768893	0.828125	0.751004
23	1	Female	1587.82	Small	0.14367	0.158454	0.156909	0.216427	0.156849	0.160304	0.17921	0.217235	0.185167	0.178789	0.340971	0.432806	0.267233	0.241649	0.236431	0.117813	0.141036	0.228116	0.255187	0.185704	0.198376	0.413776	0.343459	0.318309	0.257309	0.407367	0.394625	0.329079	0.820124	0.874948	0.819833	0.790569	0.727042	0.70494	0.686598	0.710128	0.703479	0.703262	0.835566	0.704639	0.790689	0.74467	0.758459	0.795268	0.780213
23	2	Female	1631.58	Small	0.132083	0.128666	0.123057	0.176735	0.191628	0.2058	0.216046	0.215251	0.212343	0.2331	0.360185	0.450626	0.30866	0.262876	0.261923	0.141604	0.217521	0.227454	0.242932	0.205685	0.201618	0.411177	0.364028	0.303753	0.281186	0.482362	0.482732	0.359948	0.81833	0.842611	0.813622	0.800156	0.649409	0.663953	0.634291	0.663883	0.653236	0.651914	0.928225	0.673096	0.749976	0.763743	0.753531	0.804581	0.72652
23	3	Female	1631.64	Small	0.137918	0.141161	0.120814	0.190052	0.200025	0.215805	0.182575	0.218301	0.190845	0.211766	0.318145	0.500378	0.329756	0.279722	0.216586	0.127809	0.191081	0.243119	0.286974	0.202811	0.18992	0.426134	0.340764	0.26342	0.276957	0.474738	0.471056	0.336848	0.836874	0.860246	0.818367	0.828445	0.698722	0.693228	0.685903	0.701656	0.703375	0.691799	1.1323	0.707104	0.777955	0.762901	0.803762	0.820746	0.745734
23	4	Female	1625.23	Small	0.131971	0.137242	0.125493	0.195724	0.19114	0.200394	0.194843	0.217658	0.17466	0.181075	0.37245	0.526928	0.321576	0.262866	0.247144	0.136732	0.230315	0.242194	0.299025	0.191215	0.210154	0.448734	0.41182	0.351619	0.339618	0.493294	0.500189	0.361021	0.822075	0.849392	0.793884	0.812107	0.673681	0.67832	0.668765	0.685879	0.688254	0.701103	0.912507	0.703501	0.741296	0.773894	0.76405	0.799511	0.707306
23	5	Female	1631.19	Small	0.127712	0.150091	0.125104	0.228105	0.20428	0.21209	0.186985	0.217844	0.16639	0.18982	0.380677	0.485978	0.328372	0.274169	0.266082	0.128929	0.212735	0.237747	0.287317	0.195549	0.240943	0.458906	0.404833	0.334392	0.313602	0.481037	0.461506	0.386553	0.819353	0.825926	0.791726	0.795994	0.664197	0.685748	0.66551	0.688027	0.664264	0.668183	0.886393	0.722459	0.767073	0.767885	0.768012	0.807351	0.731837
23	6	Female	1594.42	Small	0.129048	0.139043	0.136942	0.217933	0.188691	0.190813	0.199071	0.231934	0.17315	0.205976	0.369658	0.497764	0.316729	0.269732	0.264809	0.120022	0.203133	0.225562	0.265999	0.207097	0.228935	0.449179	0.397265	0.330302	0.346722	0.474087	0.47771	0.350898	0.838198	0.84986	0.816271	0.843927	0.706337	0.709566	0.684212	0.707885	0.721969	0.682271	0.967629	0.734784	0.811953	0.807541	0.809805	0.820799	0.760302
24	1	Female	1883.57	Large	0.11282	0.134683	0.112804	0.219871	0.180171	0.175696	0.165263	0.208871	0.193424	0.190465	0.352535	0.478297	0.295592	0.242787	0.235917	0.109458	0.173565	0.251196	0.28083	0.210553	0.212559	0.450936	0.36899	0.342789	0.25677	0.440136	0.411448	0.342894	0.84139	0.836891	0.816805	0.842309	0.696241	0.694833	0.679799	0.693823	0.683707	0.677514	0.796798	0.649077	0.775234	0.752846	0.772479	0.805208	0.740146
24	2	Female	1900.82	Large	0.108103	0.126268	0.0985685	0.233564	0.221588	0.204278	0.173897	0.234785	0.208624	0.225972	0.385472	0.500864	0.321083	0.280558	0.248332	0.122775	0.19122	0.256446	0.303373	0.237738	0.220099	0.4501	0.402661	0.341853	0.317804	0.488368	0.457779	0.35622	0.832509	0.859537	0.81618	0.813943	0.695276	0.714363	0.678524	0.709411	0.676158	0.704486	0.874986	0.718462	0.775188	0.780825	0.770271	0.812116	0.751638
24	3	Female	1924.31	Large	0.113502	0.120303	0.112511	0.230829	0.250725	0.215663	0.162146	0.231059	0.219432	0.20818	0.397915	0.473918	0.317309	0.27669	0.232168	0.12799	0.198937	0.26709	0.293326	0.262452	0.225511	0.435424	0.382137	0.364409	0.264549	0.491421	0.470162	0.351023	0.851736	0.847105	0.816007	0.818707	0.669423	0.660073	0.666998	0.707264	0.671311	0.678409	0.788269	0.659349	0.756566	0.750318	0.754968	0.82007	0.757415
24	4	Female	1910.97	Large	0.126281	0.134268	0.113705	0.20242	0.22509	0.217081	0.17268	0.210475	0.219588	0.208534	0.419507	0.509361	0.313467	0.25867	0.257949	0.1173	0.191606	0.267701	0.324705	0.245996	0.218476	0.443434	0.445187	0.40704	0.355329	0.509052	0.478431	0.353941	0.832517	0.855577	0.812442	0.834535	0.712921	0.721155	0.699573	0.732156	0.695887	0.71982	0.754356	0.718757	0.792581	0.785503	0.790229	0.821568	0.749219
24	5	Female	1910.01	Large	0.114051	0.126094	0.0996521	0.21492	0.220454	0.230313	0.182991	0.221648	0.222517	0.207669	0.408775	0.494043	0.310929	0.27709	0.25978	0.133715	0.199179	0.27643	0.300047	0.24615	0.235	0.449159	0.423628	0.383872	0.273008	0.486932	0.475135	0.372825	0.877689	0.896291	0.851082	0.851082	0.730238	0.720351	0.696709	0.724472	0.678082	0.694047	0.85436	0.718444	0.807868	0.815679	0.793832	0.839204	0.75762
24	6	Female	1895.77	Large	0.119451	0.141996	0.121159	0.225499	0.236438	0.227135	0.188976	0.240129	0.226521	0.199093	0.371563	0.494127	0.318045	0.294718	0.264345	0.148882	0.203194	0.274799	0.278821	0.247635	0.228096	0.421726	0.377022	0.346223	0.312738	0.471672	0.462716	0.333685	0.878001	0.907664	0.852205	0.842967	0.680793	0.681928	0.684265	0.708778	0.682919	0.651743	0.864529	0.636497	0.774412	0.76829	0.78755	0.851369	0.744226
25	1	Female	1812.85	Large	0.127091	0.166096	0.122611	0.185942	0.192173	0.202146	0.163868	0.205883	0.192909	0.225338	0.34634	0.426299	0.305259	0.243442	0.213478	0.126328	0.202245	0.260495	0.27029	0.23802	0.203519	0.449282	0.444202	0.366422	0.241334	0.491065	0.468607	0.339693	0.843782	0.851629	0.823135	0.805689	0.681594	0.675671	0.675483	0.682124	0.675183	0.661146	0.746469	0.589106	0.760715	0.768291	0.758025	0.824943	0.747181
25	2	Female	1845.22	Large	0.141052	0.168996	0.130748	0.194732	0.20956	0.214065	0.206291	0.239608	0.238628	0.241425	0.36955	0.438338	0.299731	0.267535	0.251699	0.122241	0.242116	0.245617	0.277483	0.259011	0.211439	0.427472	0.362085	0.375172	0.354569	0.488259	0.455106	0.355231	0.841011	0.855035	0.824958	0.781785	0.668079	0.654859	0.659063	0.696475	0.658663	0.654393	0.72876	0.621666	0.739553	0.712659	0.75337	0.822837	0.728898
25	3	Female	1862.74	Large	0.129329	0.15339	0.131432	0.220766	0.207902	0.197262	0.202719	0.215607	0.193602	0.211213	0.362413	0.453478	0.300566	0.2556	0.24719	0.136958	0.259074	0.26471	0.268403	0.262802	0.20047	0.44829	0.423524	0.359501	0.29956	0.502815	0.458876	0.35406	0.805482	0.825528	0.791374	0.77717	0.664778	0.646859	0.671897	0.696878	0.673719	0.661706	0.787724	0.628612	0.709345	0.698123	0.70338	0.768608	0.700191
25	4	Female	1849.88	Large	0.134707	0.149496	0.121567	0.207485	0.197609	0.22165	0.185536	0.236019	0.217052	0.253292	0.387241	0.497377	0.300223	0.263762	0.249924	0.153845	0.26804	0.298747	0.270996	0.263293	0.195877	0.45978	0.432229	0.355962	0.356945	0.513103	0.474667	0.371866	0.841013	0.851751	0.820244	0.79472	0.677716	0.681224	0.673813	0.695425	0.659018	0.680752	0.863717	0.683051	0.753814	0.744618	0.754011	0.804065	0.719741
25	5	Female	1846.94	Large	0.13188	0.144426	0.109739	0.204934	0.199449	0.217424	0.178176	0.231082	0.23471	0.244557	0.374998	0.497485	0.31337	0.258681	0.256691	0.135732	0.273696	0.284639	0.268943	0.271075	0.216653	0.471382	0.435419	0.393194	0.357631	0.503126	0.478963	0.379758	0.820253	0.848857	0.796741	0.823256	0.680485	0.678071	0.66782	0.685089	0.671203	0.666187	0.904073	0.665815	0.757949	0.760248	0.746236	0.822404	0.730228
25	6	Female	1828.39	Large	0.161312	0.16184	0.14299	0.213797	0.193095	0.200481	0.207697	0.233346	0.251958	0.253499	0.347728	0.499407	0.325721	0.258255	0.254294	0.145255	0.224788	0.25985	0.27711	0.244469	0.212478	0.443158	0.409394	0.343129	0.308072	0.497436	0.458417	0.367814	0.845417	0.846466	0.824084	0.830872	0.715995	0.721281	0.707302	0.731932	0.700901	0.71852	0.906647	0.698104	0.794935	0.777144	0.771269	0.814217	0.767121
[truncated: 151 more columns]
