# Supplementary material for: Uncovering a ‘sensitive window’ of multisensory and motor neuroplasticity in the cerebrum and cerebellum of male and female starlings
Source: eLife. 2021 Jun 7;10:e66777. doi: 10.7554/eLife.66777 (PMC8219385; doi:10.7554/eLife.66777)
Supplement: Figure 9—source data 1. [file elife-66777-fig9-data1.xlsx]

## Sheet: Sheet1
time	sex	subject_nr	time_nr	T(ng/ml)	E2(pg/ml)
PR	Male	1	1
SD4	Male	1	6	0.0885
SD8	Male	1	10	0.886
SD12	Male	1	14	0.0885
LD4	Male	1	19	2.302
LD16	Male	1	31	0.014
PR	Male	2	1	0.0245
SD4	Male	2	6	0.1365
SD8	Male	2	10	0.0565
SD12	Male	2	14	3.4295
LD4	Male	2	19	4.1005
LD16	Male	2	31	0
PR	Male	3	1	0.052
SD4	Male	3	6	0.041
SD8	Male	3	10	0
SD12	Male	3	14
LD4	Male	3	19	1.8285
LD16	Male	3	31
PR	Male	4	1
SD4	Male	4	6
SD8	Male	4	10	0.0485
SD12	Male	4	14	0.0875
LD4	Male	4	19	1.2805
LD16	Male	4	31	0
PR	Male	5	1
SD4	Male	5	6	0.0295
SD8	Male	5	10	0.0505
PR	Male	6	1
SD4	Male	6	6
SD8	Male	6	10	0
SD12	Male	6	14
LD4	Male	6	19	0.399
LD16	Male	6	31	0
PR	Male	7	1	0
SD4	Male	7	6	0
SD8	Male	7	10	0.3375
SD12	Male	7	14	0.0465
LD4	Male	7	19
LD16	Male	7	31
PR	Male	8	1	0.03
SD4	Male	8	6	0.1945
SD8	Male	8	10	0.0735
SD12	Male	8	14	0.0695
LD4	Male	8	19	3.882
LD16	Male	8	31	0
PR	Male	9	1	0
SD4	Male	9	6
SD8	Male	9	10	0.324
SD12	Male	9	14	0.049
LD4	Male	9	19	0.3215
LD16	Male	9	31
PR	Male	10	1	0.057
SD4	Male	10	6	0.0735
SD8	Male	10	10	0.057
SD12	Male	10	14
LD4	Male	10	19	0.054
LD16	Male	10	31
PR	Male	11	1	0.1125
SD4	Male	11	6	0.0625
SD8	Male	11	10
SD12	Male	11	14	0.073
LD4	Male	11	19	0.484
LD16	Male	11	31	0.0325
PR	Male	12	1	0.0485
SD4	Male	12	6
SD8	Male	12	10	0.161
SD12	Male	12	14
LD4	Male	12	19
LD16	Male	12	31	0
PR	Male	13	1	0.0475
SD4	Male	13	6	0.0855
SD8	Male	13	10	0.1125
SD12	Male	13	14	1.24
LD4	Male	13	19	2.0505
LD16	Male	13	31	0.027
PR	Fem	1	1	0.0525	48.5645
SD4	Fem	1	6	0.345	36.7845
SD8	Fem	1	10	0.008	35.4375
SD12	Fem	1	14	0.0015	41.506
LD4	Fem	1	19	0.008	58.898
LD16	Fem	1	31	0	28.0415
PR	Fem	2	1	0.0075
SD4	Fem	2	6	0
SD8	Fem	2	10	0	43.843
SD12	Fem	2	14	0	36.1255
LD4	Fem	2	19	0.0225	70.776
LD16	Fem	2	31	0	30.792
PR	Fem	3	1	0.0125	45.904
SD4	Fem	3	6	0.268	60.7835
SD8	Fem	3	10	0	46.643
SD12	Fem	3	14
LD4	Fem	3	19	1.164
LD16	Fem	3	31	0.002	48.5905
PR	Fem	4	1	0.009	40.84
SD4	Fem	4	6	0.07	41.6625
SD8	Fem	4	10	0	39.301
SD12	Fem	4	14	0	37.25
LD4	Fem	4	19	1.583	61.597
LD16	Fem	4	31	0.0045
PR	Fem	5	1	0.0015	43.492
SD4	Fem	5	6	0.0035
SD8	Fem	5	10	0.0055	33.935
SD12	Fem	5	14	0
LD4	Fem	5	19	0.0185	71.158
LD16	Fem	5	31	0.0005	38.7505
PR	Fem	6	1	0.023	46.051
SD4	Fem	6	6	0.1415	32.504
SD8	Fem	6	10	0.446
SD12	Fem	6	14	0.9175	44.731
LD4	Fem	6	19	0.0735	47.368
LD16	Fem	6	31	0	46.0265
PR	Fem	7	1	0.0145	58.914
SD4	Fem	7	6	0.0865	37.731
SD8	Fem	7	10	0.5505	39.163
SD12	Fem	7	14	1.407	46.7425
LD4	Fem	7	19	1.293	81.473
LD16	Fem	7	31	0.0185	25.0095
PR	Fem	8	1	0.0065	50.8175
SD4	Fem	8	6	0	31.0095
SD8	Fem	8	10	0	39.025
SD12	Fem	8	14	0.378	50.9715
LD4	Fem	8	19	0.0365	87.9535
LD16	Fem	8	31	0	34.9725
PR	Fem	9	1	0.0265	58.85
SD4	Fem	9	6	0.0255	50.9155
SD8	Fem	9	10	0	42.0795
SD12	Fem	9	14	1.639	77.1355
LD4	Fem	9	19	0.0575	90.384
LD16	Fem	9	31	0	26.8455
PR	Fem	10	1	0.0125	31.1585
SD4	Fem	10	6	0	30.2925
SD8	Fem	10	10	0	48.8745
SD12	Fem	10	14	0.123	37.0975
LD4	Fem	10	19	0	46.445
LD16	Fem	10	31	0.011	32.116
PR	Fem	11	1	0.0065	59.38
SD4	Fem	11	6	0.021	37.2295
SD8	Fem	11	10	0	40.686
SD12	Fem	11	14	0.1875
LD4	Fem	11	19	0.256	63.255
LD16	Fem	11	31	0.0125	30.4125
PR	Fem	12	1	0	49.2645
SD4	Fem	12	6	0.006	31.603
SD8	Fem	12	10	0.0755	40.862
SD12	Fem	12	14	0	42.42
LD4	Fem	12	19	0.003
LD16	Fem	12	31	0.0295	37.1685
