# Supplementary material for: Uncovering a ‘sensitive window’ of multisensory and motor neuroplasticity in the cerebrum and cerebellum of male and female starlings
Source: eLife. 2021 Jun 7;10:e66777. doi: 10.7554/eLife.66777 (PMC8219385; doi:10.7554/eLife.66777)
Supplement: Figure 10—source data 1. [file elife-66777-fig10-data1.xlsx]

## Sheet: Sheet1
subject_nr	time_nr	sex	brain size	Brainsize	BW	songrate			Subject	Time_nr	Sex	Time	song bout length			subject_nr	sex	brain size	Av_brainsize	Av_BW
1	1	Male	Large	1904.7	73				PuPu	1	Female	PR	21.7493			1	Male	large	1900.77	76.8333
1	6	Male	Large	1899.3	78	1.75			PuPu	1	Female	PR	23.3004			2	Male	small	1778.48	73.3333
1	10	Male	Large	1900.2	74	1			PuPu	1	Female	PR	25.8609			3	Male	small	1774.33	82.6667
1	14	Male	Large	1899	75				PuPu	1	Female	PR	26.0795			4	Male	small	1804.93	75.5
1	19	Male	Large	1896.7	84	3.75			PuPu	1	Female	PR	22.9236			5	Male	large	1919.33	84
1	31	Male	Large	1904.7	77	0			PuPu	1	Female	PR	26.1726			6	Male	small	1804.4	78.1667
2	1	Male	Small	1794.5	72				PuPu	1	Female	PR	27.0212			7	Male	large	1859.88	75.6
2	6	Male	Small	1776.3	75	0			PuPu	1	Female	PR	26.2348			8	Male	small	1729.08	76.3333
2	10	Male	Small	1777.5	72	0.25			PuPu	1	Female	PR	23.3599			9	Male	large	1810.55	79.3333
2	14	Male	Small	1772.9	72				PuPu	1	Female	PR	29.5344			10	Male	large	1957.77	85.6667
2	19	Male	Small	1755.2	77				PuPu	1	Female	PR	25.1133			11	Male	large	1853.72	78
2	31	Male	Small	1794.5	72	0			PuPu	1	Female	PR	26.876			12	Male	small	1747.27	76.3333
3	1	Male	Small	1777.3	76				PuSiGo	1	Female	PR	10.8152			13	Male	small	1736.63	86.3333
3	6	Male	Small	1773.3	92	0			PuSiGo	1	Female	PR	14.0212			14	Fem	large	1904.99	85.8333
3	10	Male	Small	1775.2	74				WhBlGo	1	Female	PR	10.9581			15	Fem	small	1705.14	73.1667
3	14	Male	Small	1772.3	79				BlGoGo	6	Female	SD4	21.4752			16	Fem	small	1736.95	76.8333
3	19	Male	Small	1770.6	94				BlGoGo	6	Female	SD4	32.5186			17	Fem	small	1794.3	77.8
3	31	Male	Small	1777.3	81	0.75			BlGoGo	6	Female	SD4	27.948			18	Fem	small	1595.12	70.6667
4	1	Male	Small	1812	74				BlGoGo	6	Female	SD4	30.4472			19	Fem	large	1843.63	82.5
4	6	Male	Small	1802.2	73	0.5			BlGoGo	6	Female	SD4	28.1595			20	Fem	large	1876.46	83.3333
4	10	Male	Small	1801.7	74	17.25			BlGoGo	6	Female	SD4	24.4074			21	Fem	large	1815.19	83.5
4	14	Male	Small	1801.4	75				BlGoGo	6	Female	SD4	21.937			22	Fem	small	1605.3	73.3333
4	19	Male	Small	1800.3	80				BlGoGo	6	Female	SD4	31.7198			23	Fem	small	1616.98	68.1667
4	31	Male	Small	1812	77	38.25			BlGoGo	6	Female	SD4	24.2601			24	Fem	large	1904.24	79.6667
5	1	Male	Large	1929.32	82				BlGoGo	6	Female	SD4	28.3541			25	Fem	large	1841	79.5
5	6	Male	Large	1909.34	86				BlGoGo	6	Female	SD4	34.2243
6	1	Male	Small	1807.6	73				BlGoGo	6	Female	SD4	25.0224
6	6	Male	Small	1803.9	77	0			BlGoGo	6	Female	SD4	23.3585
6	10	Male	Small	1803.4	91	0			BlGoGo	6	Female	SD4	26.0123
6	14	Male	Small	1803.7	73				BlGoGo	6	Female	SD4	17.3258
6	19	Male	Small	1800.2	89	5			BlGoGo	6	Female	SD4	24.4219
6	31	Male	Small	1807.6	66	0			BlGoGo	6	Female	SD4	24.6813
7	1	Male	Large	1861.8	77				BlGoGo	6	Female	SD4	32.8723
7	6	Male	Large	1860.8	76	0			BlGoGo	6	Female	SD4	31.8744
7	10	Male	Large	1859.2	73	6.5			BlGoGo	6	Female	SD4	22.4806
7	19	Male	Large	1855.8	73				GoRR	6	Female	SD4	16.6664
7	31	Male	Large	1861.8	79	29			GoRR	6	Female	SD4	16.6714
8	1	Male	Small	1739.3	73				GoRR	6	Female	SD4	24.1315
8	6	Male	Small	1725.4	76	2.25			GoRR	6	Female	SD4	15.6767
8	10	Male	Small	1724.9	73	8			GoRR	6	Female	SD4	26.3483
8	14	Male	Small	1726.9	71				GoRR	6	Female	SD4	34.7855
8	19	Male	Small	1718.7	83	8.5			GoRR	6	Female	SD4	20.0605
8	31	Male	Small	1739.3	82	0			GoRR	6	Female	SD4	10.6022
9	1	Male	Large	1813.5	79				GoRR	6	Female	SD4	32.1575
9	6	Male	Large	1809.8	76	6			GoRR	6	Female	SD4	20.5329
9	10	Male	Large	1808.2	81	7.75			GoRR	6	Female	SD4	25.8699
9	14	Male	Large	1811.2	79				GoRR	6	Female	SD4	13.4138
9	19	Male	Large	1807.1	84	2			GoRR	6	Female	SD4	24.3816
9	31	Male	Large	1813.5	77	11.25			GoRR	6	Female	SD4	27.5349
10	1	Male	Large	1973.1	80				GoRR	6	Female	SD4	25.6824
10	6	Male	Large	1953.5	85				PuPu	6	Female	SD4	29.5701
10	10	Male	Large	1953.4	89	7			PuPu	6	Female	SD4	33.6568
10	14	Male	Large	1948.4	83				PuPu	6	Female	SD4	25.0418
10	19	Male	Large	1945.1	96	0			PuPu	6	Female	SD4	24.9089
10	31	Male	Large	1973.1	81	0.25			PuPu	6	Female	SD4	27.0586
11	1	Male	Large	1862.5	75				PuPu	6	Female	SD4	29.6758
11	6	Male	Large	1851.5	78				PuPu	6	Female	SD4	25.7251
11	10	Male	Large	1851.5	74	0			PuPu	6	Female	SD4	27.0778
11	14	Male	Large	1846.5	75				PuPu	6	Female	SD4	27.632
11	19	Male	Large	1847.8	90				PuPu	6	Female	SD4	26.742
11	31	Male	Large	1862.5	76				PuPu	6	Female	SD4	29.4773
12	1	Male	Small	1758	73				PuPu	6	Female	SD4	27.8373
12	6	Male	Small	1740.5	76				PuPu	6	Female	SD4	26.6302
12	10	Male	Small	1742.4	74	19.5			PuPu	6	Female	SD4	28.2533
12	14	Male	Small	1743	77				PuPu	6	Female	SD4	27.5563
12	19	Male	Small	1741.7	83	14.5			PuPu	6	Female	SD4	30.2076
12	31	Male	Small	1758	75	22			PuPu	6	Female	SD4	30.3319
13	1	Male	Small	1744.5	86				PuPu	6	Female	SD4	32.6579
13	6	Male	Small	1731.3	84	0.5			PuPu	6	Female	SD4	32.7513
13	10	Male	Small	1734	79	5			PuPu	6	Female	SD4	25.7773
13	14	Male	Small	1734.2	85				PuSiGo	6	Female	SD4	21.1273
13	19	Male	Small	1731.3	98	8.25			PuSiGo	6	Female	SD4	24.5973
13	31	Male	Small	1744.5	86	8			PuSiGo	6	Female	SD4	22.7142
14	1	Fem	large	1889.06	85	0			PuSiGo	6	Female	SD4	24.2327
14	6	Fem	large	1911.4	82	31.25			PuSiGo	6	Female	SD4	20.5144
14	10	Fem	large	1893.85	80	36.25			PuSiGo	6	Female	SD4	16.5684
14	14	Fem	large	1915.88	85	27			PuSiGo	6	Female	SD4	13.8964
14	19	Fem	large	1913.93	102	0			PuSiGo	6	Female	SD4	20.7898
14	31	Fem	large	1905.85	81	5			PuSiGo	6	Female	SD4	29.3432
15	1	Fem	small	1716.04	73	0			PuSiGo	6	Female	SD4	9.09308
15	6	Fem	small	1731.33	68				PuSiGo	6	Female	SD4	13.8921
15	10	Fem	small	1712.76	65	0			PuSiGo	6	Female	SD4	22.5609
15	14	Fem	small	1694.36	73	0.25			PuSiGo	6	Female	SD4	28.143
15	19	Fem	small	1694.15	91				PuSiGo	6	Female	SD4	24.7657
15	31	Fem	small	1682.18	69	0			PuSiGo	6	Female	SD4	27.9739
16	1	Fem	small	1735.5	71	0			PuSiGo	6	Female	SD4	32.9552
16	6	Fem	small	1734.15	72				PuSiGo	6	Female	SD4	21.8812
16	10	Fem	small	1743.03	74	0			PuSiGo	6	Female	SD4	22.4241
16	14	Fem	small	1739.23	75	0			PuSiGo	6	Female	SD4	22.2205
16	19	Fem	small	1720.53	97				PuSiGo	6	Female	SD4	17.2189
16	31	Fem	small	1749.24	72	0			WhBlGo	6	Female	SD4	8.15811
17	1	Fem	small	1763.32	71				WhBlGo	6	Female	SD4	8.19627
17	6	Fem	small	1803.66	72	3.75			WhBlGo	6	Female	SD4	13.6537
17	10	Fem	small	1820.24	80				YeYe	6	Female	SD4	27.3183
17	19	Fem	small	1795.84	92	0			BlGoGo	10	Female	SD8	22.3251
17	31	Fem	small	1788.42	74	0			BlGoGo	10	Female	SD8	26.2298
18	1	Fem	small	1590.88	74	3			BlGoGo	10	Female	SD8	37.047
18	6	Fem	small	1602.99	72	8			BlGoGo	10	Female	SD8	22.3597
18	10	Fem	small	1597.51	65	1			BlGoGo	10	Female	SD8	30.8687
18	14	Fem	small	1591.26	64	6.5			BlGoGo	10	Female	SD8	23.6466
18	19	Fem	small	1603.09	81	0			BlGoGo	10	Female	SD8	27.7109
18	31	Fem	small	1585.02	68	0			BlGoGo	10	Female	SD8	27.6158
19	1	Fem	large	1829.28	89	0.5			BlGoGo	10	Female	SD8	24.42
19	6	Fem	large	1849.5	79	16.25			BlGoGo	10	Female	SD8	18.7406
19	10	Fem	large	1849.01	73	38			BlGoGo	10	Female	SD8	30.7715
19	14	Fem	large	1848.94	77	40.75			BlGoGo	10	Female	SD8	31.0288
19	19	Fem	large	1849.15	98	7.75			BlGoGo	10	Female	SD8	30.328
19	31	Fem	large	1835.9	79	10			BlGoGo	10	Female	SD8	22.5346
20	1	Fem	large	1859.92	84	0			BlGoGo	10	Female	SD8	20.8266
20	6	Fem	large	1879.05	80				BlGoGo	10	Female	SD8	32.5148
20	10	Fem	large	1906.06	80	0.75			BlGoGo	10	Female	SD8	28.6819
20	14	Fem	large	1855.68	86				BlGoGo	10	Female	SD8	30.4746
20	19	Fem	large	1889.02	96	2			BlGoGo	10	Female	SD8	33.9573
20	31	Fem	large	1869	74	0			BlGoGo	10	Female	SD8	32.0175
21	1	Fem	large	1799.61	86	0.25			PuPu	10	Female	SD8	13.814
21	6	Fem	large	1815.94	84	0.75			PuPu	10	Female	SD8	26.5567
21	10	Fem	large	1830.13	82	0			PuPu	10	Female	SD8	29.2537
21	14	Fem	large	1827.93	82				PuPu	10	Female	SD8	23.7211
21	19	Fem	large	1818.26	88				PuSiGo	10	Female	SD8	17.2836
21	31	Fem	large	1799.28	79	0			PuSiGo	10	Female	SD8	21.9291
22	1	Fem	small	1570.46	76				PuSiGo	10	Female	SD8	20.045
22	6	Fem	small	1623.69	71	0			PuSiGo	10	Female	SD8	27.859
22	10	Fem	small	1613.74	70				PuSiGo	10	Female	SD8	28.4778
22	14	Fem	small	1619.78	71	0			PuSiGo	10	Female	SD8	22.1084
22	19	Fem	small	1611.42	89	0			PuSiGo	10	Female	SD8	33.8627
22	31	Fem	small	1592.69	63	0			PuSiGo	10	Female	SD8	29.697
23	1	Fem	small	1587.82	69				PuSiGo	10	Female	SD8	26.9169
23	6	Fem	small	1631.58	66	0			PuSiGo	10	Female	SD8	22.2562
23	10	Fem	small	1631.64	64	0			PuSiGo	10	Female	SD8	31.7623
23	14	Fem	small	1625.23	68	0			PuSiGo	10	Female	SD8	22.3264
23	19	Fem	small	1631.19	77	0			PuSiGo	10	Female	SD8	29.6416
23	31	Fem	small	1594.42	65	0			PuSiGo	10	Female	SD8	27.0647
24	1	Fem	large	1883.57	78	0			PuSiGo	10	Female	SD8	24.9218
24	6	Fem	large	1900.82	73	0			PuSiGo	10	Female	SD8	20.2389
24	10	Fem	large	1924.31	70	9.25			PuSiGo	10	Female	SD8	25.0548
24	14	Fem	large	1910.97	75	28.75			PuSiGo	10	Female	SD8	30.1496
24	19	Fem	large	1910.01	103	4.25			PuSiGo	10	Female	SD8	25.0234
24	31	Fem	large	1895.77	79	5			PuSiGo	10	Female	SD8	29.4754
25	1	Fem	large	1812.85	77	0			RPu	10	Female	SD8	26.3724
25	6	Fem	large	1845.22	73	0.25			RPu	10	Female	SD8	30.7019
25	10	Fem	large	1862.74	77				RPu	10	Female	SD8	32.6357
25	14	Fem	large	1849.88	77	0			YePu	10	Female	SD8	16.4832
25	19	Fem	large	1846.94	92	0			YePu	10	Female	SD8	23.695
25	31	Fem	large	1828.39	81	0			YePu	10	Female	SD8	29.3642
									YePu	10	Female	SD8	21.9387
									YePu	10	Female	SD8	31.468
									YePu	10	Female	SD8	27.5178
									YePu	10	Female	SD8	39.5144
									YePu	10	Female	SD8	28.8697
									YePu	10	Female	SD8	27.1862
									YePu	10	Female	SD8	38.2957
									YePu	10	Female	SD8	26.6063
									YePu	10	Female	SD8	29.4582
									YePu	10	Female	SD8	32.025
									YePu	10	Female	SD8	28.765
									YePu	10	Female	SD8	22.1696
									YePu	10	Female	SD8	34.3829
									YePu	10	Female	SD8	34.8209
									YePu	10	Female	SD8	31.123
									YePu	10	Female	SD8	25.5878
									YePu	10	Female	SD8	30.8949
									BlGoGo	14	Female	SD12	45.931
									BlGoGo	14	Female	SD12	25.5868
									BlGoGo	14	Female	SD12	34.053
									BlGoGo	14	Female	SD12	40.2337
									BlGoGo	14	Female	SD12	33.327
									BlGoGo	14	Female	SD12	40.7956
									BlGoGo	14	Female	SD12	33.3602
									BlGoGo	14	Female	SD12	24.5154
									BlGoGo	14	Female	SD12	31.2118
									BlGoGo	14	Female	SD12	45.1558
									BlGoGo	14	Female	SD12	25.1065
									BlGoGo	14	Female	SD12	37.0862
									BlGoGo	14	Female	SD12	41.0357
									BlGoGo	14	Female	SD12	30.3436
									BlGoGo	14	Female	SD12	39.109
									BlGoGo	14	Female	SD12	39.7796
									BlGoGo	14	Female	SD12	28.838
									BlGoGo	14	Female	SD12	45.2291
									BlGoGo	14	Female	SD12	25.3744
									BlGoGo	14	Female	SD12	39.7519
									BlYe	14	Female	SD12	9.55973
									PuPu	14	Female	SD12	24.0093
									PuPu	14	Female	SD12	25.9906
									PuPu	14	Female	SD12	33.0186
									PuPu	14	Female	SD12	27.5
									PuPu	14	Female	SD12	33.6075
									PuPu	14	Female	SD12	26.5234
									PuPu	14	Female	SD12	25.8504
									PuPu	14	Female	SD12	28.8598
									PuPu	14	Female	SD12	28.2897
									PuPu	14	Female	SD12	28.757
									PuPu	14	Female	SD12	32.9346
									PuPu	14	Female	SD12	26.3037
									PuPu	14	Female	SD12	26.9626
									PuPu	14	Female	SD12	24.5794
									PuPu	14	Female	SD12	26.3458
									PuPu	14	Female	SD12	29.3084
									PuPu	14	Female	SD12	26.4299
									PuPu	14	Female	SD12	26.2897
									PuPu	14	Female	SD12	29.7991
									PuPu	14	Female	SD12	28.8037
									PuSiGo	14	Female	SD12	22.5234
									PuSiGo	14	Female	SD12	32.0374
									PuSiGo	14	Female	SD12	18.2336
									PuSiGo	14	Female	SD12	32.028
									PuSiGo	14	Female	SD12	16.5608
									PuSiGo	14	Female	SD12	18.972
									PuSiGo	14	Female	SD12	18.3551
									PuSiGo	14	Female	SD12	22.3458
									PuSiGo	14	Female	SD12	29.4112
									PuSiGo	14	Female	SD12	19.5607
									PuSiGo	14	Female	SD12	27.7664
									PuSiGo	14	Female	SD12	24.0654
									PuSiGo	14	Female	SD12	34.8972
									PuSiGo	14	Female	SD12	21.3925
									PuSiGo	14	Female	SD12	31.1495
									PuSiGo	14	Female	SD12	37.5514
									PuSiGo	14	Female	SD12	15.9159
									PuSiGo	14	Female	SD12	14.4766
									PuSiGo	14	Female	SD12	26.0467
									PuSiGo	14	Female	SD12	15.8598
									YePu	14	Female	SD12	25.9009
									YePu	14	Female	SD12	33.6281
									YePu	14	Female	SD12	26.5234
									YePu	14	Female	SD12	22.1361
									YePu	14	Female	SD12	19.1675
									YePu	14	Female	SD12	16.2709
									YePu	14	Female	SD12	28.3208
									YePu	14	Female	SD12	40.5
									YePu	14	Female	SD12	37.5351
									YePu	14	Female	SD12	34.4538
									YePu	14	Female	SD12	27.9791
									YePu	14	Female	SD12	26.843
									YePu	14	Female	SD12	25.6053
									YePu	14	Female	SD12	28.2654
									YePu	14	Female	SD12	32.8836
									YePu	14	Female	SD12	20.5899
									YePu	14	Female	SD12	32.7912
									YePu	14	Female	SD12	32.7506
									YePu	14	Female	SD12	22.2654
									YePu	14	Female	SD12	30.556
									PuSiGo	19	Female	LD4	21.1478
									PuSiGo	19	Female	LD4	16.8621
									PuSiGo	19	Female	LD4	14.2056
									PuSiGo	19	Female	LD4	23.0006
									PuSiGo	19	Female	LD4	19.2599
									PuSiGo	19	Female	LD4	17.4865
									PuSiGo	19	Female	LD4	21.4304
									PuSiGo	19	Female	LD4	23.0468
									PuSiGo	19	Female	LD4	27.7574
									PuSiGo	19	Female	LD4	24.7186
									PuSiGo	19	Female	LD4	25.0696
									PuSiGo	19	Female	LD4	25.5868
									PuSiGo	19	Female	LD4	18.9126
									PuSiGo	19	Female	LD4	27.3639
									PuSiGo	19	Female	LD4	32.1041
									PuSiGo	19	Female	LD4	20.1927
									PuSiGo	19	Female	LD4	23.8725
									PuSiGo	19	Female	LD4	33.0647
									PuSiGo	19	Female	LD4	32.2463
									PuSiGo	19	Female	LD4	18.8719
									RPu	19	Female	LD4	20.2861
									RPu	19	Female	LD4	29.3561
									RPu	19	Female	LD4	26.9941
									RPu	19	Female	LD4	34.0792
									RPu	19	Female	LD4	22.7112
									RPu	19	Female	LD4	27.997
									RPu	19	Female	LD4	33.7303
									RPu	19	Female	LD4	34.235
									YePu	19	Female	LD4	21.5392
									YePu	19	Female	LD4	41.4975
									YePu	19	Female	LD4	38.9214
									YePu	19	Female	LD4	32.6492
									YePu	19	Female	LD4	22.4507
									YePu	19	Female	LD4	19.2939
									YePu	19	Female	LD4	26.3619
									YePu	19	Female	LD4	23.0356
									YePu	19	Female	LD4	19.1457
									YePu	19	Female	LD4	21.977
									YePu	19	Female	LD4	33.8251
									YePu	19	Female	LD4	36.8448
									YePu	19	Female	LD4	19.8475
									YePu	19	Female	LD4	33.6706
									YePu	19	Female	LD4	30.7233
									YePu	19	Female	LD4	33.9008
									YePu	19	Female	LD4	34.7496
									BlGoGo	31	Female	LD16	32.806
									BlGoGo	31	Female	LD16	28.7365
									BlGoGo	31	Female	LD16	21.2494
									BlGoGo	31	Female	LD16	24.7925
									BlGoGo	31	Female	LD16	27.157
									BlGoGo	31	Female	LD16	42.3103
									BlGoGo	31	Female	LD16	25.2949
									BlGoGo	31	Female	LD16	23.9982
									BlGoGo	31	Female	LD16	34.5739
									BlGoGo	31	Female	LD16	17.8596
									BlGoGo	31	Female	LD16	31.9101
									BlGoGo	31	Female	LD16	21.4433
									BlGoGo	31	Female	LD16	16.7235
									BlGoGo	31	Female	LD16	41.359
									BlGoGo	31	Female	LD16	34.1213
									BlGoGo	31	Female	LD16	19.0973
									BlGoGo	31	Female	LD16	24.3122
									BlGoGo	31	Female	LD16	12.2716
									BlGoGo	31	Female	LD16	10.2118
									BlGoGo	31	Female	LD16	9.06651
									PuSiGo	31	Female	LD16	12.9551
									PuSiGo	31	Female	LD16	17.7266
									PuSiGo	31	Female	LD16	17.3608
									PuSiGo	31	Female	LD16	22.9175
									PuSiGo	31	Female	LD16	25.5129
									PuSiGo	31	Female	LD16	17.9612
									PuSiGo	31	Female	LD16	17.4588
									PuSiGo	31	Female	LD16	9.31033
									PuSiGo	31	Female	LD16	13.0474
									PuSiGo	31	Female	LD16	16.0123
									PuSiGo	31	Female	LD16	21.0425
									PuSiGo	31	Female	LD16	12.7703
									PuSiGo	31	Female	LD16	19.2044
									PuSiGo	31	Female	LD16	12.5394
									PuSiGo	31	Female	LD16	26.2934
									PuSiGo	31	Female	LD16	16.4741
									PuSiGo	31	Female	LD16	21.1349
									PuSiGo	31	Female	LD16	15.4581
									PuSiGo	31	Female	LD16	22.8436
									PuSiGo	31	Female	LD16	15.8276
									YePu	31	Female	LD16	17.8134
									YePu	31	Female	LD16	17.4163
									YePu	31	Female	LD16	13.4332
									YePu	31	Female	LD16	19.7523
									YePu	31	Female	LD16	27.5748
									YePu	31	Female	LD16	17.4112
									YePu	31	Female	LD16	33.0561
									YePu	31	Female	LD16	20.4953
									YePu	31	Female	LD16	19.5701
									YePu	31	Female	LD16	16.6682
									YePu	31	Female	LD16	9.95328
									YePu	31	Female	LD16	18.4907
									YePu	31	Female	LD16	20.5421
									YePu	31	Female	LD16	16.1495
									YePu	31	Female	LD16	28.486
									YePu	31	Female	LD16	41.4883
									YePu	31	Female	LD16	19.8645
									YePu	31	Female	LD16	31.6051
									YePu	31	Female	LD16	18.6869
									YePu	31	Female	LD16	19.1776
									GeGrW	6	male	SD4	20.492
									GeGrW	6	male	SD4	16.1693
									GeGrW	6	male	SD4	14.8762
									GeGrW	6	male	SD4	18.4692
									GeGrW	6	male	SD4	23.4476
									GeGrW	6	male	SD4	21.9236
									GeGrW	6	male	SD4	24.4267
									LiSR	6	male	SD4	33.4009
									LiSR	6	male	SD4	20.6269
									WBlBl	6	male	SD4	40.729
									WBlBl	6	male	SD4	30.9066
									WBlBl	6	male	SD4	40.3224
									WBlBl	6	male	SD4	36.9252
									WBlBl	6	male	SD4	34.8785
									WBlBl	6	male	SD4	20.3411
									WBlBl	6	male	SD4	43.3084
									WBlBl	6	male	SD4	39.7477
									WBlBl	6	male	SD4	38.7196
									WGrBl	6	male	SD4	22.6729
									WGrBl	6	male	SD4	16.9813
									WGrBl	6	male	SD4	20.4392
									WGrBl	6	male	SD4	23.9346
									WGrBl	6	male	SD4	22.1495
									WGrBl	6	male	SD4	22.3832
									WGrBl	6	male	SD4	20.6822
									WGrBl	6	male	SD4	26.3458
									WGrBl	6	male	SD4	23.1589
									WGrBl	6	male	SD4	18.7103
									WGrBl	6	male	SD4	24.4766
									WGrBl	6	male	SD4	23.5701
									WGrBl	6	male	SD4	16.5514
									WGrBl	6	male	SD4	22.6729
									WGrBl	6	male	SD4	15.2663
									WGrBl	6	male	SD4	20.2056
									WGrBl	6	male	SD4	18.7383
									WGrBl	6	male	SD4	18.514
									WGrBl	6	male	SD4	15.4486
									WGrBl	6	male	SD4	21.8785
									WWW	6	male	SD4	18.1829
									WWW	6	male	SD4	20.7321
									GeGrW	10	male	SD8	14.9778
									GeGrW	10	male	SD8	17.8227
									GeGrW	10	male	SD8	22.0493
									GeGrW	10	male	SD8	16.5203
									GeLiW	10	male	SD8	13.2063
									LiSR	10	male	SD8	28.1915
									LiSR	10	male	SD8	24.1866
									LiSR	10	male	SD8	27.5773
									LiSR	10	male	SD8	20.4273
									LiSR	10	male	SD8	24.3122
									LiSR	10	male	SD8	23.9935
									LiSR	10	male	SD8	19.7623
									LiSR	10	male	SD8	15.3011
									LiSR	10	male	SD8	22.7789
									LiSR	10	male	SD8	26.4828
									LiSR	10	male	SD8	24.6355
									LiSR	10	male	SD8	33.5302
									LiSR	10	male	SD8	23.2777
									LiSR	10	male	SD8	27.1293
									LiSR	10	male	SD8	37.3688
									LiSR	10	male	SD8	29.0468
									LiSR	10	male	SD8	26.8651
									LiSR	10	male	SD8	22.173
									LiSR	10	male	SD8	31.0548
									LiSR	10	male	SD8	20.5659
									SSW	10	male	SD8	25.476
									SSW	10	male	SD8	21.1293
									SSW	10	male	SD8	27.4618
									SSW	10	male	SD8	23.6841
									SSW	10	male	SD8	28.04
									SSW	10	male	SD8	20.8799
									SSW	10	male	SD8	25.3005
									SSW	10	male	SD8	23.6379
									SSW	10	male	SD8	20.5714
									SSW	10	male	SD8	16.4797
									SSW	10	male	SD8	30.7962
									SSW	10	male	SD8	31.7475
									SSW	10	male	SD8	25.1158
									SSW	10	male	SD8	23.0653
									SSW	10	male	SD8	17.3572
									SSW	10	male	SD8	20.8984
									SSW	10	male	SD8	25.6607
									SSW	10	male	SD8	17.3572
									SSW	10	male	SD8	26.4089
									SSW	10	male	SD8	25.9045
									WBlBl	10	male	SD8	38.3645
									WBlBl	10	male	SD8	45.3178
									WBlBl	10	male	SD8	34.1215
									WBlBl	10	male	SD8	44.6636
									WBlBl	10	male	SD8	54.4299
									WBlBl	10	male	SD8	40.6822
									WBlBl	10	male	SD8	44.3271
									WBlBl	10	male	SD8	43.5841
									WBlBl	10	male	SD8	42.0841
									WBlBl	10	male	SD8	37.9813
									WBlBl	10	male	SD8	40.8972
									WBlBl	10	male	SD8	55.8692
									WBlBl	10	male	SD8	46.7103
									WBlBl	10	male	SD8	38.2149
									WBlBl	10	male	SD8	45.2336
									WBlBl	10	male	SD8	45.8505
									WBlBl	10	male	SD8	35.514
									WBlBl	10	male	SD8	39.3271
									WBlBl	10	male	SD8	42.0093
									WBlBl	10	male	SD8	36.5514
									WGrBl	10	male	SD8	20.271
									WGrBl	10	male	SD8	27.1495
									WGrBl	10	male	SD8	28.3832
									WGrBl	10	male	SD8	32.4673
									WGrBl	10	male	SD8	30.6262
									WGrBl	10	male	SD8	31.2523
									WGrBl	10	male	SD8	32.3738
									WGrBl	10	male	SD8	24.1682
									WGrBl	10	male	SD8	31.0561
									WGrBl	10	male	SD8	26.0935
									WGrBl	10	male	SD8	32.4019
									WGrBl	10	male	SD8	19.9439
									WGrBl	10	male	SD8	29.8598
									WGrBl	10	male	SD8	20.3832
									WGrBl	10	male	SD8	27.1682
									WGrBl	10	male	SD8	18.4579
									WGrBl	10	male	SD8	22.4486
									WGrBl	10	male	SD8	27.9626
									WGrBl	10	male	SD8	31.5701
									WGrBl	10	male	SD8	26.8224
									WLiBl	10	male	SD8	26.2518
									WLiBl	10	male	SD8	35.7543
									WLiBl	10	male	SD8	29.3458
									WLiBl	10	male	SD8	40.7804
									WLiBl	10	male	SD8	44.6729
									WLiBl	10	male	SD8	30.5608
									WLiBl	10	male	SD8	27.7477
									WLiBl	10	male	SD8	32.8318
									WLiBl	10	male	SD8	33.2617
									WLiBl	10	male	SD8	29.2336
									WLiBl	10	male	SD8	26.9159
									WLiBl	10	male	SD8	29.0093
									WLiBl	10	male	SD8	33.9813
									WLiBl	10	male	SD8	31.6542
									WLiBl	10	male	SD8	25.8318
									WLiBl	10	male	SD8	27.271
									WLiBl	10	male	SD8	31.0467
									WLiBl	10	male	SD8	50.2897
									WLiBl	10	male	SD8	26.0187
									WLiBl	10	male	SD8	25.9533
									WWSR	10	male	SD8	21.8972
									WWSR	10	male	SD8	23.8878
									WWSR	10	male	SD8	30.2243
									WWSR	10	male	SD8	29.1963
									WWSR	10	male	SD8	25.3645
									WWSR	10	male	SD8	25.5794
									WWSR	10	male	SD8	32.229
									WWSR	10	male	SD8	25.0841
									WWSR	10	male	SD8	31.4486
									WWSR	10	male	SD8	27.1121
									WWSR	10	male	SD8	32.8785
									WWSR	10	male	SD8	30.9065
									WWSR	10	male	SD8	21.2804
									WWSR	10	male	SD8	24.5888
									WWSR	10	male	SD8	32.5514
									WWSR	10	male	SD8	32.4766
									WWSR	10	male	SD8	27.1495
									WWSR	10	male	SD8	33.8505
									WWSR	10	male	SD8	20.8177
									WWSR	10	male	SD8	26.7944
									WWW	10	male	SD8	21.2217
									WWW	10	male	SD8	29.069
									WWW	10	male	SD8	16.6866
									WWW	10	male	SD8	15.5597
									WWW	10	male	SD8	18.0166
									WWW	10	male	SD8	25.7069
									WWW	10	male	SD8	22.6718
									WWW	10	male	SD8	18.9218
									WWW	10	male	SD8	18.3455
									WWW	10	male	SD8	32.4126
									WWW	10	male	SD8	18.2106
									WWW	10	male	SD8	20.6398
									WWW	10	male	SD8	22.2987
									WWW	10	male	SD8	25.4483
									WWW	10	male	SD8	20.9548
									WWW	10	male	SD8	14.359
									WWW	10	male	SD8	21.6798
									WWW	10	male	SD8	18.3639
									WWW	10	male	SD8	25.0465
									WWW	10	male	SD8	24.242
									GeGrW	19	male	LD4	24.1034
									GeGrW	19	male	LD4	15.9938
									GeGrW	19	male	LD4	25.9563
									GeGrW	19	male	LD4	20.806
									GeGrW	19	male	LD4	23.6841
									GeGrW	19	male	LD4	34.6847
									GeGrW	19	male	LD4	20.7469
									GeGrW	19	male	LD4	38.9242
									GeGrW	19	male	LD4	36.3805
									GeGrW	19	male	LD4	24.8941
									GeGrW	19	male	LD4	31.064
									GeGrW	19	male	LD4	37.9507
									GeGrW	19	male	LD4	40.6201
									GeGrW	19	male	LD4	20.8522
									GeGrW	19	male	LD4	35.7432
									SSS	19	male	LD4	41.4236
									SSS	19	male	LD4	50.2749
									SSS	19	male	LD4	57.1958
									SSS	19	male	LD4	41.5364
									SSS	19	male	LD4	46.5406
									SSS	19	male	LD4	52.9748
									SSS	19	male	LD4	35.8725
									SSS	19	male	LD4	42.2734
									SSS	19	male	LD4	47.6195
									SSS	19	male	LD4	28.2284
									SSS	19	male	LD4	49.7328
									SSS	19	male	LD4	28.6348
									SSS	19	male	LD4	45.7149
									SSS	19	male	LD4	23.0967
									SSS	19	male	LD4	38.274
									SSS	19	male	LD4	23.2592
									SSS	19	male	LD4	24.7685
									SSS	19	male	LD4	47.9409
									SSS	19	male	LD4	26.4458
									SSS	19	male	LD4	34.6441
									WBlBl	19	male	LD4	43.514
									WBlBl	19	male	LD4	46.1682
									WBlBl	19	male	LD4	42.271
									WBlBl	19	male	LD4	39.8411
									WBlBl	19	male	LD4	61.1776
									WBlBl	19	male	LD4	46.1121
									WBlBl	19	male	LD4	56.229
									WBlBl	19	male	LD4	43.9906
									WBlBl	19	male	LD4	51.1215
									WBlBl	19	male	LD4	43.8318
									WBlBl	19	male	LD4	34.3364
									WBlBl	19	male	LD4	41.5327
									WBlBl	19	male	LD4	34.757
									WBlBl	19	male	LD4	55.4766
									WBlBl	19	male	LD4	43.4953
									WBlBl	19	male	LD4	29.3645
									WBlBl	19	male	LD4	53.3178
									WBlBl	19	male	LD4	43.4579
									WBlBl	19	male	LD4	44.8832
									WBlBl	19	male	LD4	43.0888
									WGrBl	19	male	LD4	28.6348
									WGrBl	19	male	LD4	26.4551
									WGrBl	19	male	LD4	27.3695
									WGrBl	19	male	LD4	30.3159
									WGrBl	19	male	LD4	23.7765
									WGrBl	19	male	LD4	31.0086
									WGrBl	19	male	LD4	48.1801
									WGrBl	19	male	LD4	28.561
									WWSR	19	male	LD4	27.4711
									WWSR	19	male	LD4	30.6207
									WWSR	19	male	LD4	30.3713
									WWSR	19	male	LD4	26.3257
									WWSR	19	male	LD4	27.4156
									WWSR	19	male	LD4	29.226
									WWSR	19	male	LD4	31.0702
									WWSR	19	male	LD4	28.3393
									WWSR	19	male	LD4	33.8867
									WWSR	19	male	LD4	33.665
									WWSR	19	male	LD4	36.4637
									WWSR	19	male	LD4	30.8572
									WWSR	19	male	LD4	31.572
									WWSR	19	male	LD4	33.8682
									WWSR	19	male	LD4	30.0628
									WWSR	19	male	LD4	30.0721
									WWSR	19	male	LD4	30.8202
									WWSR	19	male	LD4	35.4938
									WWSR	19	male	LD4	30.4452
									WWSR	19	male	LD4	24.1921
									WWW	19	male	LD4	18.918
									WWW	19	male	LD4	33.696
									WWW	19	male	LD4	26.409
									WWW	19	male	LD4	31.2266
									WWW	19	male	LD4	20.3128
									WWW	19	male	LD4	24.9033
									WWW	19	male	LD4	14.9039
									WWW	19	male	LD4	20.4698
									WWW	19	male	LD4	26.4828
									WWW	19	male	LD4	16.1047
									WWW	19	male	LD4	25.5111
									WWW	19	male	LD4	16.5905
									WWW	19	male	LD4	26.9723
									WWW	19	male	LD4	16.4649
									WWW	19	male	LD4	23.7802
									WWW	19	male	LD4	22.4132
									WWW	19	male	LD4	15.5228
									WWW	19	male	LD4	15.2365
									WWW	19	male	LD4	22.6127
									WWW	19	male	LD4	28.4039
									LiLiLi	31	male	LD16	17.9815
									LiLiLi	31	male	LD16	23.9926
									LiLiLi	31	male	LD16	16.0308
									LiSR	31	male	LD16	26.8984
									LiSR	31	male	LD16	23.6472
									LiSR	31	male	LD16	27.9144
									LiSR	31	male	LD16	34.7586
									LiSR	31	male	LD16	28.9304
									LiSR	31	male	LD16	28.7734
									LiSR	31	male	LD16	23.1613
									LiSR	31	male	LD16	26.468
									LiSR	31	male	LD16	23.4163
									LiSR	31	male	LD16	22.9452
									LiSR	31	male	LD16	33.9643
									LiSR	31	male	LD16	20.2795
									LiSR	31	male	LD16	31.0881
									LiSR	31	male	LD16	19.9618
									LiSR	31	male	LD16	22.1047
									LiSR	31	male	LD16	26.6305
									LiSR	31	male	LD16	26.2241
									LiSR	31	male	LD16	29.6786
									LiSR	31	male	LD16	31.7845
									LiSR	31	male	LD16	17.5788
									SSW	31	male	LD16	18.729
									SSW	31	male	LD16	25.1682
									SSW	31	male	LD16	28.3832
									SSW	31	male	LD16	33.7477
									SSW	31	male	LD16	20.4953
									SSW	31	male	LD16	22.729
									SSW	31	male	LD16	16.9159
									SSW	31	male	LD16	27.1776
									SSW	31	male	LD16	26.271
									SSW	31	male	LD16	35.215
									SSW	31	male	LD16	22.8037
									SSW	31	male	LD16	32.2337
									SSW	31	male	LD16	27.028
									SSW	31	male	LD16	25.0187
									SSW	31	male	LD16	27.8972
									SSW	31	male	LD16	23.5234
									SSW	31	male	LD16	35.5701
									SSW	31	male	LD16	20.5888
									SSW	31	male	LD16	25.2664
									SSW	31	male	LD16	19.1028
									WGrBl	31	male	LD16	23.1475
									WGrBl	31	male	LD16	28.0437
									WGrBl	31	male	LD16	30.0665
									WGrBl	31	male	LD16	28.8417
									WGrBl	31	male	LD16	23.5215
									WGrBl	31	male	LD16	32.6398
									WGrBl	31	male	LD16	25.4945
									WGrBl	31	male	LD16	23.6841
									WGrBl	31	male	LD16	28.6256
									WGrBl	31	male	LD16	24.9255
									WGrBl	31	male	LD16	18.5339
									WGrBl	31	male	LD16	28.6449
									WGrBl	31	male	LD16	23.2408
									WGrBl	31	male	LD16	34.9895
									WGrBl	31	male	LD16	20.7598
									WGrBl	31	male	LD16	20.8337
									WGrBl	31	male	LD16	25.0548
									WGrBl	31	male	LD16	27.0462
									WGrBl	31	male	LD16	23.3886
									WGrBl	31	male	LD16	14.6176
									WLiBl	31	male	LD16	36.9439
									WWSR	31	male	LD16	21.8368
									WWSR	31	male	LD16	23.3137
									WWSR	31	male	LD16	25.6736
									WWSR	31	male	LD16	15.689
									WWSR	31	male	LD16	27.2586
									WWSR	31	male	LD16	27.7574
									WWSR	31	male	LD16	28.1176
									WWSR	31	male	LD16	22.0068
									WWSR	31	male	LD16	25.8177
									WWSR	31	male	LD16	22.0677
									WWSR	31	male	LD16	19.5037
									WWSR	31	male	LD16	22.9637
									WWSR	31	male	LD16	22.1693
									WWSR	31	male	LD16	17.5825
									WWSR	31	male	LD16	19.7438
									WWSR	31	male	LD16	23.4624
									WWSR	31	male	LD16	18.5856
									WWSR	31	male	LD16	15.218
									WWSR	31	male	LD16	23.7026
									WWSR	31	male	LD16	25.4575
									WWW	31	male	LD16	18.6872
									WWW	31	male	LD16	26.4089
									WWW	31	male	LD16	10.3319
									WWW	31	male	LD16	28.7143
									WWW	31	male	LD16	25.7716
									WWW	31	male	LD16	18.5154
									WWW	31	male	LD16	14.8762
									WWW	31	male	LD16	23.0967
									WWW	31	male	LD16	20.9871
									WWW	31	male	LD16	20.0467
									WWW	31	male	LD16	10.7103
									WWW	31	male	LD16	16.9065
									WWW	31	male	LD16	18
									WWW	31	male	LD16	12.3364
									WWW	31	male	LD16	25.3458
									WWW	31	male	LD16	29.8785
									WWW	31	male	LD16	13.4673
									WWW	31	male	LD16	12.8972
									WWW	31	male	LD16	14.5701
									WWW	31	male	LD16	22.8037
