# Supplementary material for: Uncovering a ‘sensitive window’ of multisensory and motor neuroplasticity in the cerebrum and cerebellum of male and female starlings
Source: eLife. 2021 Jun 7;10:e66777. doi: 10.7554/eLife.66777 (PMC8219385; doi:10.7554/eLife.66777)
Supplement: Figure 11—source data 1. [file elife-66777-fig11-data1.xlsx]

## Sheet: Sheet1
subject_nr	time	sex	SR_F	SR_F_AreaX_Caud_L	SR_F_AreaX_Caud_R	SR_F_LMD_L	SR_F_RA_R	SR_F_hippocampus_L
14	1	Female	0	0.217986	0.224611	0.256581	0.216868	0.185458
14	2	Female	31.25	0.255265	0.267279	0.243556	0.255803	0.224849
14	3	Female	36.25	0.268641	0.264649	0.27464	0.264195	0.221995
14	4	Female	27	0.265138	0.279505	0.278119	0.25651	0.203481
14	5	Female	0	0.252012	0.255547	0.272982	0.252209	0.202265
14	6	Female	5	0.2553	0.263967	0.264589	0.243683	0.215178
15	1	Female	0	0.182575	0.223607	0.222643	0.215564	0.137438
15	2	Female		0.20358	0.21356	0.25889	0.212629	0.127371
15	3	Female	0	0.199767	0.220758	0.23137	0.204291	0.13951
15	4	Female	0.25	0.201089	0.256971	0.248006	0.222862	0.132529
15	5	Female		0.242616	0.259525	0.259553	0.229116	0.151745
15	6	Female	0	0.205926	0.205446	0.25435	0.212159	0.140135
16	1	Female	0	0.196194	0.191101	0.245692	0.209362	0.156113
16	2	Female		0.199223	0.190837	0.208337	0.185119	0.169002
16	3	Female	0	0.202932	0.22184	0.264355	0.205232	0.176114
16	4	Female	0	0.210037	0.192747	0.248359	0.221274	0.148052
16	5	Female		0.177648	0.207985	0.256579	0.2101	0.16764
16	6	Female	0	0.203409	0.175378	0.244996	0.222347	0.172995
17	1	Female		0.23803	0.25067	0.259825	0.24817	0.147213
17	2	Female	3.75	0.223087	0.211204	0.251573	0.234225	0.175034
17	3	Female		0.242075	0.229539	0.272716	0.228733	0.157856
17	4	Female		0.236856	0.241682	0.276765	0.229001	0.174862
17	6	Female	0	0.232502	0.242089	0.284458	0.231468	0.144136
18	1	Female	3	0.181052	0.180295	0.248567	0.191152	0.128054
18	2	Female	8	0.229563	0.220006	0.275068	0.227121	0.139677
18	3	Female	1	0.190146	0.213192	0.27051	0.187759	0.113799
18	4	Female	6.5	0.180118	0.203256	0.248778	0.235976	0.124792
18	5	Female	0	0.200939	0.206591	0.272816	0.203202	0.125624
18	6	Female	0	0.220114	0.225846	0.224329	0.228591	0.124682
19	1	Female	0.5	0.217159	0.220102	0.280999	0.246588	0.199133
19	2	Female	16.25	0.23777	0.25352	0.308445	0.260237	0.210728
19	3	Female	38	0.25183	0.263576	0.315809	0.264287	0.23665
19	4	Female	40.75	0.243741	0.277854	0.32108	0.27682	0.201697
19	5	Female	7.75	0.236817	0.264922	0.293353	0.277893	0.198029
19	6	Female	10	0.236525	0.241309	0.308091	0.26304	0.227306
20	1	Female	0	0.202856	0.205158	0.239484	0.24157	0.178564
20	2	Female		0.208972	0.219888	0.227399	0.236193	0.193627
20	3	Female	0.75	0.214642	0.210893	0.263655	0.25029	0.188374
20	4	Female		0.212702	0.228701	0.265705	0.233336	0.151807
20	5	Female	2	0.223697	0.238171	0.272579	0.247719	0.155504
20	6	Female	0	0.219315	0.22032	0.252293	0.260257	0.196171
21	1	Female	0.25	0.174253	0.176143	0.242556	0.193581	0.132588
21	2	Female	0.75	0.20863	0.225131	0.254834	0.191129	0.168377
21	3	Female	0	0.203604	0.209097	0.273892	0.206559	0.156843
21	4	Female		0.207076	0.224263	0.248624	0.202686	0.157805
21	5	Female		0.20603	0.221344	0.257228	0.235781	0.146115
21	6	Female	0	0.202124	0.225923	0.261388	0.234531	0.157144
22	1	Female		0.1823	0.188946	0.238138	0.204925	0.172288
22	2	Female	0	0.204906	0.209858	0.251585	0.215113	0.198554
22	3	Female		0.20842	0.236516	0.269577	0.217276	0.184759
22	4	Female	0	0.20712	0.219471	0.261448	0.228211	0.168206
22	5	Female	0	0.197361	0.196872	0.225783	0.212198	0.143334
22	6	Female	0	0.195712	0.207814	0.267931	0.202247	0.192436
23	1	Female		0.190794	0.184109	0.250848	0.211289	0.150364
23	2	Female	0	0.211502	0.223614	0.260591	0.224626	0.147236
23	3	Female	0	0.200418	0.223014	0.263248	0.19936	0.155354
23	4	Female	0	0.207911	0.22214	0.262298	0.230026	0.147212
23	5	Female	0	0.2019	0.199905	0.255589	0.217171	0.136661
23	6	Female	0	0.19601	0.203857	0.231292	0.203749	0.158795
24	1	Female	0	0.189971	0.208656	0.270214	0.213057	0.17079
24	2	Female	0	0.232649	0.250169	0.266032	0.248848	0.161937
24	3	Female	9.25	0.246569	0.25844	0.287433	0.246969	0.202569
24	4	Female	28.75	0.262091	0.264083	0.300212	0.22303	0.192068
24	5	Female	4.25	0.260102	0.279203	0.290719	0.246431	0.173598
24	6	Female	5	0.245547	0.254844	0.295985	0.242876	0.19296
25	1	Female	0	0.205795	0.235119	0.233182	0.20646	0.183598
25	2	Female	0.25	0.244888	0.235583	0.248707	0.221226	0.194303
25	3	Female		0.232398	0.229796	0.269968	0.227349	0.178112
25	4	Female	0	0.230693	0.236365	0.268137	0.229545	0.17558
25	5	Female	0	0.229057	0.250995	0.263758	0.229048	0.15993
25	6	Female	0	0.203184	0.219989	0.246963	0.222769	0.189348
